# Supplementary material for: Arylene–hexaynylene and –octaynylene macrocycles: extending the polyyne chains drives self-association by enhanced dispersion force
Source: Royal Society of Chemistry journal article supplement (doi:10.1039/d0cc07540j), 2020-12-15
Supplement: d0cc07540j1.pdf [file d0cc07540j1.pdf]

*Chemical Communications*  
*Electronic supplementary information*

**Arylene–hexaynylene and –octaynylene macrocycles: Extending the polyene chains drives self-association by enhanced dispersion forces**

Shin-ichiro Kato,\*<sup>a</sup> Ryo Kumagai,<sup>b</sup> Tsukasa Abe,<sup>c</sup> Chisa Higuchi,<sup>c</sup> Yoshihito Shiota,<sup>c</sup>  
Kazunari Yoshizawa,<sup>c</sup> Nobutaka Takahashi,<sup>b</sup> Koji Yamamoto,<sup>b</sup> Md. Zakir Hossain,<sup>b</sup>  
Kazuhiro Hayashi,<sup>a</sup> Takashi Hirose,<sup>d</sup> Yosuke Nakamura,\*<sup>b</sup>

<sup>a</sup> *Department of Materials Science, School of Engineering, The University of Shiga Prefecture, 2500 Hassaka-cho, Hikone, Shiga 522-8533, Japan*

<sup>b</sup> *Division of Molecular Science, Faculty of Science and Technology, Gunma University, 1-5-1 Tenjin-cho, Kiryu, Gunma 376-8515, Japan*

<sup>c</sup> *Institute for Materials Chemistry and Engineering (IMCE), Kyushu University, 744 Motoooka, Nishi-ku, Fukuoka 819-0395, Japan*

<sup>d</sup> *Institute for Chemical Research, Kyoto University, Uji, Kyoto 611-0011, Japan*

**Table of Contents**

1. Experimental Details (S2)
  - A. Synthesis of Compounds (S2)
  - B. UV–vis Spectroscopy and Cyclic Voltammetry (S7)
  - C. Evaluation of Self-Association (S7)
  - D. Theoretical Calculations (S8)
2. Supporting Figures and Tables (S9)
3. Tables of Cartesian Coordinates of Molecules (S27)
4. <sup>1</sup>H and <sup>13</sup>C NMR Spectral Data (S52)
5. References (S58)
6. Author Contributions (S59)

## 1. Experimental Details

### A. Synthesis of Compounds

Commercially available reagents and solvents were used as received: THF was distilled from Na/benzophenone. Compound **5** was prepared according to the literature procedures.<sup>[1]</sup> Oil bath was used as the heat source. Column chromatography and plug filtrations were carried out with SiO<sub>2</sub>. Thin-layer chromatography (TLC) was conducted on aluminum sheets coated with SiO<sub>2</sub> 60 F<sub>254</sub>. Melting points (M.p.) were measured with a hot-stage apparatus (Yanako MP-S3) and are uncorrected. Recycling gel-permeation chromatography (JAIGEL LC-918) was performed with UV detectors using 1H and 2H polystyrene columns eluting with CHCl<sub>3</sub>. <sup>1</sup>H and <sup>13</sup>C NMR spectra were recorded on a spectrometer (JEOL JNM-ECA600, JNM-ECS400, or JNM-ECS300) at 600 or 400 MHz for <sup>1</sup>H and 150 or 75 MHz for <sup>13</sup>C, respectively. Residual solvent signal (CHCl<sub>3</sub>) in the <sup>1</sup>H and <sup>13</sup>C NMR spectra was used as an internal reference. MALDI-TOF-MS (Shimadzu Biotech Axima Performance) and FT-MS (Thermo Fisher Scientific LTQ Orbitrap XL) spectrometric analyses were conducted in a positive mode.

#### Preparation of hexatriynyl-substituted dihydrophenanthrene **7**

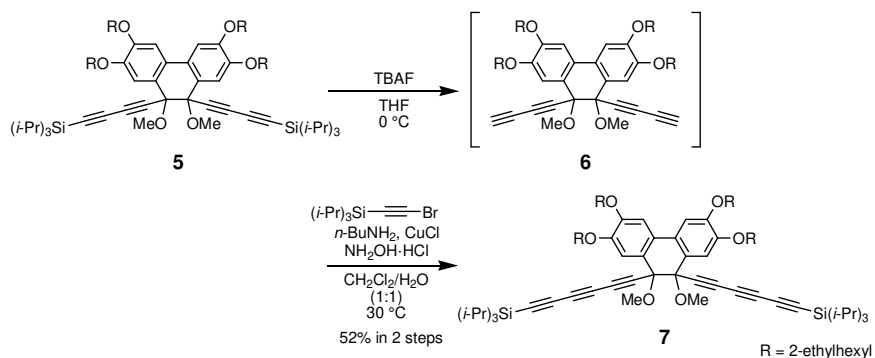

To a solution of butadiynyl-substituted dihydrophenanthrene **5** (3.58 g, 3.08 mmol, probably *trans* isomer) in THF (200 mL) was added dropwise a tetrabutylammonium fluoride THF solution (1.0 mol L<sup>-1</sup>, 15.4 mL, 15.4 mmol) at 0 °C. After the mixture was stirring for 15 min, the resulting mixture was diluted with CH<sub>2</sub>Cl<sub>2</sub>. The mixture was concentrated under reduced pressure to approximately 1 mL. The resulting mixture was subjected to silica gel column chromatography (CH<sub>2</sub>Cl<sub>2</sub>) to give a yellow solution of desilylated alkyne **6**, which was used in the next coupling reaction without further purification due to the instability. To a suspension of desilylated alkyne **6**, CuCl (304 mg, 3.08 mmol), and *n*-BuNH<sub>2</sub> (10.6 mL, 108 mmol) in H<sub>2</sub>O (50 mL) and CH<sub>2</sub>Cl<sub>2</sub> (50 mL) was added NH<sub>2</sub>OH·HCl at 0 °C under an argon atmosphere until the original blue color of the suspension disappeared. A solution of (2-bromoethynyl)triisopropylsilane (3.21 g, 12.3 mmol) in CH<sub>2</sub>Cl<sub>2</sub> (10 mL) was then added dropwise to the mixture. After the mixture was stirred at 30 °C for 12 h, H<sub>2</sub>O was added to the resulting mixture. The organic phase was separated, and the aqueous phase was extracted with CH<sub>2</sub>Cl<sub>2</sub>. The combined organic phase was dried over anhydrous MgSO<sub>4</sub> and evaporated under reduced pressure.

The residue was purified by silica gel column chromatography (hexane/EtOAc, 40:1) to afford hexatriynyl-substituted dihydrophenanthrene **7** (2.03 g, 1.68 mmol, 52%) as yellow oil. <sup>1</sup>H NMR (CDCl<sub>3</sub>, 400 MHz, probably *trans* isomer):  $\delta$  7.24 (s, 2H), 7.11 (s, 2H), 3.97–3.95 (m, 8H), 3.14 (s, 6H), 1.82–1.74 (m, 4H), 1.61–1.32 (m, 32H), 1.11 (brs, 42H), 0.99–0.89 (m, 24H); <sup>13</sup>C NMR (CDCl<sub>3</sub>, 75 MHz): 150.53, 150.50, 148.34, 125.02, 122.98, 115.60, 115.59, 110.00, 89.85, 85.61, 82.00, 75.56, 74.14, 72.08, 72.03, 71.74, 64.40, 60.67, 52.91, 39.80, 39.71, 30.80, 30.74, 29.25, 24.08, 23.25, 18.67, 14.27, 11.41 (29 signals out of 32 expected); UV–vis (CH<sub>2</sub>Cl<sub>2</sub>):  $\lambda_{\text{max}}$  = 432 nm; HR-APCI-MS (FT, positive): *m/z* calcd for C<sub>78</sub>H<sub>120</sub>O<sub>6</sub>Si<sub>2</sub>: 1208.8618, found: 1208.8629 [M<sup>+</sup>].

### Preparation of octatetraynly-substituted dihydrophenanthrene **9**

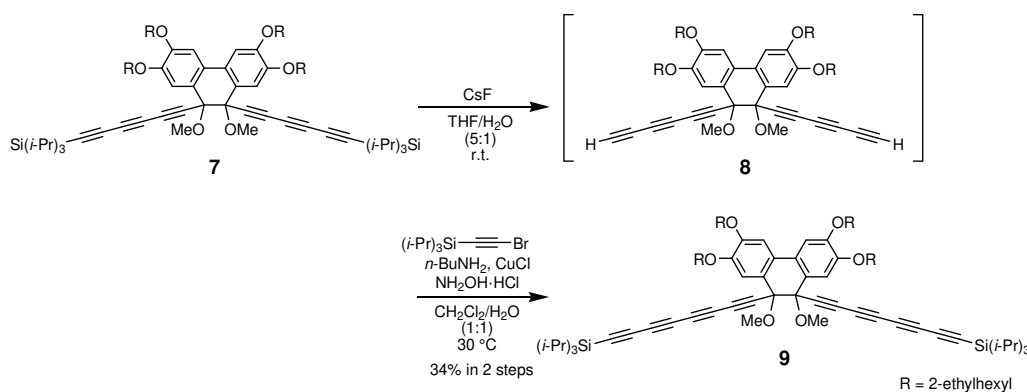

A solution of **7** (260 mg, 0.215 mmol) and cesium fluoride (78 mg, 0.52 mmol) in THF/H<sub>2</sub>O (5:1, 12 mL) was stirred at room temperature for 15 h. Then, CH<sub>2</sub>Cl<sub>2</sub> (10 mL) and H<sub>2</sub>O (10 mL) were added to the resulting mixture. The organic phase was separated, and the aqueous phase was extracted with CH<sub>2</sub>Cl<sub>2</sub>. The combined organic phase was dried over anhydrous MgSO<sub>4</sub> and concentrated under reduced pressure to approximately 1 mL. The resulting mixture was subjected to silica gel column chromatography (CH<sub>2</sub>Cl<sub>2</sub>) to give a yellow solution of desilylated alkyne **8**, which was used in the next coupling reaction without further purification due to the instability. To a suspension of desilylated alkyne **8**, CuCl (21 mg, 0.22 mmol), and *n*-BuNH<sub>2</sub> (0.75 mL, 7.5 mmol) in H<sub>2</sub>O (5 mL) and CH<sub>2</sub>Cl<sub>2</sub> (5 mL) was added NH<sub>2</sub>OH·HCl at 0 °C under an argon atmosphere until the original blue color of the suspension disappeared. A solution of (2-bromoethynyl)triisopropylsilane (225 mg, 0.865 mmol) in CH<sub>2</sub>Cl<sub>2</sub> (5 mL) was then added dropwise to the mixture. After the mixture was stirred at 30 °C for 3 h, H<sub>2</sub>O was added to the resulting mixture. The organic phase was separated, and the aqueous phase was extracted with CH<sub>2</sub>Cl<sub>2</sub>. The combined organic phase was dried over anhydrous MgSO<sub>4</sub> and evaporated under reduced pressure. The residue was purified by silica gel column chromatography (hexane/ethyl acetate, 40:1) to afford octatetraynly-substituted dihydrophenanthrene **9** (93 mg, 0.074 mmol, 34%) as yellow oil. <sup>1</sup>H NMR (CDCl<sub>3</sub>, 400 MHz, probably *trans* isomer):  $\delta$  7.21 (s, 2H), 7.11 (s, 2H), 3.97–3.95 (m, 8H), 3.15 (s, 6H), 1.79–1.76 (m, 4H), 1.60–1.28 (m, 32H), 1.10 (brs, 42H), 0.99–0.89 (m, 24H); <sup>13</sup>C NMR (CDCl<sub>3</sub>, 75 MHz): 150.62, 149.38, 148.42, 149.01, 145.82, 125.03, 122.63, 115.57, 110.05, 89.68, 86.32, 82.14, 82.94, 74.10, 72.05, 71.73, 64.62, 63.21, 61.35, 53.09, 39.79, 39.72, 30.85, 30.80,

30.75, 24.08, 23.28, 18.67, 14.27, 11.42 (30 signals out of 34 expected); UV-vis (CH<sub>2</sub>Cl<sub>2</sub>):  $\lambda_{\max}$  = 459 nm; HR-APCI-MS (FT, positive):  $m/z$  calcd for C<sub>82</sub>H<sub>120</sub>O<sub>6</sub>Si<sub>2</sub>: 1256.8618, found: 1256.8621 [M<sup>+</sup>].

### Preparation of octatetraynyl-substituted phenanthrene **10**

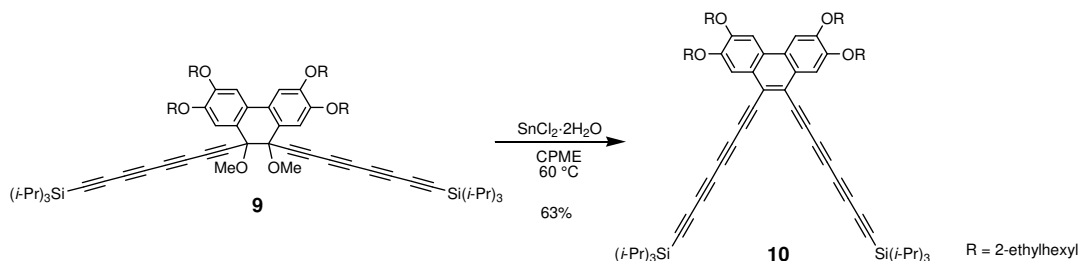

A solution of octatetraynyl-substituted dihydrophenanthrene **9** (93 mg, 0.074 mmol) and SnCl<sub>2</sub>·H<sub>2</sub>O (83 mg, 0.37 mmol) in CPME (5 mL) was bubbled with argon with stirring for 30 min. After the mixture was stirred at 60 °C for 24 h, H<sub>2</sub>O was added to the resulting mixture. The organic phase was separated, and the aqueous phase was extracted with CH<sub>2</sub>Cl<sub>2</sub>. The combined organic phase was dried over anhydrous MgSO<sub>4</sub> and evaporated under reduced pressure. The residue was purified by silica gel column (hexane/CH<sub>2</sub>Cl<sub>2</sub>, 5:1) to afford octatetraynyl-substituted phenanthrene **10** (55 mg, 0.046 mmol, 63%) as orange solids. M.p. 149–151 °C; <sup>1</sup>H NMR (CDCl<sub>3</sub>, 400 MHz):  $\delta$  7.66 (s, 2H), 7.51 (s, 2H), 4.12 (d, 4H,  $J$  = 7.2 Hz), 4.06 (d, 4H,  $J$  = 7.2 Hz), 1.92–1.82 (m, 4H), 1.62–1.32 (m, 32H), 1.11 (brs, 42H), 1.03–0.90 (m, 24H); <sup>13</sup>C NMR (CDCl<sub>3</sub>, 75 MHz): 153.76, 151.47, 150.38, 149.01, 145.82, 126.02, 124.85, 120.89, 107.65, 104.48, 90.20, 89.86, 82.94, 75.22, 71.67, 71.21, 70.49, 66.19, 61.80, 61.58, 39.67, 39.51, 31.04, 24.16, 23.27, 18.96, 14.27, 11.54, 11.45 (29 signals out of 33 expected); UV-vis (CH<sub>2</sub>Cl<sub>2</sub>):  $\lambda_{\max}$  = 462 nm; HR-APCI-MS (FT, positive):  $m/z$  calcd for C<sub>80</sub>H<sub>114</sub>O<sub>4</sub>Si<sub>2</sub>: 1194.8250, found: 1194.8265 [M<sup>+</sup>].

### Preparation of macrocycle **4**

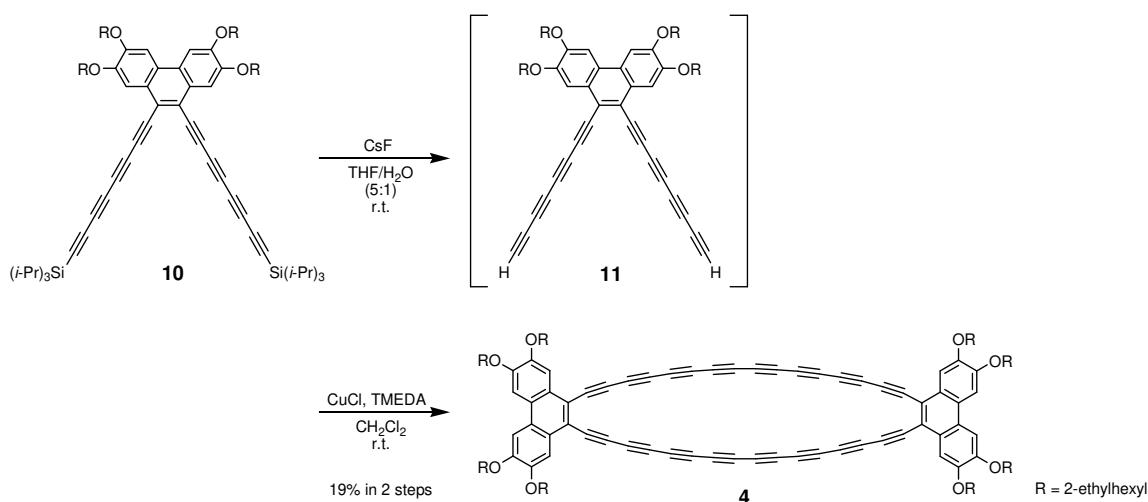

A solution of octatetraynyl-substituted phenanthrene **10** (95 mg, 0.079 mmol) and cesium fluoride (29 mg, 0.19 mmol) in THF/H<sub>2</sub>O (5:1, 25 mL) was stirred at room temperature for 8 h. Then, CH<sub>2</sub>Cl<sub>2</sub> (10

mL) and H<sub>2</sub>O (10 mL) were added to the resulting mixture. The organic phase was separated, and the aqueous phase was extracted with CH<sub>2</sub>Cl<sub>2</sub>. The combined organic phase was dried over anhydrous MgSO<sub>4</sub> and concentrated under reduced pressure to approximately 1 mL. The resulting mixture was subjected to silica gel column chromatography (CH<sub>2</sub>Cl<sub>2</sub>) to give to a yellow solution of desilylated alkyne **11**, which was used in the next coupling reaction without further purification due to the instability. To a mixture of the desilylated alkyne **11** and TMEDA (59 μL, 0.40 mmol) in CH<sub>2</sub>Cl<sub>2</sub> (7.9 mL) was added CuCl (39 mg, 0.40 mmol) at room temperature, and the resulting mixture was stirred for 10 min. The mixture was filtrated through a bed of silica gel and the filtrate was evaporated under reduced pressure. The residue was purified by silica gel column chromatography (hexane/CH<sub>2</sub>Cl<sub>2</sub>, 5:1) and recycling GPC eluting with CHCl<sub>3</sub> to afford macrocycle **4** (13 mg, 0.0074 mmol, 19%) as deep red solids. M.p. Not clear (decomp.); <sup>1</sup>H NMR (CDCl<sub>3</sub>, 600 MHz, 1.89 mmol L<sup>-1</sup>): δ 7.37 (s, 4H), 7.24 (s, 4H), 3.96–3.91 (m, 16H), 1.84–1.79 (m, 8H), 1.61–1.32 (m, 64H), 0.99–0.90 (m, 48H); <sup>13</sup>C NMR (CDCl<sub>3</sub>, 150 MHz): 151.25, 150.04, 125.12, 124.52, 124.02, 101.38, 84.56, 71.93, 71.42, 71.08, 67.99, 66.19, 65.48, 65.10, 64.29, 39.45, 39.40, 30.78, 29.67, 29.38, 29.23, 24.12, 23.98, 23.32, 23.27, 14.31, 14.27, 11.47 (28 signals out of 31 expected); UV–vis (CHCl<sub>3</sub>): λ<sub>max</sub> (ε) = 276 (174000), 292 (168000), 337 (227000), 382 (55800), 412 (63000), 467 (53200), 506 (53800), 554 (20000) nm; HR-ESI-MS (FT, positive): C<sub>124</sub>H<sub>144</sub>O<sub>8</sub>: 1761.0855, found: 1761.0867 [M<sup>+</sup>].

### Preparation of hexatriynyl-substituted phenanthrene **12**

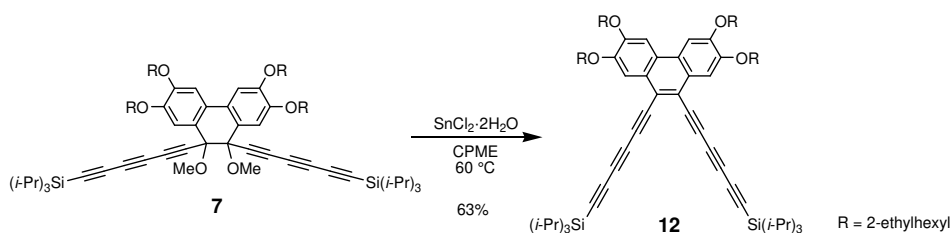

A solution of hexatriynyl-substituted dihydrophenanthrene **7** (2.00 g, 1.65 mmol) and SnCl<sub>2</sub>·2H<sub>2</sub>O (1.86 g, 8.26 mmol) in CPME (150 mL) was bubbled with argon with stirring for 30 min. After the mixture was stirred at 60 °C for 24 h, H<sub>2</sub>O was added to the resulting mixture. The organic phase was separated, and the aqueous phase was extracted with CH<sub>2</sub>Cl<sub>2</sub>. The combined organic phase was dried over anhydrous MgSO<sub>4</sub> and evaporated under reduced pressure. The residue was purified by silica gel column chromatography (hexane/CH<sub>2</sub>Cl<sub>2</sub>, 5:1) to afford hexatriynyl-substituted phenanthrene **12** (1.21 g, 1.05 mmol, 63%) as yellow solids. M.p. 145–147 °C; <sup>1</sup>H NMR (CDCl<sub>3</sub>, 400 MHz): δ 7.67 (s, 2H), 7.57 (s, 2H), 4.12–4.07 (m, 8H), 1.90–1.81 (m, 4H), 1.61–1.34 (m, 32H), 1.13 (brs, 42H), 1.03–0.90 (m, 24H); <sup>13</sup>C NMR (CDCl<sub>3</sub>, 75 MHz): 151.28, 151.03, 150.03, 126.05, 124.71, 120.99, 107.79, 104.55, 90.12, 88.32, 74.63, 71.68, 71.22, 70.12, 61.12, 48.54, 39.67, 39.52, 30.31, 24.25, 24.13, 23.28, 23.24, 18.72, 14.27, 11.51, 11.48 (27 signals out of 31 expected); UV–vis (CH<sub>2</sub>Cl<sub>2</sub>): λ<sub>max</sub> = 432 nm; HR-APCI-MS (FT, positive): *m/z* calcd for C<sub>76</sub>H<sub>114</sub>O<sub>4</sub>Si<sub>2</sub>: 1146.8250, found: 1146.8271 [M<sup>+</sup>].

### Preparation of macrocycle **3**

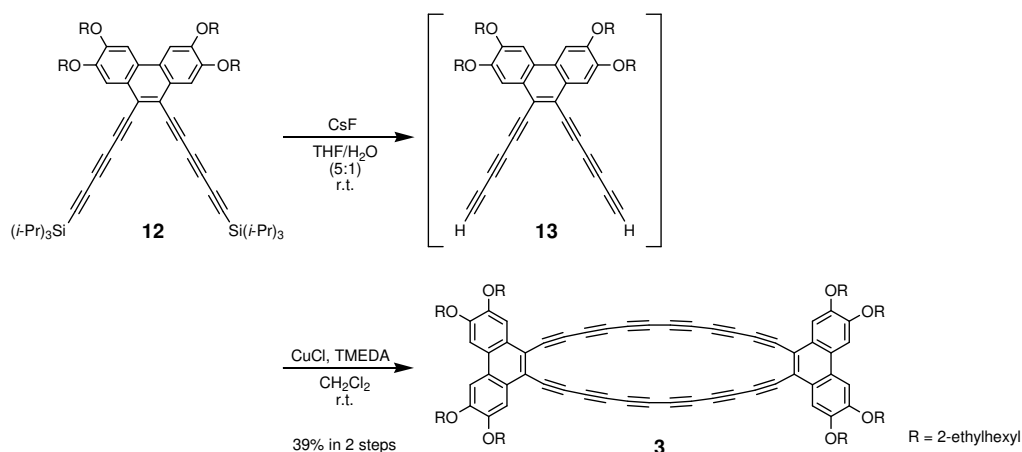

A solution of hexatriynyl-substituted phenanthrene **12** (88 mg, 0.077 mmol) and cesium fluoride (28 mg, 0.18 mmol) in THF/H<sub>2</sub>O (5:1, 25 mL) was stirred at room temperature for 15 h. Then, CH<sub>2</sub>Cl<sub>2</sub> (10 ml) and H<sub>2</sub>O (10 mL) were added to the resulting mixture. The organic phase was separated, and the aqueous phase was extracted with CH<sub>2</sub>Cl<sub>2</sub>. The combined organic phase was dried over anhydrous MgSO<sub>4</sub> and concentrated under reduced pressure to approximately 1 mL. The resulting mixture was subjected to silica gel column chromatography (CH<sub>2</sub>Cl<sub>2</sub>) to give a yellow solution of desilylated alkyne **13**, which was used in the next coupling reaction without further purification due to the instability. To a mixture of the desilylated alkyne **13** and TMEDA (58  $\mu$ L, 0.38 mmol) in CH<sub>2</sub>Cl<sub>2</sub> (7.6 mL) was added CuCl (38 mg, 0.38 mmol) at room temperature, and the resulting mixture was stirred for 1 h. The mixture was filtrated through a bed of silica gel, and the filtrate was evaporated under reduced pressure. The residue was purified by silica gel column chromatography (hexane/toluene, 3:1) to afford macrocycle **3** (25 mg, 0.023 mmol, 39%) as deep red solids. M.p. Not clear (decomp.); <sup>1</sup>H NMR (CDCl<sub>3</sub>, 400 MHz, 1.94 mmol L<sup>-1</sup>):  $\delta$  7.53 (s, 4H), 7.28 (s, 4H), 4.04 (d, 8H,  $J$  = 7.2 Hz), 3.99 (d, 8H,  $J$  = 7.2 Hz), 1.88–1.78 (m, 8H), 1.60–1.31 (m, 64H), 1.01–0.89 (m, 48H); <sup>13</sup>C NMR (CDCl<sub>3</sub>, 150 MHz): 151.39, 150.19, 125.07, 124.68, 124.45, 107.58, 104.07, 84.75, 80.02, 71.78, 71.53, 71.14, 67.86, 66.02, 64.92, 39.52, 30.82, 29.37, 29.29, 24.14, 24.06, 23.27, 14.29, 11.48 (24 signals out of 29 expected); UV–vis (CHCl<sub>3</sub>):  $\lambda_{\text{max}}$  ( $\epsilon$ ) = 276 (135000), 291 (129000), 336 (165000), 382 (41800), 411 (46600), 466 (39000), 506 (39600), 554 (14800) nm; HR-ESI-MS (FT, positive):  $m/z$  calcd for C<sub>116</sub>H<sub>144</sub>O<sub>8</sub>: 1665.0855, found: 1665.0865 [M<sup>+</sup>].

## B. UV–vis Spectroscopy and Cyclic Voltammetry

Electronic absorption spectra (JASCO JV-550 or HITACHI U-3000) were measured in a cuvette of 1 cm or 0.1 cm at room temperature. Cyclic voltammetry and differential pulse voltammetry (EC Frontier ECstat-100) were performed by using a cell equipped with platinum as a working electrode, a platinum wire as counter electrodes, and Ag/AgNO<sub>3</sub> as a referential electrode. All electrochemical measurements were performed in CH<sub>2</sub>Cl<sub>2</sub> solution (*ca.* 5 × 10<sup>-4</sup> mol L<sup>-1</sup>) containing 0.1 mol L<sup>-1</sup> [(*n*-Bu)<sub>4</sub>N][PF<sub>6</sub>] at room temperature. All potentials are referenced to the ferrocenium/ferrocene (Fc<sup>+</sup>/Fc) couple, used as a standard.

## C. Evaluation of Self-Association

Electronic absorption spectra (JASCO JV-550 or HITACHI U-3000) were measured in a cuvette of 1 cm or 0.1 cm at room temperature: the spectroscopic measurements in methylcyclohexane at various temperature were carried out with a Peltier-type temperature controller.

**Monomer–Dimer Model:**<sup>[2]</sup> The monomer–dimer model is the one for the description of dimerization. The <sup>1</sup>H NMR spectra were measured at various concentrations. According to the monomer–dimer model, the relationship between the observed chemical shifts ( $\delta_{\text{obs}}$ ) and the total concentration ( $C_T$ ) is expressed as:

$$\delta_{\text{obs}} = \delta_{\text{mon}} + (\delta_{\text{agg}} - \delta_{\text{mon}}) (4KC_T + 1 - (8KC_T + 1)^{1/2}) / 4KC_T$$

where  $K$  is the association constant,  $\delta_{\text{agg}}$  is chemical shifts of aggregated species,  $\delta_{\text{mon}}$  is chemical shifts of monomer. The observed chemical-shift data were analyzed by a nonlinear least-squares method fit to Kaleida Graph Program<sup>[3]</sup> give best-fit values for variables  $K$ ,  $\delta_{\text{mon}}$ , and  $\delta_{\text{agg}}$ .

**Isodesmic Model:**<sup>[4]</sup> The isodesmic model is the model for the description of extended aggregates. In this model, the aggregates are assumed to be one-dimensional. For all the binding events *i.e.* the addition of one monomer to another monomer or any aggregated species, the equilibrium constants are equal. The UV–vis spectra were measured at various concentrations or temperatures. According to the isodesmic model, the relationship between observed molar excitation coefficient ( $\epsilon_{\text{obs}}$ ) and  $C_T$  is expressed as:

$$\epsilon_{\text{obs}} = \epsilon_{\text{mon}} + (\epsilon_{\text{agg}} - \epsilon_{\text{mon}}) (1 - (2KC_T + 1 - (4KC_T + 1)^{1/2}) / 2K^2C_T^2)$$

where  $K$  is association constant,  $\epsilon_{\text{agg}}$  and  $\epsilon_{\text{mon}}$  are the molar excitation coefficients for the monomer and the aggregated species, respectively. The observed chemical-shift or molar excitation coefficients data were analyzed by a nonlinear least-squares method fit to Kaleida Graph Program<sup>[3]</sup> to give best-fit values for variables  $K$ ,  $\epsilon_{\text{mon}}$ , and  $\epsilon_{\text{agg}}$ .

## D. Theoretical Calculations

**Quantum Chemical Calculations.** All DFT calculations were performed by using the restricted DFT (RDFT) implemented in the Gaussian16 program package.<sup>[5]</sup> Pair interaction energy decomposition analyses (PIEDA)<sup>[6,7]</sup> were carried out for **1'**<sub>2</sub>–**4'**<sub>2</sub> at the HF/6-31G(d) level of theory. The interaction energies were calculated by using the ab initio fragment molecular orbital method<sup>[8]</sup> at the HF/6-31G(d) level of theory. To estimate  $E_{\text{DISP}}$ , calculated HF energies were corrected for dispersion interactions by using Grimme's dispersion correction scheme D3,<sup>[9–11]</sup> which is computationally inexpensive and can reasonably account for  $E_{\text{DISP}}$ .<sup>[12,13]</sup> Based on the optimized geometries of the dimer models, PIEDA implemented in the GAMESS program package<sup>[14]</sup> was carried out to determine the energetic components governing the molecular interactions. The total interaction energy ( $E_{\text{INT}}$ ) can be partitioned into the electrostatic ( $E_{\text{ES}}$ ), exchange-repulsion ( $E_{\text{EX}}$ ), charge-transfer ( $E_{\text{CT}}$ ), and dispersion ( $E_{\text{DISP}}$ ) contributions:

$$E_{\text{INT}} = E_{\text{ES}} + E_{\text{EX}} + E_{\text{CT}} + E_{\text{DISP}}$$

where  $E_{\text{EX}}$  is repulsive while others are attractive.  $E_{\text{CT}}$  includes higher-order mixed terms because it is calculated by subtracting the other two (electrostatic + exchange) components from the total pair interaction energy.

**Molecular Dynamics Simulations.** The BIOVIA Materials Studio 2020 (ver. 20.1.0.2728) was used for calculations.<sup>[15]</sup> Parameters for the molecular dynamics simulations were: COMPASS III force field as implemented, ultra-fine quality, NVE ensemble, temperature 298 K, time step 1.0 fs, total simulation time 100 ps. 201 structures were sampled over the simulation time (output every 500 frames/100000 steps).

## 2. Supporting Figures and Tables

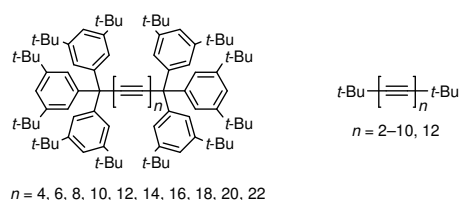

**Figure S1.** Chemical structures of Tykwinski's polyynes mentioned in this paper.<sup>[16,17]</sup>

It should be noticed that Tykwinski and co-workers have very recently isolated a polyynone featuring 24 contiguous C≡C bonds; for details, see: Y. Gao, Y. Hou, F. G. Gámez, M. J. Ferguson, J. Casado, R. R. Tykwinski, *Nat. Chem.*, 10.1038/s41557-020-0550-0.



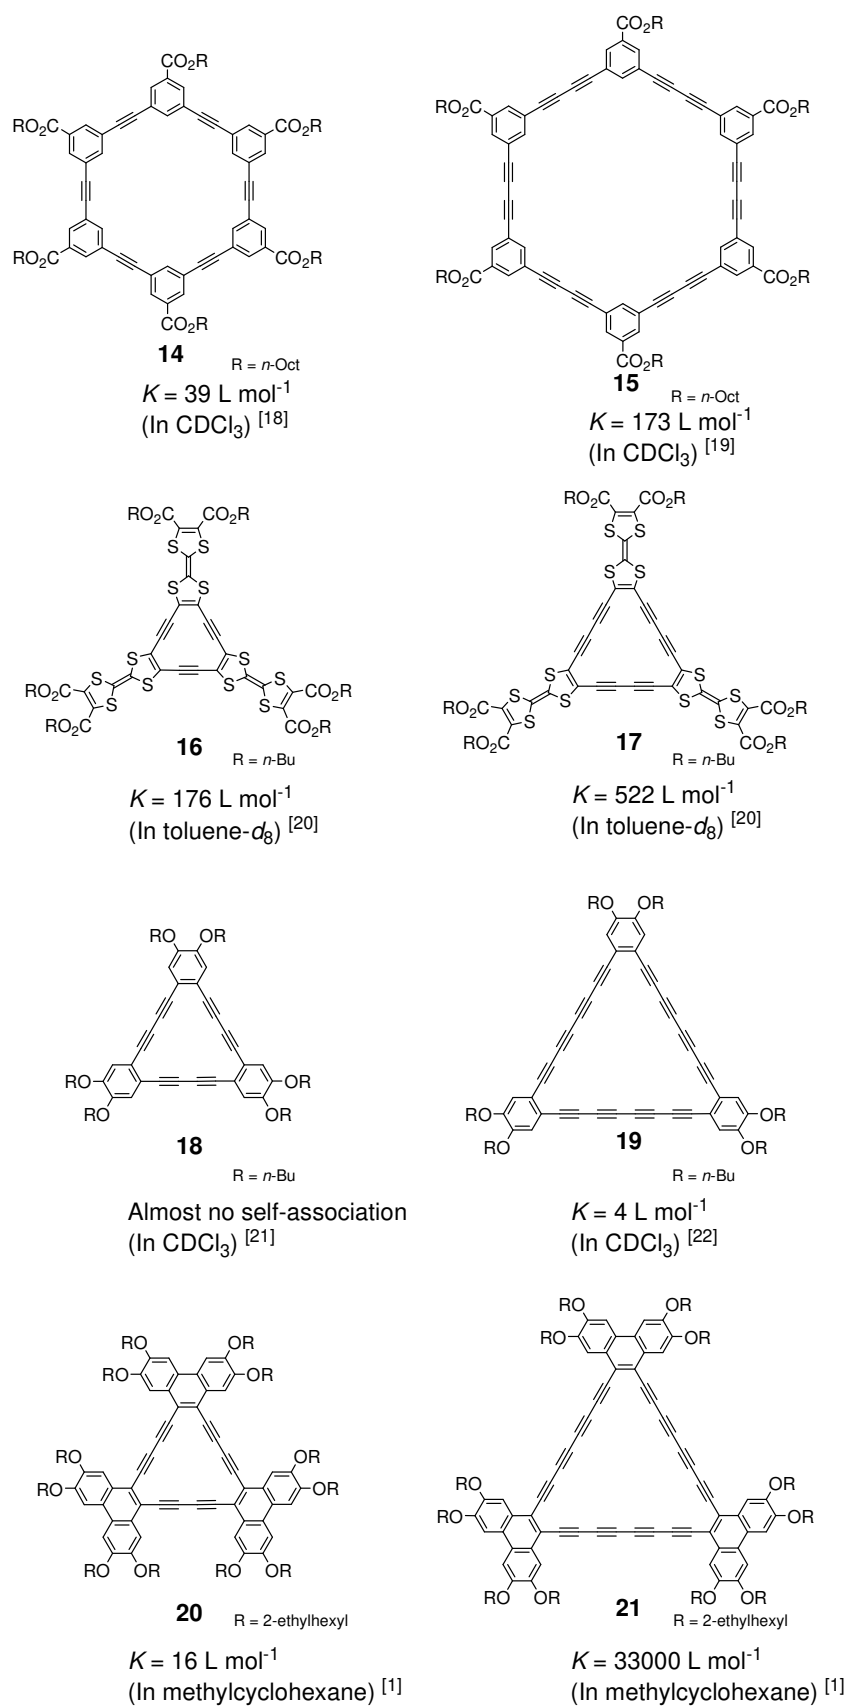

**Figure S2.** Chemical structures of selected arylene-alkynylene macrocycles and self-association constants ( $K$ ).

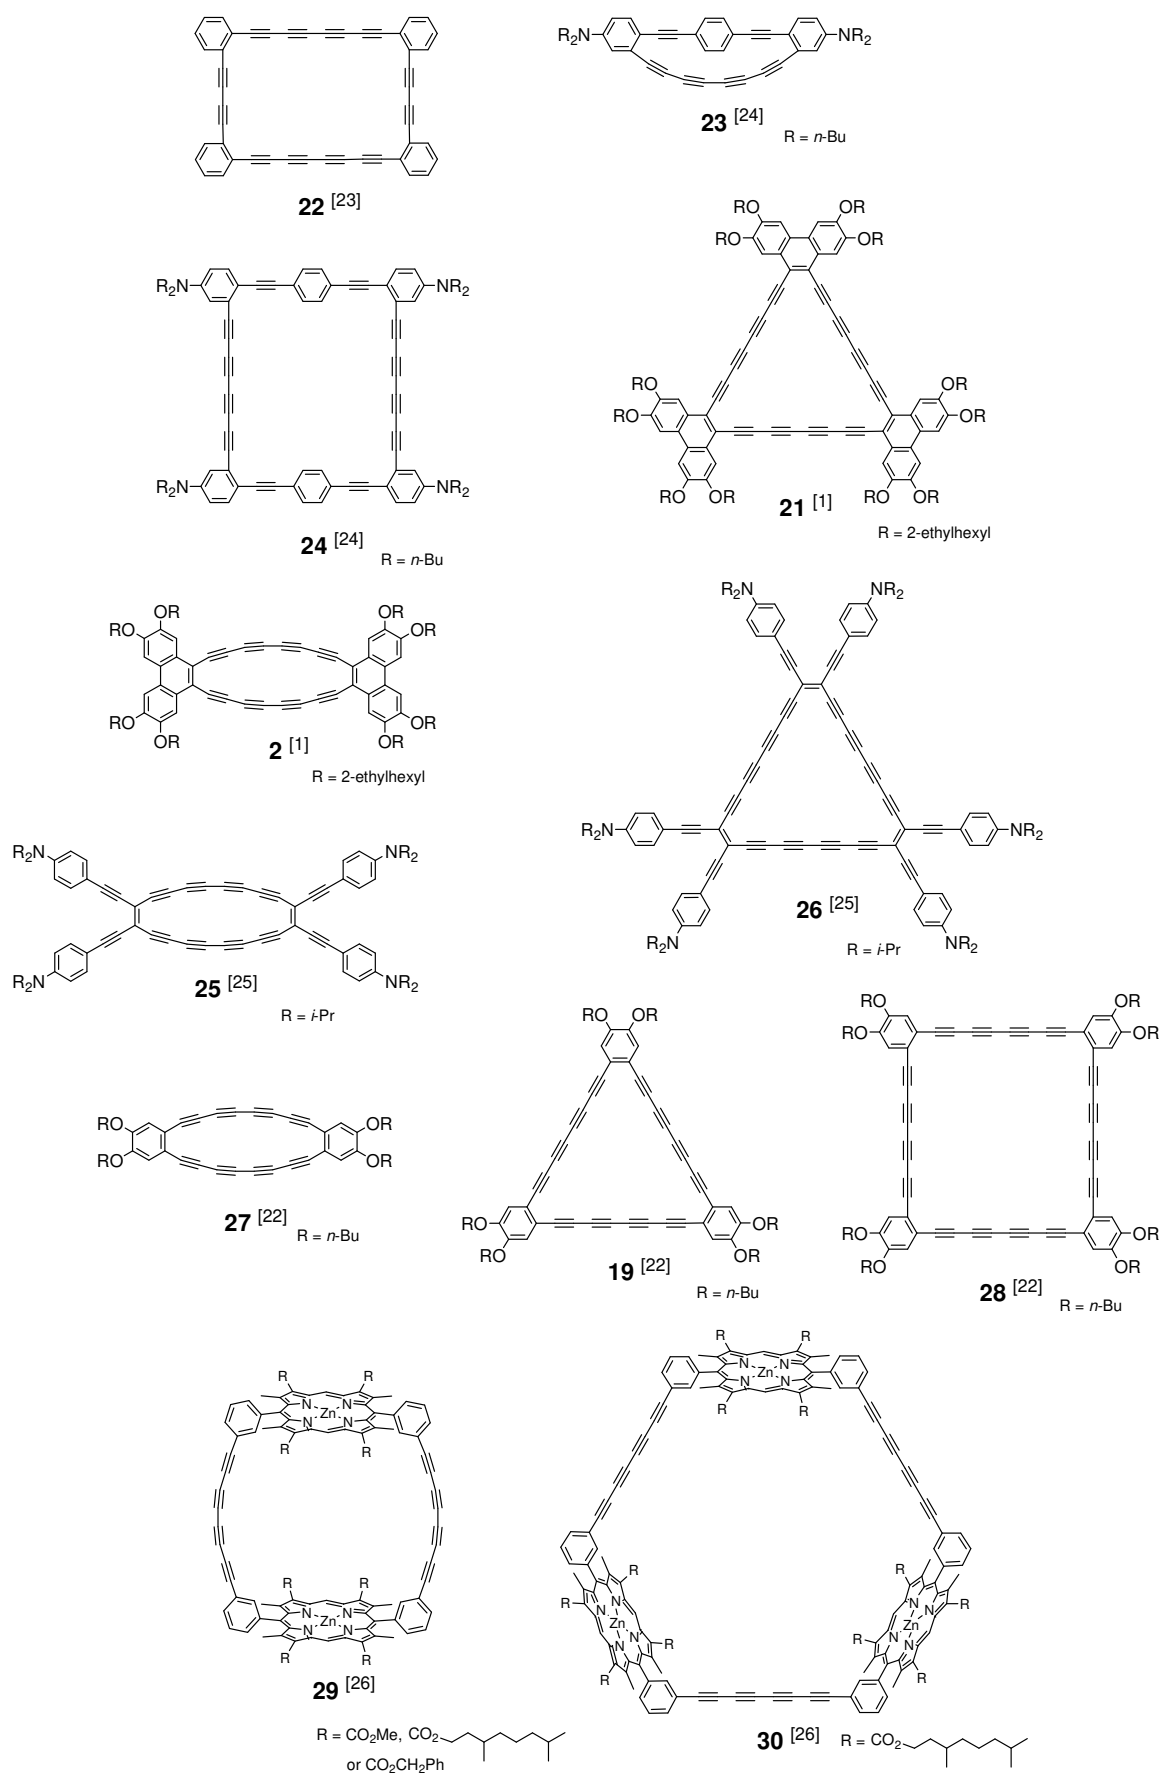

**Figure S3.** Chemical structures of arylene-alkynylene macrocycles possessing tetrayne moieties. Macrocycles **22**, **24**, **28**, **29**, and **30** are nonplanar.

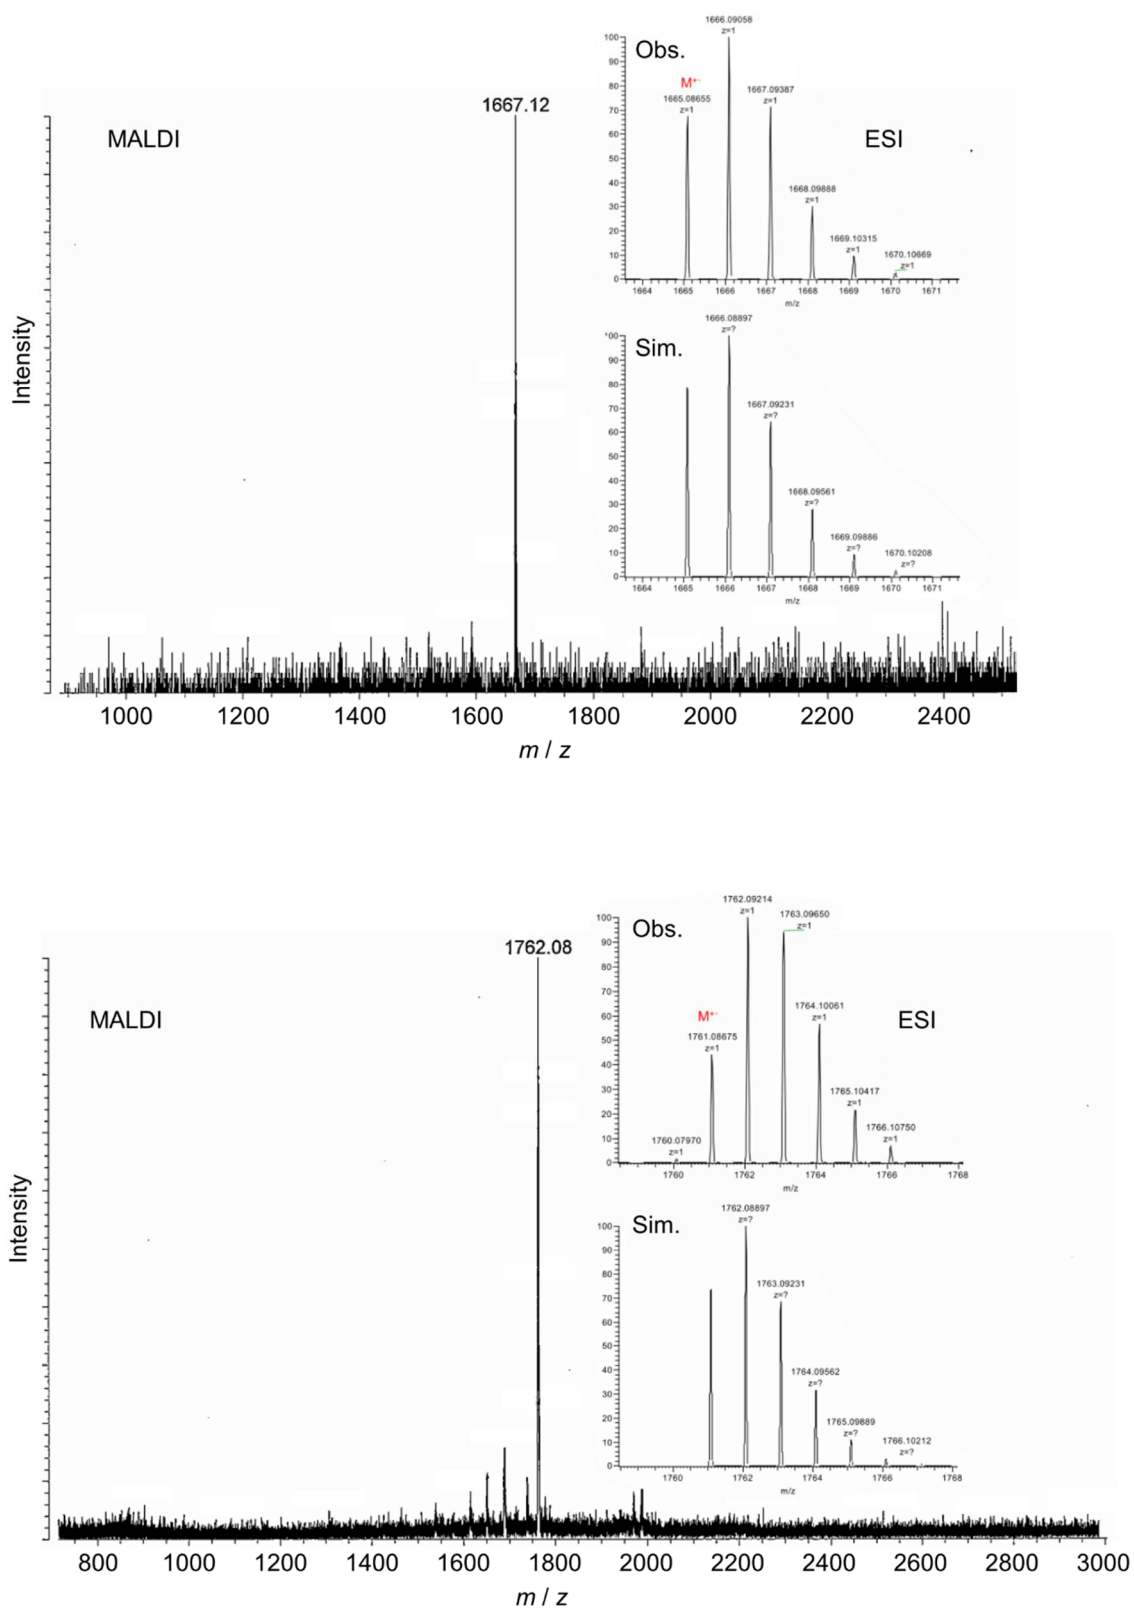

**Figure S4.** MALDI-TOF-MS (dithranol, positive) of **3** (top) and **4** (bottom). The parent  $[(M+H)^+]$  ion peaks were observed. Inset: HR-ESI-MS.

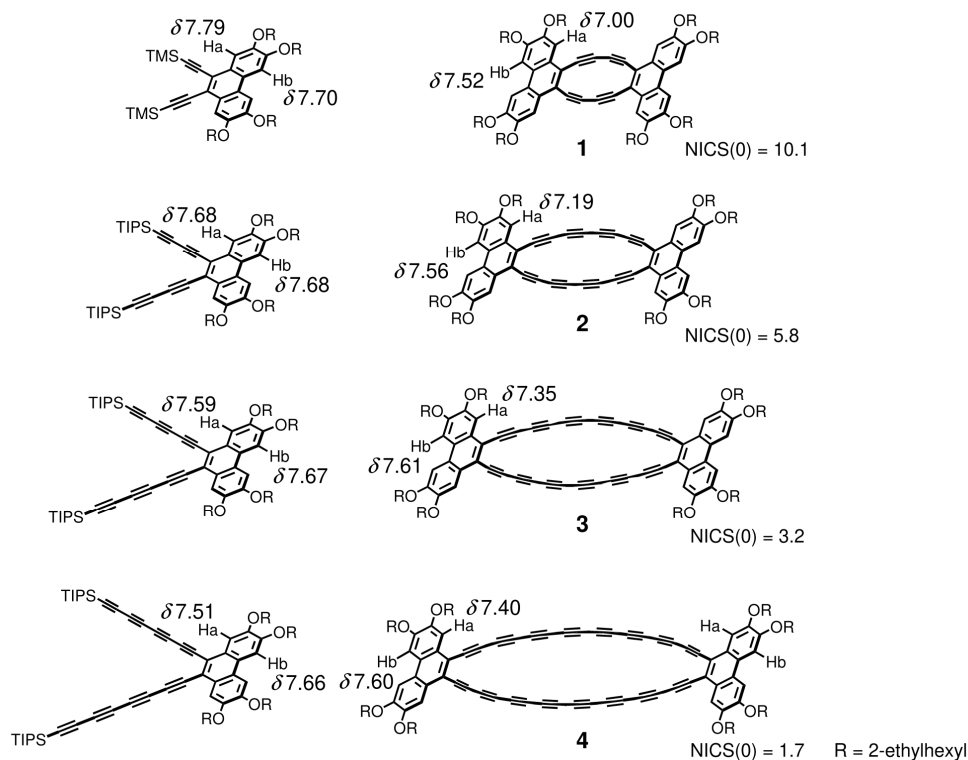

**Figure S5.** Summary of chemical shifts (ppm) in  $^1\text{H}$  NMR spectra of **1–4** in  $\text{CDCl}_3$ . NICS calculations were performed in  $1'-4'$ , in which the 2-ethylhexyl groups in **1–4** were replaced with methyl groups, at the GIAO-B3LYP/6-311+G(d)//B3LYP/6-31G(d) level of theory.

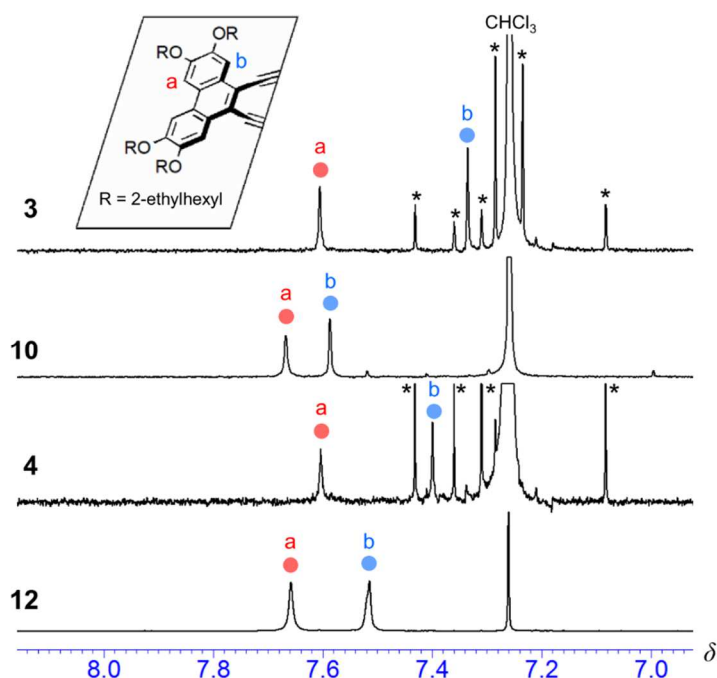

**Figure S6.** Partial  $^1\text{H}$  NMR spectra of **3**, **4**, **10**, and **12** in  $\text{CDCl}_3$ . The peaks attributed to carbon satellites, spinning sidebands, and impurities included in  $\text{CDCl}_3$  are labeled in asterisks. The spectra of highly diluted solutions of **3** and **4** were measured to estimate the chemical shifts of their monomeric species.

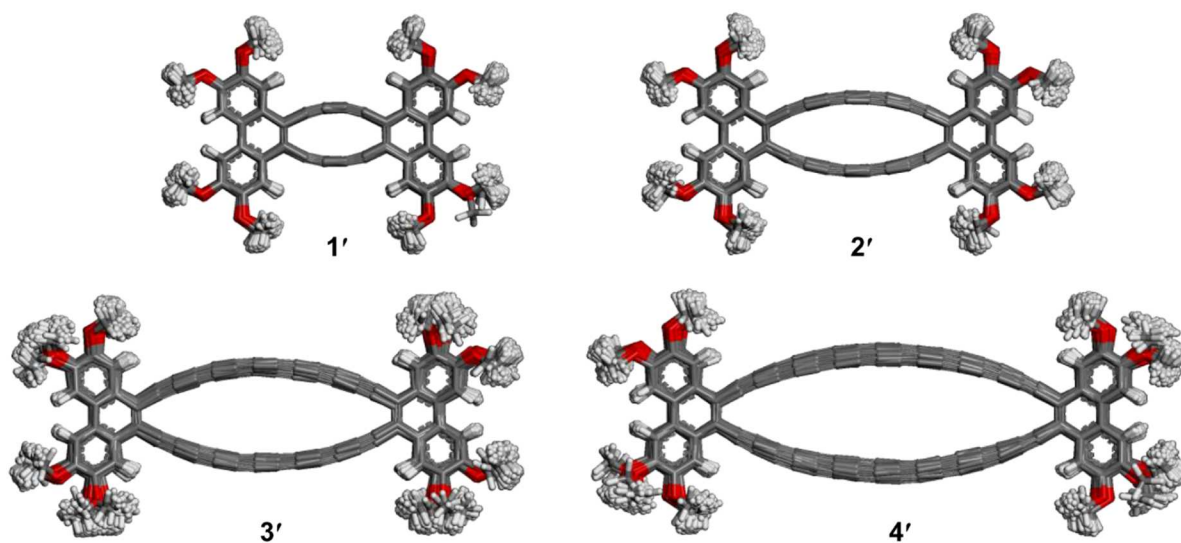

**Figure S7.** Overlays of 201 structures of **1'–4'**, in which the 2-ethylhexyloxy groups in **1–4** were replaced with methoxy groups, obtained by molecular dynamics simulations. The range of macrocyclic motion slightly increases with extending the polyynyl moieties.

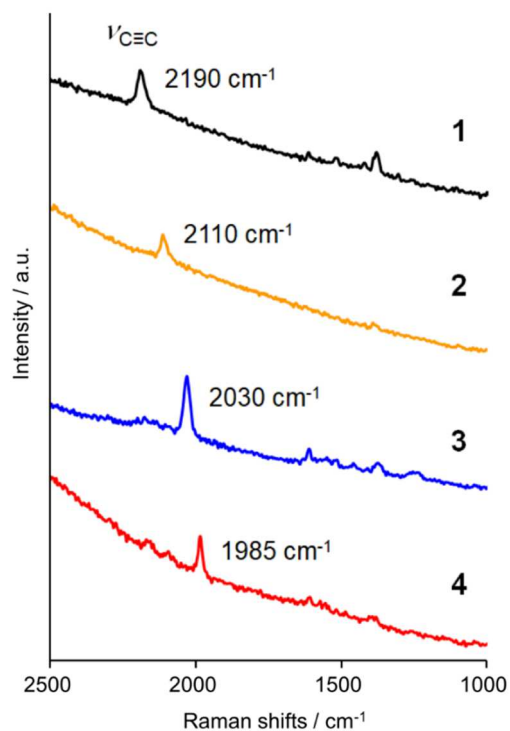

**Figure S8.** Raman spectra of solid samples of **1–4**. The Raman spectra of the samples were acquired with a 100X objective, which reduced the spatial resolution to 1  $\mu\text{m}$ .

**Table S1.** Selected Bond Lengths (Å) and Angles (°) Tabulated for DFT-Optimized Structures of **1'**–**4'**<sup>[a]</sup>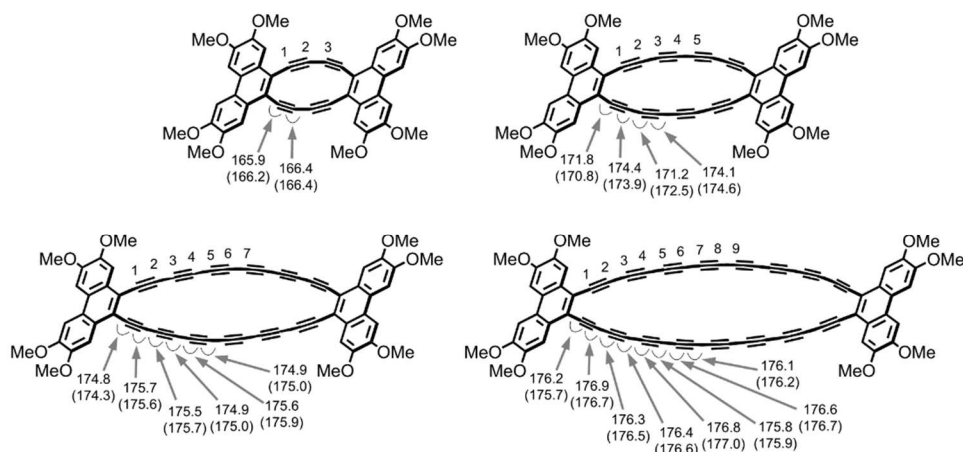

| Bond  | <b>1'</b>     | <b>2'</b>     | <b>3'</b>     | <b>4'</b>     |
|-------|---------------|---------------|---------------|---------------|
| C1–C2 | 1.223 (1.216) | 1.226 (1.217) | 1.228 (1.217) | 1.228 (1.218) |
| C2–C3 | 1.364 (1.376) | 1.350 (1.366) | 1.346 (1.364) | 1.345 (1.363) |
| C3–C4 |               | 1.233 (1.220) | 1.235 (1.222) | 1.236 (1.221) |
| C4–C5 |               | 1.344 (1.362) | 1.340 (1.359) | 1.337 (1.358) |
| C5–C6 |               |               | 1.236 (1.223) | 1.238 (1.223) |
| C6–C7 |               |               | 1.338 (1.358) | 1.335 (1.357) |
| C7–C8 |               |               |               | 1.239 (1.223) |
| C8–C9 |               |               |               | 1.334 (1.358) |

<sup>[a]</sup> Values obtained at the B3LYP/6-31G(d) level of theory (values in parentheses refers to bond lengths and angles obtained at the M06-2X/6-31G(d) level of theory)

**Table S2.** Summary of BLA Data for DFT-Optimized Structures of **1'**–**4'**<sup>[a]</sup>

|                                   | <b>1'</b>     | <b>2'</b>     | <b>3'</b>     | <b>4'</b>     |
|-----------------------------------|---------------|---------------|---------------|---------------|
| BLA <sup>[b]</sup>                | 0.141 (0.160) | 0.111 (0.142) | 0.102 (0.135) | 0.095 (0.135) |
| BLA <sub>avg</sub> <sup>[c]</sup> | 0.141 (0.160) | 0.118 (0.146) | 0.108 (0.140) | 0.103 (0.138) |

<sup>[a]</sup> Values obtained at the B3LYP/6-31G(d) level of theory (values in parentheses refers to bond lengths and angles obtained at the M06-2X/6-31G(d) level of theory) <sup>[b]</sup> The bond-length alternation (BLA) is defined as the bond length difference between the central single and the central triple bonds. <sup>[c]</sup> The averaged bond-length alternation (BLA<sub>avg</sub>) is defined as the difference between the average of all single bonds of the alkyne segment (excluding the terminal C–C bond) and triple bonds.

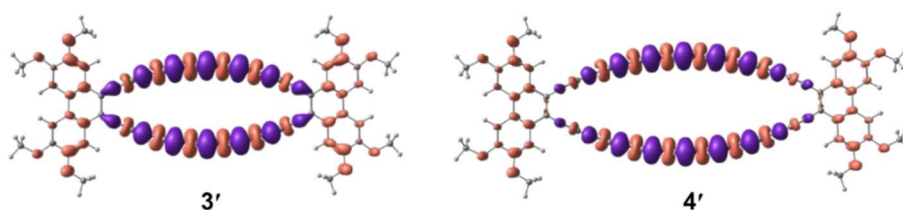

**Figure S9.** Electron density difference maps (EDDM) of the first electronic transitions of **3'** and **4'** at the TD-CAM-B3LYP/6-31G(d)//B3LYP/6-31G(d) level of theory.

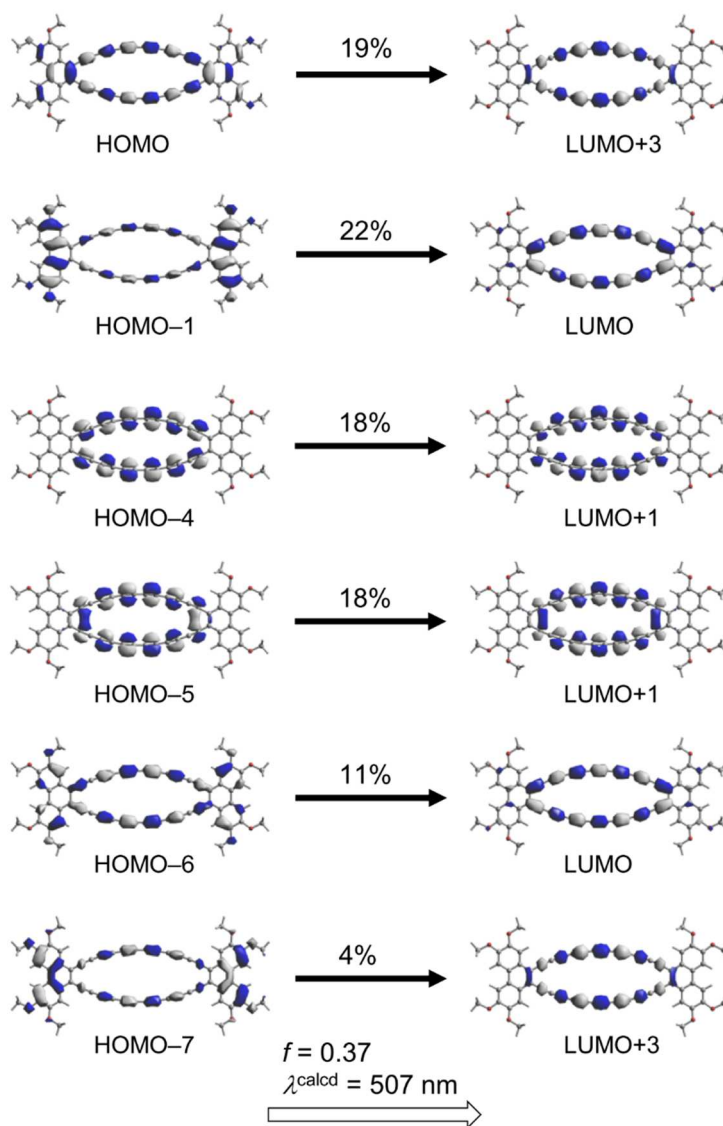

**Figure S10.** FMOs and the calculated absorption wavelength ( $\lambda^{\text{calcd}}$ ) and oscillator strengths ( $f$ ) of **3'** at the TD-CAM-B3LYP/6-31G(d)//B3LYP/6-31G(d) level of theory.

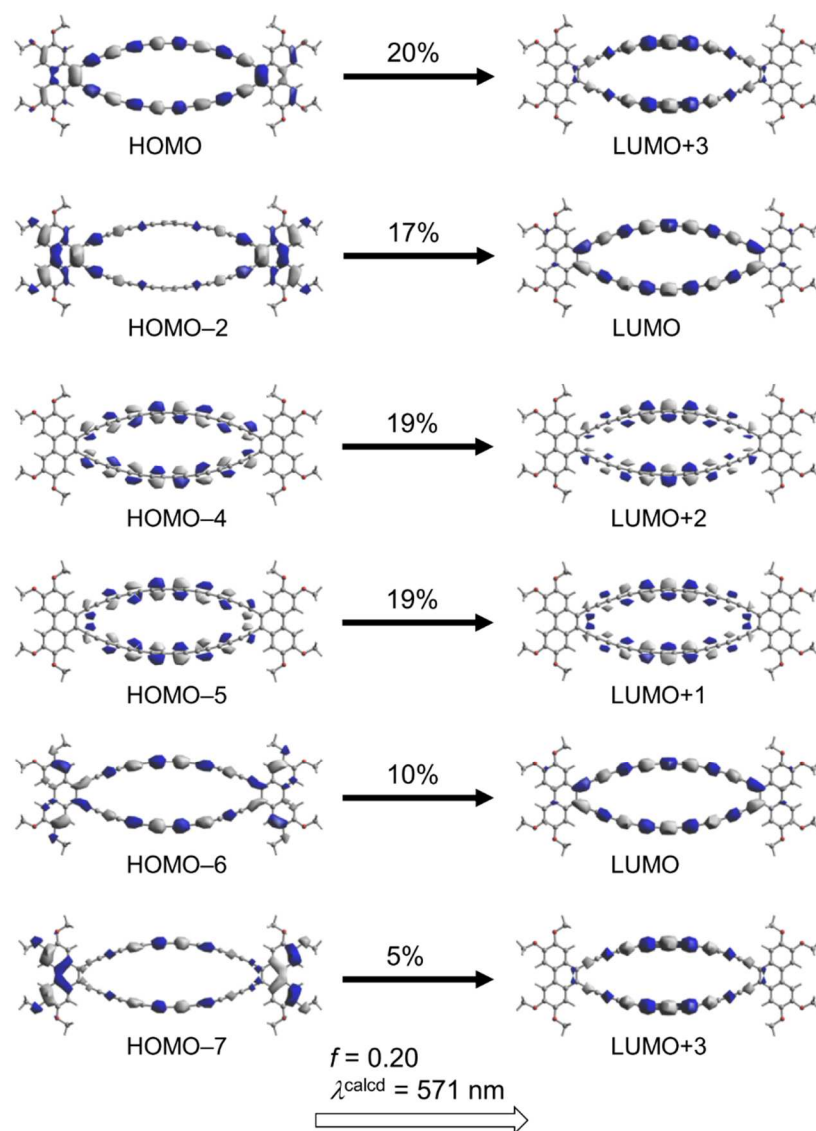

**Figure S11.** FMOs and the calculated absorption wavelength ( $\lambda^{\text{calcd}}$ ) and oscillator strengths ( $f$ ) of **4'** at the TD-CAM-B3LYP/6-31G(d)//B3LYP/6-31G(d) level of theory.



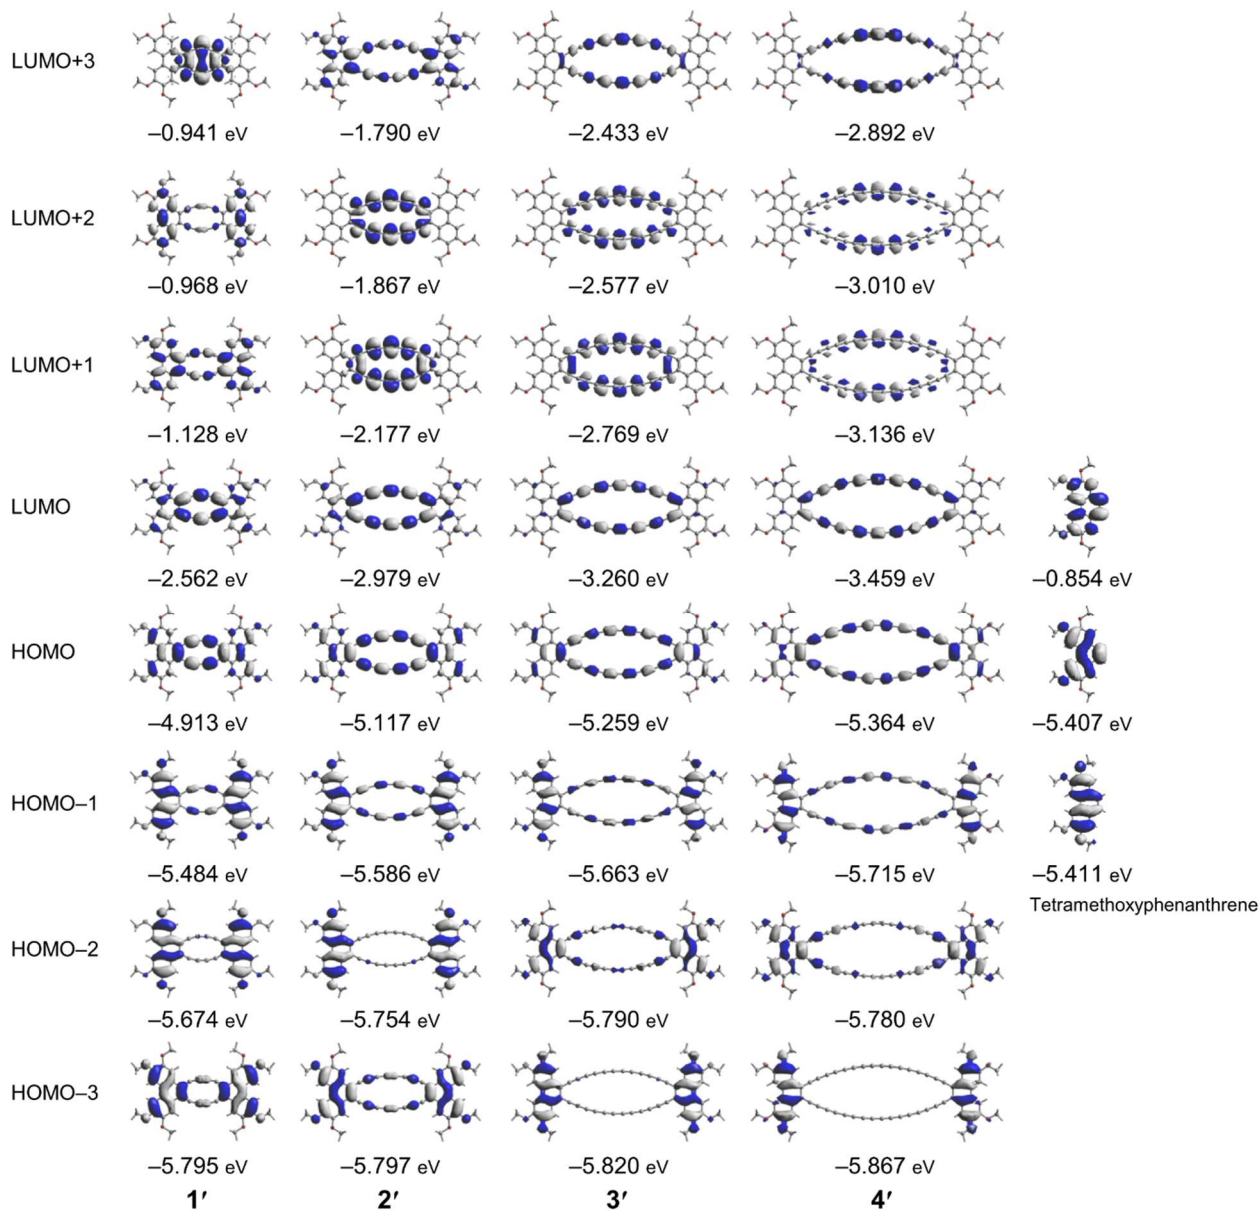

**Figure S12.** FMOs of 1'–4' and tetramethoxyphenanthrene at the B3LYP/6-31+G(d,p)//B3LYP/6-31G(d) level of theory.

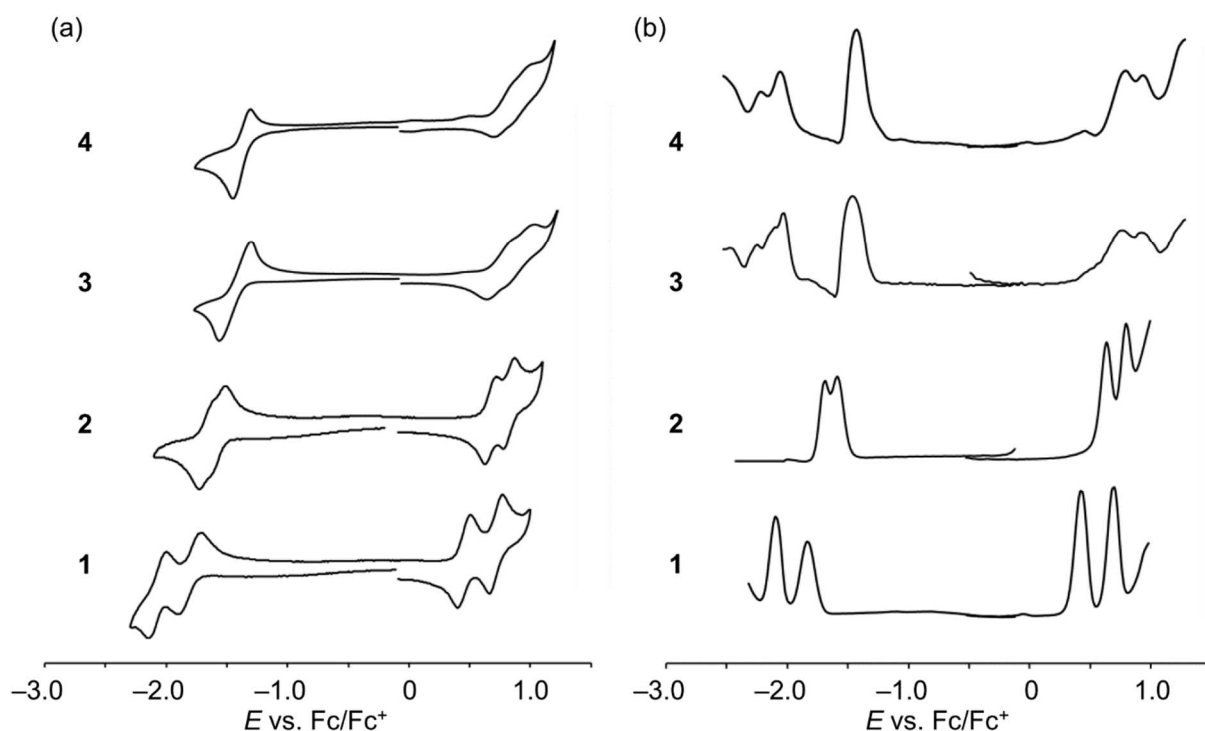

**Figure S13.** (a) Cyclic voltammograms of **1–4** at scan rate  $100 \text{ mV s}^{-1}$  in *o*-dichlorobenzene ( $0.1 \text{ mol L}^{-1}$   $[(n\text{-Bu})_4\text{N}][\text{PF}_6]$ ). (b) Differential pulse voltammograms of **1–4** at a pulse width of  $0.1 \text{ s}$  over a period of  $0.2 \text{ s}$  in *o*-dichlorobenzene ( $0.1 \text{ mol L}^{-1}$   $[(n\text{-Bu})_4\text{N}][\text{PF}_6]$ ).

**Table S3.** Differential Pulse Voltammetry Data of **1–4** in *o*-dichlorobenzene ( $0.1 \text{ mol L}^{-1}$   $[(n\text{-Bu})_4\text{N}][\text{PF}_6]$ )

| Compound | $E_{\text{red}}/\text{V}$ | $E_{\text{ox}}/\text{V}$ | $\Delta E_{\text{redox}}/\text{V}$ |
|----------|---------------------------|--------------------------|------------------------------------|
| <b>1</b> | -1.84, -2.10              | +0.42, +0.70             | 2.26                               |
| <b>2</b> | -1.58, -1.68              | +0.64, +0.80             | 2.22                               |
| <b>3</b> | -1.46                     | +0.77, +0.93             | 2.23                               |
| <b>4</b> | -1.43                     | +0.80, +0.95             | 2.23                               |

Cyclic voltammetry measurements showed that **3** and **4** exhibit reversible or quasi-reversible oxidation and reduction waves as well as **1** and **2** (Figure S13); both the difference between the first and second oxidation potentials and the difference between the first and second reduction potentials became progressively smaller upon extending the polyyn chains.

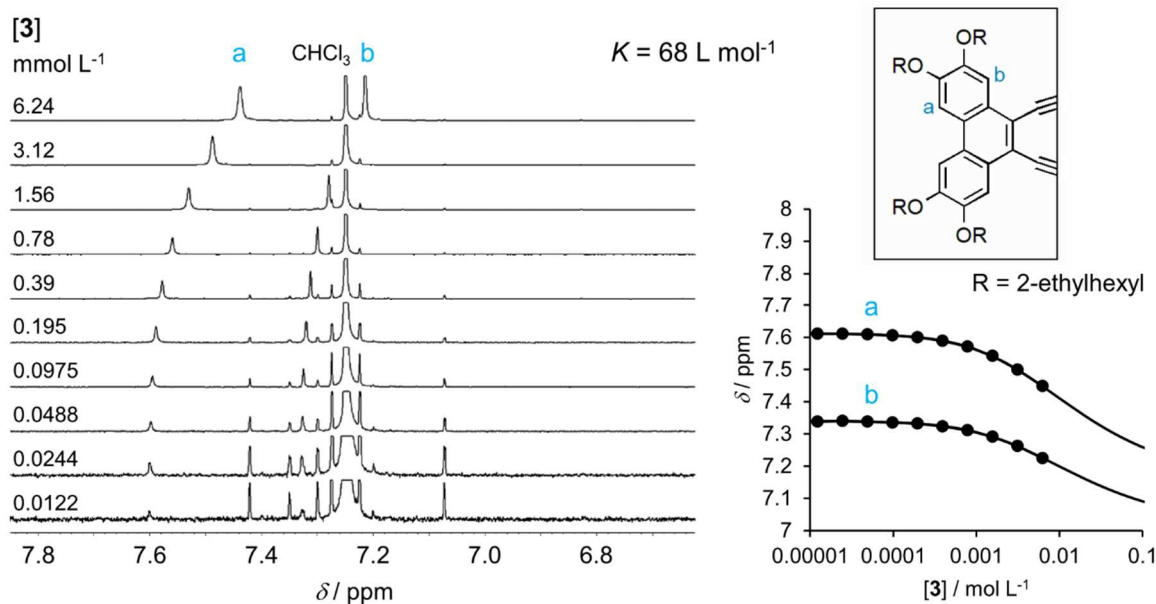

**Figure S14.** <sup>1</sup>H NMR spectra of **3** in CDCl<sub>3</sub> at different concentrations at 293 K (left) and fitting of the changes in the chemical shifts of the aromatic protons of **3** (right). The aromatic proton signals were tentatively assigned by DFT calculations at the GIAO-PCM (chloroform)-B3LYP/6-311++G(2df,2pd)//B3LYP-D3/6-31G(d) level.

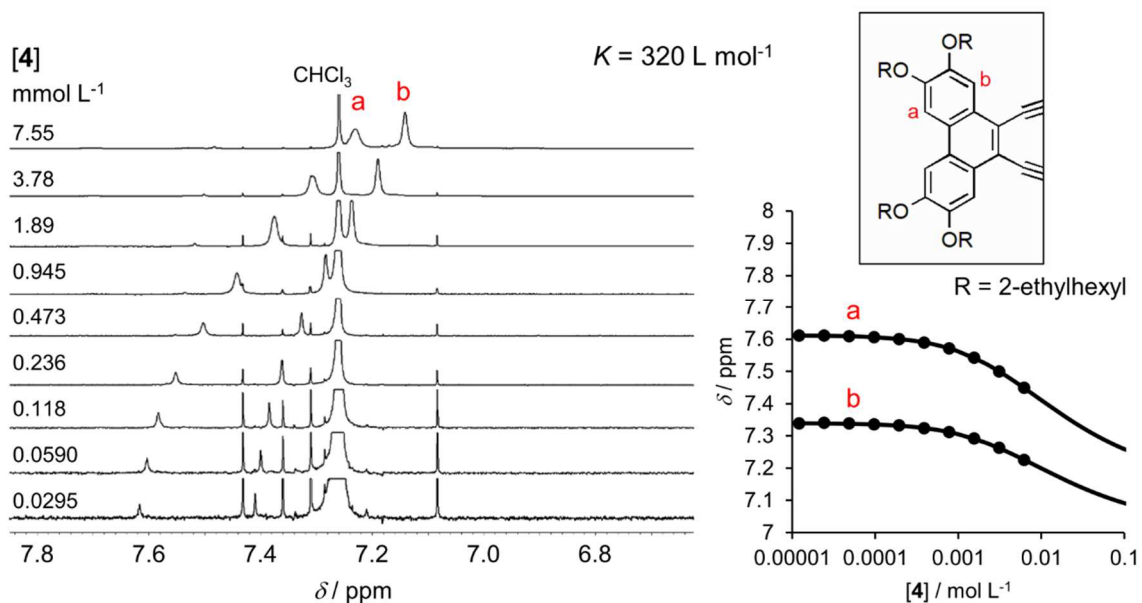

**Figure S15.** <sup>1</sup>H NMR spectra of **4** in CDCl<sub>3</sub> at different concentrations at 293 K (left) and fitting of the changes in the chemical shifts of the aromatic protons of **4** (right). The aromatic proton signals were tentatively assigned by DFT calculations at the GIAO-PCM (chloroform)-B3LYP/6-311++G(2df,2pd)//B3LYP-D3/6-31G(d) level.

**Table S4.** Association Constants ( $K$ ) of **1–4**<sup>[a]</sup>

|          | CDCl <sub>3</sub> <sup>[b,c]</sup> | Methylcyclohexane <sup>[d]</sup> |
|----------|------------------------------------|----------------------------------|
|          | $K$ [L mol <sup>-1</sup> ]         | $K$ [L mol <sup>-1</sup> ]       |
| <b>1</b> | N/A                                | 400 ± 30 <sup>[c]</sup>          |
| <b>2</b> | 9 ± 1                              | 1600 ± 100 <sup>[e]</sup>        |
| <b>3</b> | 68 ± 2                             | 8500 ± 1600 <sup>[e]</sup>       |
| <b>4</b> | 320 ± 22                           | 15500 ± 3100 <sup>[e]</sup>      |

<sup>[a]</sup> At 20 °C. <sup>[b]</sup> Monomer–dimer model. <sup>[c]</sup> Concentration-dependent <sup>1</sup>H NMR experiments.

<sup>[d]</sup> Isodesmic model. <sup>[e]</sup> Concentration-dependent UV–vis experiments.

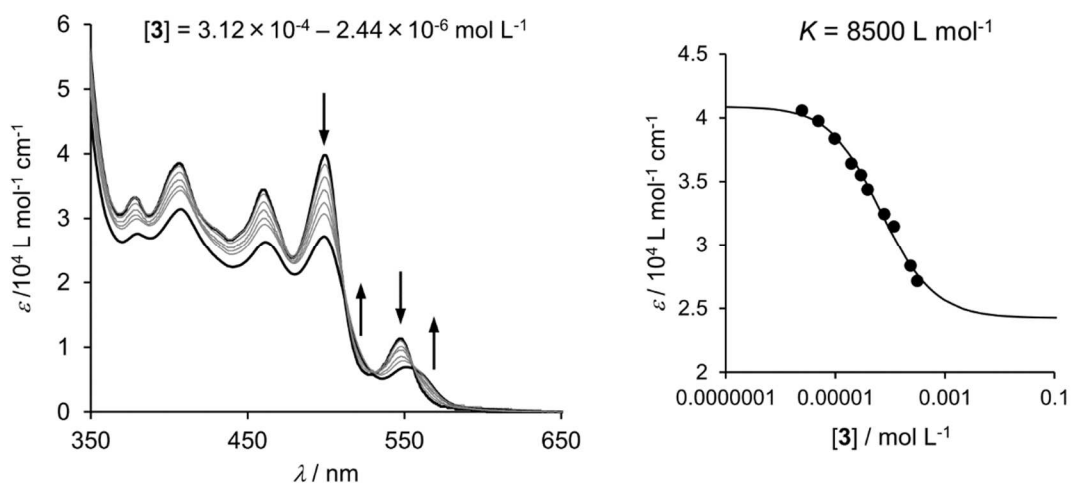

**Figure S16.** Absorption spectra of **3** in methycyclohexane at different concentrations at 293 K (left) and fitting of the changes in the molar absorptivity at 499 nm to the isodesmic model (right). Arrows indicate the spectral change with increasing concentration.

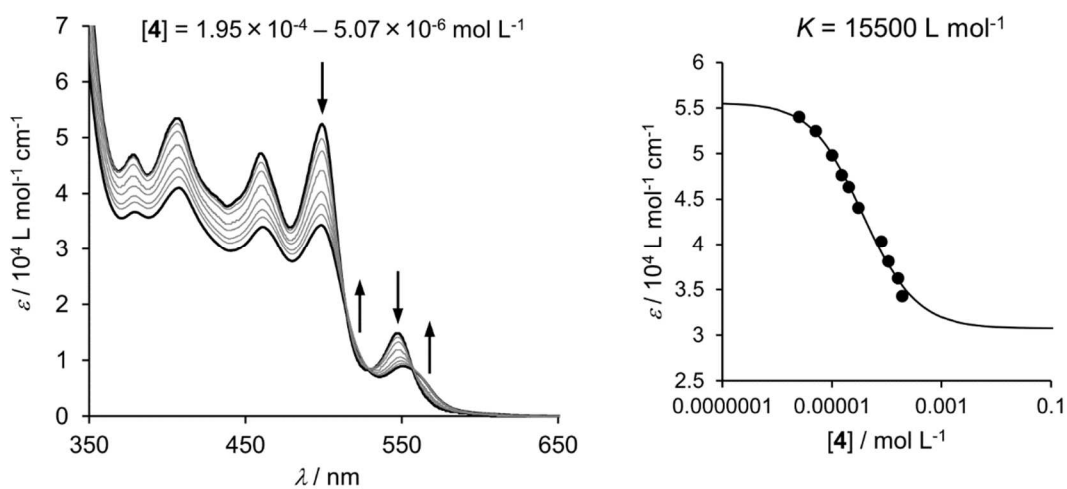

**Figure S17.** Absorption spectra of **4** in methycyclohexane at different concentrations at 293 K (left) and fitting of the changes in the molar absorptivity at 500 nm to the isodesmic model (right). Arrows indicate the spectral change with increasing concentration.

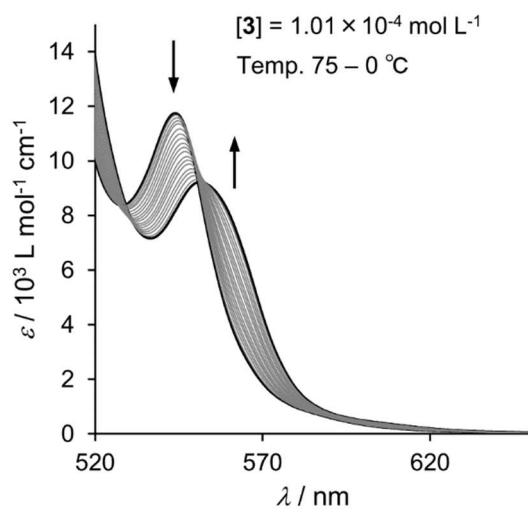

**Figure S18.** Absorption spectra of **3** in methylcyclohexane at different temperatures. Arrows indicate the spectral changes with decreasing temperature.

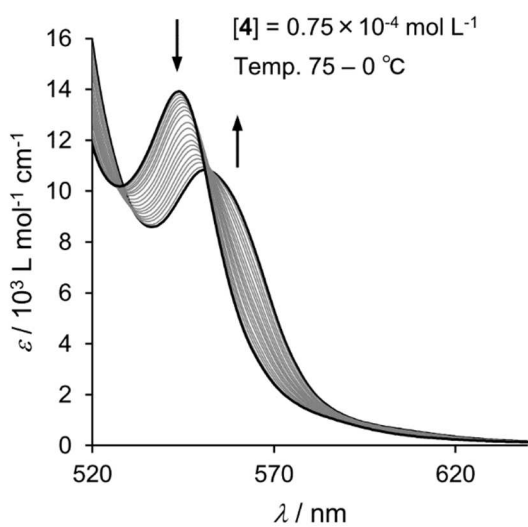

**Figure S19.** Absorption spectra of **4** in methylcyclohexane at different temperatures. Arrows indicate the spectral changes with decreasing temperature.

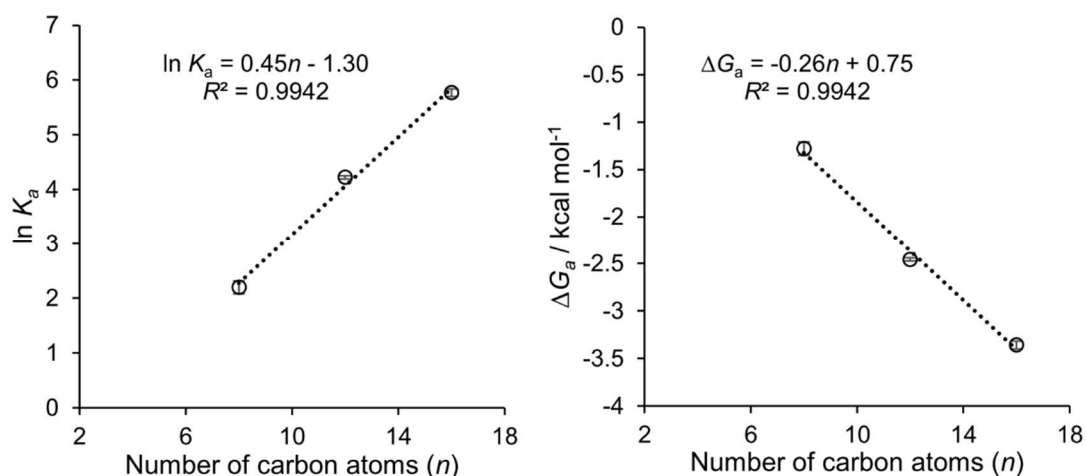

**Figure S20.** (Left) The plot of the logarithm of  $K_a$  in  $\text{CDCl}_3$  against the number of carbon atoms ( $n$ ) in each polyene chain. (Right) Gibbs free energy of self-association in  $\text{CDCl}_3$  against the number of carbon atoms in each polyene chain for **1–4**. The dotted line denotes the best-fit line by linear regression. Because **1–4** have two polyene chains, the  $\text{C}\equiv\text{C}$  unit increases by one when  $n$  is incremented by one.

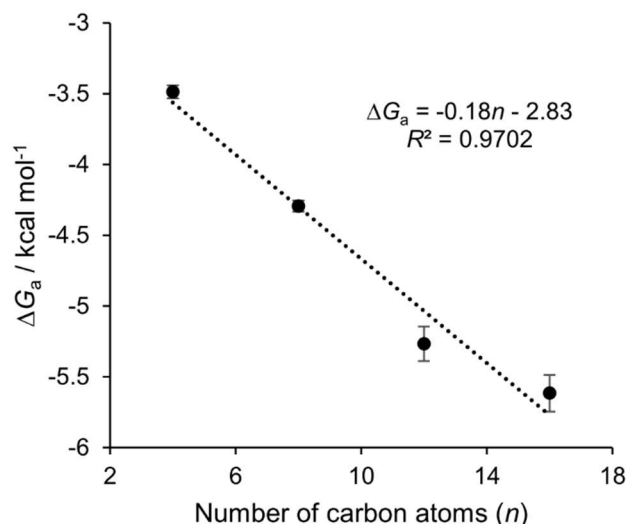

**Figure S21.** Gibbs free energy of self-association in MCH against the number of carbon atoms in each polyene chain for **1–4**. The dotted line denotes the best-fit line by linear regression. Because **1–4** have two polyene chains, the  $\text{C}\equiv\text{C}$  unit increases by one when  $n$  is incremented by one.

The natural logarithm of  $K_a$  in MCH was roughly dependent on the polyene chain length linearly (Figure 3c in the main text). The relationship can be rationalized in terms of the Gibbs free energy of self-association,  $\Delta G_a$ , in accordance with equation (1):

$$\Delta G_a = -RT \ln K_a \quad (1)$$

in which  $R$  is the gas constant and  $T$  is the temperature. The  $\Delta G_a$  value should reflect the energy gained by the formation of self-assemblies from the monomer in MCH. The plot of experimentally obtained

$G_a$  value versus the number of carbon atoms in the polyyne chain is shown in Figure S21. Linear regression gives equation (2):

$$\Delta G_a = -0.18 n - 2.83 \text{ [kcal mol}^{-1}\text{]} \quad (2)$$

in which  $n$  is the number of carbon atoms in the polyyne chain. Because **1–4** have two polyyne segments, the total number of carbon atoms increased by two when  $n$  is increased by one. Therefore, equation (2) suggests that the stabilization free energy for the formation of self-assemblies from the monomer by  $\pi$ -stacking increases by  $0.2 \text{ kcal mol}^{-1}$  at  $20 \text{ }^\circ\text{C}$  as a  $\text{C}\equiv\text{C}$  unit increases by one.

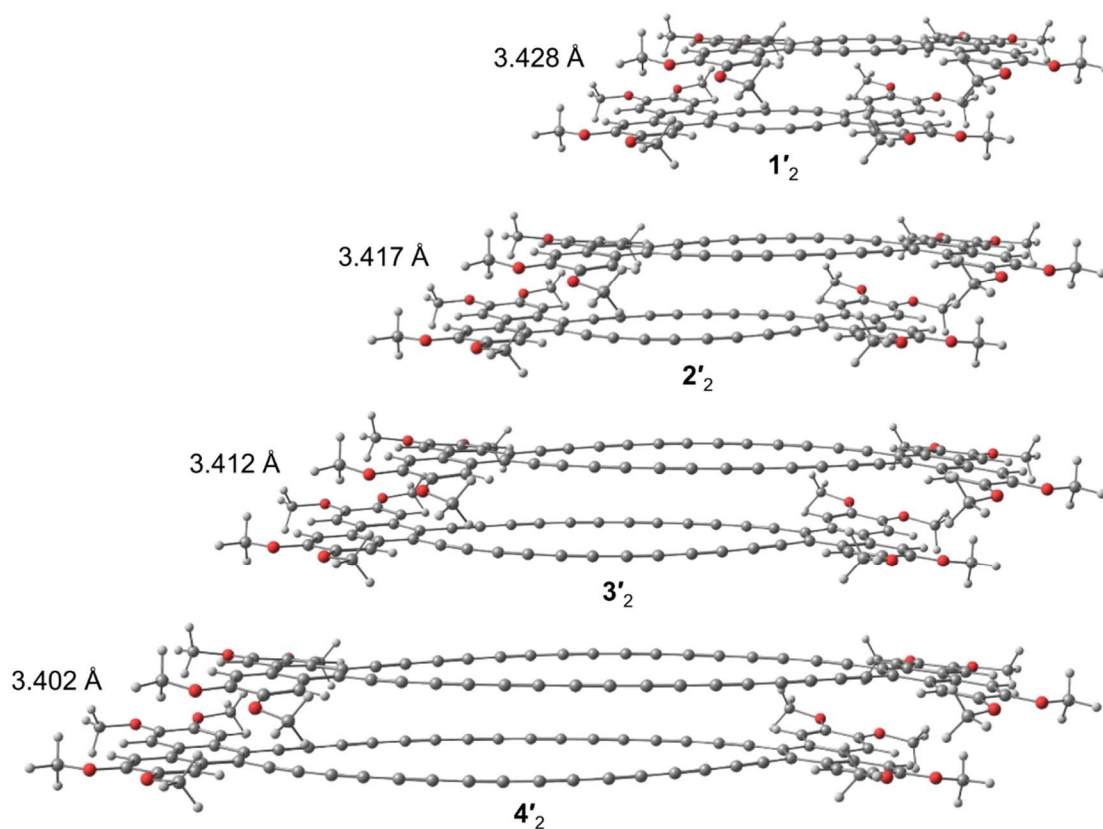

**Figure S22.** Optimized structures of dimers  $1'_2$ – $4'_2$  at the B3LYP-D3/6-31G(d) level of theory. The distance of the least-squares planes of macrocyclic rings is defined as the intermolecular distance.



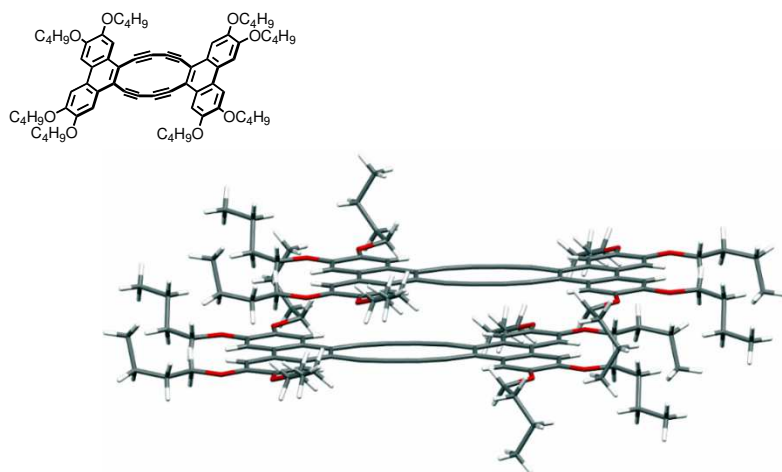

**Figure S23.** Crystal packing structure of **1''** with butoxy groups.<sup>[7]</sup>

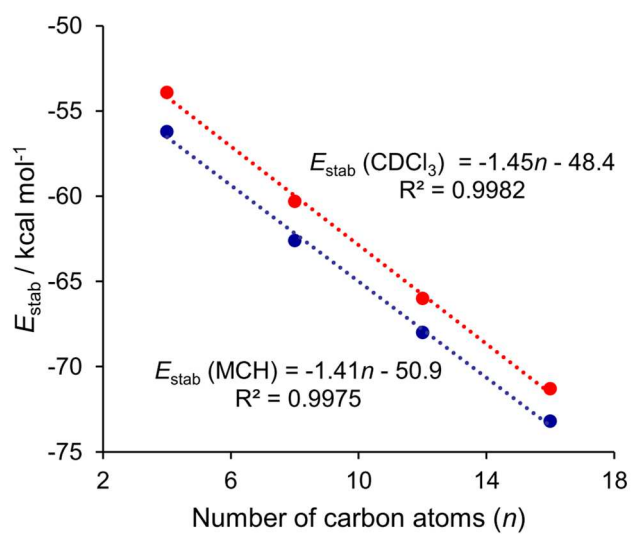

**Figure S24.** The stabilization energy values ( $E_{\text{stab}}$ ) for the formation of **1'2-4'2** calculated at the B3LYP-D3/6-31G(d) level of theory (PCM solvation model, CDCl<sub>3</sub> (blue) and MCH (red)) against the number of carbon atoms in each polyene chain for **1'-4'**. The dotted line denotes the best-fit line by linear regression.

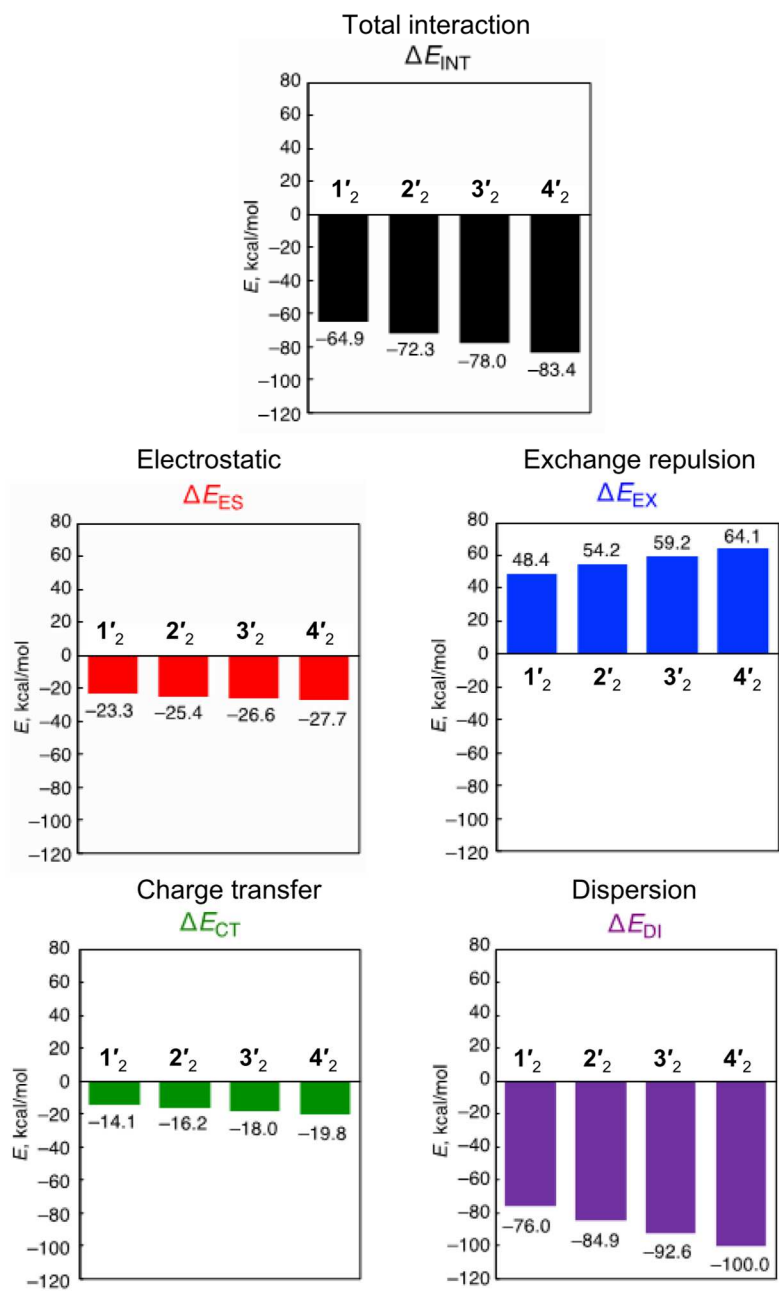

**Figure S25.** Decomposition of the total intermolecular interaction energy of  $1'_2$ - $4'_2$  calculated at the HF-GD3/6-31G(d)//B3LYP-D3/6-31G(d) level of theory.

### 3. Tables of Cartesian Coordinates of Molecules

**Table S5.** Cartesian Coordinates of **1'** at the B3LYP/6-31G(d) level

| Center Number | Atomic Number | Atomic Type | Coordinates (Angstroms) |           |           |
|---------------|---------------|-------------|-------------------------|-----------|-----------|
|               |               |             | X                       | Y         | Z         |
| 1             | 6             | 0           | 5.607674                | 0.724311  | 0.000064  |
| 2             | 6             | 0           | 4.371187                | 1.426469  | 0.000130  |
| 3             | 6             | 0           | 3.131303                | 0.702895  | 0.000068  |
| 4             | 6             | 0           | 3.131303                | -0.702895 | -0.000068 |
| 5             | 6             | 0           | 4.371187                | -1.426469 | -0.000130 |
| 6             | 6             | 0           | 5.607674                | -0.724311 | -0.000064 |
| 7             | 6             | 0           | 6.803142                | 1.490472  | 0.000131  |
| 8             | 6             | 0           | 6.788059                | 2.870639  | 0.000263  |
| 9             | 6             | 0           | 5.538019                | 3.569010  | 0.000331  |
| 10            | 6             | 0           | 4.366650                | 2.846257  | 0.000265  |
| 11            | 6             | 0           | 4.366650                | -2.846257 | -0.000265 |
| 12            | 6             | 0           | 5.538019                | -3.569010 | -0.000331 |
| 13            | 6             | 0           | 6.788059                | -2.870639 | -0.000263 |
| 14            | 6             | 0           | 6.803142                | -1.490472 | -0.000131 |
| 15            | 6             | 0           | 1.871113                | 1.365214  | 0.000162  |
| 16            | 6             | 0           | 1.871113                | -1.365214 | -0.000162 |
| 17            | 6             | 0           | 0.681637                | 1.652059  | 0.000175  |
| 18            | 6             | 0           | 0.681637                | -1.652059 | -0.000175 |
| 19            | 6             | 0           | -0.681637               | 1.652059  | -0.000175 |
| 20            | 6             | 0           | -0.681637               | -1.652059 | 0.000175  |
| 21            | 6             | 0           | -1.871113               | -1.365214 | 0.000162  |
| 22            | 6             | 0           | -3.131303               | -0.702895 | 0.000068  |
| 23            | 6             | 0           | -3.131303               | 0.702895  | -0.000068 |
| 24            | 6             | 0           | -4.371187               | 1.426469  | -0.000130 |
| 25            | 6             | 0           | -5.607674               | 0.724311  | -0.000064 |
| 26            | 6             | 0           | -5.607674               | -0.724311 | 0.000064  |
| 27            | 6             | 0           | -4.371187               | -1.426469 | 0.000130  |
| 28            | 6             | 0           | -1.871113               | 1.365214  | -0.000162 |
| 29            | 6             | 0           | -6.803142               | -1.490472 | 0.000131  |
| 30            | 6             | 0           | -6.788059               | -2.870639 | 0.000263  |
| 31            | 6             | 0           | -5.538019               | -3.569010 | 0.000331  |
| 32            | 6             | 0           | -4.366650               | -2.846257 | 0.000265  |
| 33            | 6             | 0           | -4.366650               | 2.846257  | -0.000265 |
| 34            | 6             | 0           | -5.538019               | 3.569010  | -0.000331 |
| 35            | 6             | 0           | -6.788059               | 2.870639  | -0.000263 |
| 36            | 6             | 0           | -6.803142               | 1.490472  | -0.000131 |
| 37            | 8             | 0           | 5.632294                | -4.924364 | -0.000464 |
| 38            | 6             | 0           | 4.423664                | -5.668683 | -0.000506 |
| 39            | 8             | 0           | 7.888396                | -3.668832 | -0.000330 |
| 40            | 6             | 0           | 9.163847                | -3.050804 | -0.000367 |
| 41            | 8             | 0           | 7.888396                | 3.668832  | 0.000330  |
| 42            | 6             | 0           | 9.163847                | 3.050804  | 0.000367  |
| 43            | 8             | 0           | 5.632294                | 4.924364  | 0.000464  |
| 44            | 6             | 0           | 4.423664                | 5.668683  | 0.000506  |
| 45            | 8             | 0           | -5.632294               | -4.924364 | 0.000464  |
| 46            | 6             | 0           | -4.423664               | -5.668683 | 0.000506  |
| 47            | 8             | 0           | -7.888396               | -3.668832 | 0.000330  |
| 48            | 6             | 0           | -9.163847               | -3.050804 | 0.000367  |
| 49            | 8             | 0           | -7.888396               | 3.668832  | -0.000330 |
| 50            | 6             | 0           | -9.163847               | 3.050804  | -0.000367 |
| 51            | 8             | 0           | -5.632294               | 4.924364  | -0.000464 |
| 52            | 6             | 0           | -4.423664               | 5.668683  | -0.000506 |
| 53            | 1             | 0           | 7.758260                | 0.983635  | 0.000073  |
| 54            | 1             | 0           | 3.407221                | 3.349237  | 0.000318  |
| 55            | 1             | 0           | 3.407221                | -3.349237 | -0.000318 |
| 56            | 1             | 0           | 7.758260                | -0.983635 | -0.000073 |
| 57            | 1             | 0           | -7.758260               | -0.983635 | 0.000073  |
| 58            | 1             | 0           | -3.407221               | -3.349237 | 0.000318  |
| 59            | 1             | 0           | -3.407221               | 3.349237  | -0.000318 |
| 60            | 1             | 0           | -7.758260               | 0.983635  | -0.000073 |

|    |   |   |           |           |           |
|----|---|---|-----------|-----------|-----------|
| 61 | 1 | 0 | 4.721310  | -6.718677 | -0.000588 |
| 62 | 1 | 0 | 3.822814  | -5.458208 | -0.894896 |
| 63 | 1 | 0 | 3.822832  | -5.458340 | 0.893926  |
| 64 | 1 | 0 | 9.889558  | -3.865945 | -0.000500 |
| 65 | 1 | 0 | 9.311609  | -2.431767 | -0.895507 |
| 66 | 1 | 0 | 9.311747  | -2.431941 | 0.894872  |
| 67 | 1 | 0 | 9.889558  | 3.865945  | 0.000500  |
| 68 | 1 | 0 | 9.311747  | 2.431941  | -0.894872 |
| 69 | 1 | 0 | 9.311609  | 2.431767  | 0.895507  |
| 70 | 1 | 0 | 3.822832  | 5.458340  | -0.893926 |
| 71 | 1 | 0 | 4.721310  | 6.718677  | 0.000588  |
| 72 | 1 | 0 | 3.822814  | 5.458208  | 0.894896  |
| 73 | 1 | 0 | -3.822814 | -5.458208 | 0.894896  |
| 74 | 1 | 0 | -4.721310 | -6.718677 | 0.000588  |
| 75 | 1 | 0 | -3.822832 | -5.458340 | -0.893926 |
| 76 | 1 | 0 | -9.889558 | -3.865945 | 0.000500  |
| 77 | 1 | 0 | -9.311609 | -2.431767 | 0.895507  |
| 78 | 1 | 0 | -9.311747 | -2.431941 | -0.894872 |
| 79 | 1 | 0 | -9.889558 | 3.865945  | -0.000500 |
| 80 | 1 | 0 | -9.311609 | 2.431767  | -0.895507 |
| 81 | 1 | 0 | -9.311747 | 2.431941  | 0.894872  |
| 82 | 1 | 0 | -3.822832 | 5.458340  | 0.893926  |
| 83 | 1 | 0 | -3.822814 | 5.458208  | -0.894896 |
| 84 | 1 | 0 | -4.721310 | 6.718677  | -0.000588 |

No imaginary frequency.

Total energy = -2297.45869373 hartree.

**Table S6.** Cartesian Coordinates of **1'** at the M06-2X/6-31G(d) level

| Center Number | Atomic Number | Atomic Type | Coordinates (Angstroms) |           |           |
|---------------|---------------|-------------|-------------------------|-----------|-----------|
|               |               |             | X                       | Y         | Z         |
| 1             | 6             | 0           | 5.600347                | -0.723746 | -0.000003 |
| 2             | 6             | 0           | 4.373572                | -1.421483 | 0.000002  |
| 3             | 6             | 0           | 3.138210                | -0.695447 | 0.000012  |
| 4             | 6             | 0           | 3.138206                | 0.695442  | 0.000019  |
| 5             | 6             | 0           | 4.373564                | 1.421484  | 0.000011  |
| 6             | 6             | 0           | 5.600343                | 0.723754  | -0.000002 |
| 7             | 6             | 0           | 6.797532                | -1.485578 | -0.000008 |
| 8             | 6             | 0           | 6.777245                | -2.859769 | -0.000011 |
| 9             | 6             | 0           | 5.528252                | -3.557076 | -0.000009 |
| 10            | 6             | 0           | 4.360155                | -2.839665 | -0.000001 |
| 11            | 6             | 0           | 4.360139                | 2.839666  | 0.000017  |
| 12            | 6             | 0           | 5.528232                | 3.557085  | 0.000008  |
| 13            | 6             | 0           | 6.777228                | 2.859785  | -0.000009 |
| 14            | 6             | 0           | 6.797523                | 1.485594  | -0.000014 |
| 15            | 6             | 0           | 1.869900                | -1.354726 | 0.000021  |
| 16            | 6             | 0           | 1.869892                | 1.354713  | 0.000035  |
| 17            | 6             | 0           | 0.688126                | -1.642331 | 0.000029  |
| 18            | 6             | 0           | 0.688118                | 1.642318  | 0.000045  |
| 19            | 6             | 0           | -0.688116               | -1.642314 | 0.000035  |
| 20            | 6             | 0           | -0.688124               | 1.642323  | 0.000031  |
| 21            | 6             | 0           | -1.869901               | 1.354728  | 0.000021  |
| 22            | 6             | 0           | -3.138211               | 0.695450  | 0.000013  |
| 23            | 6             | 0           | -3.138205               | -0.695438 | 0.000022  |
| 24            | 6             | 0           | -4.373563               | -1.421483 | 0.000014  |
| 25            | 6             | 0           | -5.600342               | -0.723754 | -0.000002 |
| 26            | 6             | 0           | -5.600348               | 0.723746  | -0.000002 |
| 27            | 6             | 0           | -4.373575               | 1.421485  | 0.000002  |
| 28            | 6             | 0           | -1.869889               | -1.354704 | 0.000042  |
| 29            | 6             | 0           | -6.797534               | 1.485577  | -0.000004 |
| 30            | 6             | 0           | -6.777249               | 2.859768  | -0.000007 |
| 31            | 6             | 0           | -5.528257               | 3.557077  | -0.000009 |
| 32            | 6             | 0           | -4.360160               | 2.839667  | -0.000003 |
| 33            | 6             | 0           | -4.360136               | -2.839665 | 0.000020  |
| 34            | 6             | 0           | -5.528227               | -3.557084 | 0.000009  |

|    |   |   |           |           |           |
|----|---|---|-----------|-----------|-----------|
| 35 | 6 | 0 | -6.777225 | -2.859786 | -0.000013 |
| 36 | 6 | 0 | -6.797522 | -1.485595 | -0.000019 |
| 37 | 8 | 0 | 5.625788  | 4.904786  | 0.000012  |
| 38 | 6 | 0 | 4.414298  | 5.628710  | 0.000029  |
| 39 | 8 | 0 | 7.868179  | 3.658104  | -0.000021 |
| 40 | 6 | 0 | 9.129693  | 3.029974  | -0.000025 |
| 41 | 8 | 0 | 7.868200  | -3.658082 | -0.000015 |
| 42 | 6 | 0 | 9.129710  | -3.029945 | -0.000029 |
| 43 | 8 | 0 | 5.625816  | -4.904777 | -0.000013 |
| 44 | 6 | 0 | 4.414330  | -5.628708 | -0.000030 |
| 45 | 8 | 0 | -5.625823 | 4.904777  | -0.000014 |
| 46 | 6 | 0 | -4.414337 | 5.628709  | -0.000047 |
| 47 | 8 | 0 | -7.868206 | 3.658080  | -0.000007 |
| 48 | 6 | 0 | -9.129715 | 3.029941  | -0.000023 |
| 49 | 8 | 0 | -7.868175 | -3.658107 | -0.000030 |
| 50 | 6 | 0 | -9.129689 | -3.029979 | -0.000022 |
| 51 | 8 | 0 | -5.625782 | -4.904786 | 0.000015  |
| 52 | 6 | 0 | -4.414290 | -5.628707 | 0.000021  |
| 53 | 1 | 0 | 7.752727  | -0.978956 | -0.000006 |
| 54 | 1 | 0 | 3.398361  | -3.339441 | 0.000002  |
| 55 | 1 | 0 | 3.398342  | 3.339437  | 0.000028  |
| 56 | 1 | 0 | 7.752722  | 0.978977  | -0.000031 |
| 57 | 1 | 0 | -7.752729 | 0.978954  | 0.000004  |
| 58 | 1 | 0 | -3.398366 | 3.339445  | -0.000001 |
| 59 | 1 | 0 | -3.398338 | -3.339434 | 0.000035  |
| 60 | 1 | 0 | -7.752721 | -0.978980 | -0.000044 |
| 61 | 1 | 0 | 4.692628  | 6.682162  | 0.000032  |
| 62 | 1 | 0 | 3.819783  | 5.404107  | 0.893756  |
| 63 | 1 | 0 | 3.819765  | 5.404117  | -0.893689 |
| 64 | 1 | 0 | 9.866329  | 3.833041  | -0.000021 |
| 65 | 1 | 0 | 9.264211  | 2.409218  | 0.894637  |
| 66 | 1 | 0 | 9.264211  | 2.409227  | -0.894693 |
| 67 | 1 | 0 | 9.866351  | -3.833008 | -0.000040 |
| 68 | 1 | 0 | 9.264236  | -2.409195 | 0.894636  |
| 69 | 1 | 0 | 9.264213  | -2.409190 | -0.894694 |
| 70 | 1 | 0 | 3.819801  | -5.404127 | 0.893694  |
| 71 | 1 | 0 | 4.692666  | -6.682159 | -0.000044 |
| 72 | 1 | 0 | 3.819809  | -5.404099 | -0.893751 |
| 73 | 1 | 0 | -3.819823 | 5.404093  | -0.893772 |
| 74 | 1 | 0 | -4.692674 | 6.682160  | -0.000068 |
| 75 | 1 | 0 | -3.819800 | 5.404137  | 0.893673  |
| 76 | 1 | 0 | -9.866357 | 3.833003  | -0.000036 |
| 77 | 1 | 0 | -9.264215 | 2.409186  | -0.894687 |
| 78 | 1 | 0 | -9.264242 | 2.409192  | 0.894642  |
| 79 | 1 | 0 | -9.866324 | -3.833048 | -0.000009 |
| 80 | 1 | 0 | -9.264199 | -2.409222 | 0.894640  |
| 81 | 1 | 0 | -9.264218 | -2.409235 | -0.894690 |
| 82 | 1 | 0 | -3.819761 | -5.404106 | -0.893697 |
| 83 | 1 | 0 | -3.819772 | -5.404110 | 0.893748  |
| 84 | 1 | 0 | -4.692618 | -6.682161 | 0.000018  |

-----  
No imaginary frequency.

Total energy = -2296.55219414 hartree.

**Table S7.** Cartesian Coordinates of **2'** at the B3LYP/6-31G(d) level

| Center Number | Atomic Number | Atomic Type | Coordinates (Angstroms) |           |           |
|---------------|---------------|-------------|-------------------------|-----------|-----------|
|               |               |             | X                       | Y         | Z         |
| 1             | 6             | 0           | 8.075377                | 0.720205  | 0.000006  |
| 2             | 6             | 0           | 6.844459                | 1.430169  | 0.000006  |
| 3             | 6             | 0           | 5.598045                | 0.710105  | 0.000002  |
| 4             | 6             | 0           | 5.591551                | -0.696411 | -0.000003 |
| 5             | 6             | 0           | 6.831140                | -1.428408 | -0.000005 |
| 6             | 6             | 0           | 8.068628                | -0.729976 | -0.000001 |
| 7             | 6             | 0           | 9.275509                | 1.477821  | 0.000011  |
| 8             | 6             | 0           | 9.270108                | 2.858514  | 0.000018  |

|    |   |   |            |           |           |
|----|---|---|------------|-----------|-----------|
| 9  | 6 | 0 | 8.024942   | 3.565064  | 0.000018  |
| 10 | 6 | 0 | 6.848811   | 2.849155  | 0.000012  |
| 11 | 6 | 0 | 6.822249   | -2.847339 | -0.000010 |
| 12 | 6 | 0 | 7.991674   | -3.574189 | -0.000013 |
| 13 | 6 | 0 | 9.243401   | -2.879314 | -0.000009 |
| 14 | 6 | 0 | 9.261671   | -1.498748 | -0.000002 |
| 15 | 8 | 0 | 10.374880  | 3.648180  | 0.000022  |
| 16 | 8 | 0 | 8.127396   | 4.918454  | 0.000023  |
| 17 | 6 | 0 | 6.923539   | 5.672352  | 0.000025  |
| 18 | 6 | 0 | 11.647366  | 3.022619  | 0.000059  |
| 19 | 8 | 0 | 10.340731  | -3.679280 | -0.000010 |
| 20 | 8 | 0 | 8.081514   | -4.928452 | -0.000018 |
| 21 | 6 | 0 | 6.870773   | -5.671224 | -0.000023 |
| 22 | 6 | 0 | 11.619058  | -3.065744 | -0.000043 |
| 23 | 6 | 0 | 4.357974   | 1.391424  | 0.000003  |
| 24 | 6 | 0 | 4.345141   | -1.365544 | -0.000006 |
| 25 | 6 | 0 | 3.209146   | 1.820982  | 0.000007  |
| 26 | 6 | 0 | 1.904123   | 2.165480  | 0.000005  |
| 27 | 6 | 0 | 0.677698   | 2.286144  | 0.000007  |
| 28 | 6 | 0 | 3.195369   | -1.792812 | -0.000010 |
| 29 | 6 | 0 | 1.888416   | -2.127472 | -0.000013 |
| 30 | 6 | 0 | 0.666640   | -2.290428 | -0.000013 |
| 31 | 6 | 0 | -8.075411  | -0.720201 | 0.000006  |
| 32 | 6 | 0 | -6.844535  | -1.430232 | 0.000003  |
| 33 | 6 | 0 | -5.598084  | -0.710246 | -0.000006 |
| 34 | 6 | 0 | -5.591509  | 0.696271  | -0.000012 |
| 35 | 6 | 0 | -6.831058  | 1.428345  | -0.000010 |
| 36 | 6 | 0 | -8.068585  | 0.729979  | -0.000001 |
| 37 | 6 | 0 | -9.275586  | -1.477751 | 0.000014  |
| 38 | 6 | 0 | -9.270259  | -2.858447 | 0.000021  |
| 39 | 6 | 0 | -8.025132  | -3.565064 | 0.000017  |
| 40 | 6 | 0 | -6.848963  | -2.849217 | 0.000008  |
| 41 | 6 | 0 | -6.822090  | 2.847277  | -0.000017 |
| 42 | 6 | 0 | -7.991478  | 3.574189  | -0.000015 |
| 43 | 6 | 0 | -9.243242  | 2.879380  | -0.000006 |
| 44 | 6 | 0 | -9.261586  | 1.498816  | 0.000002  |
| 45 | 8 | 0 | -10.375073 | -3.648050 | 0.000029  |
| 46 | 8 | 0 | -8.127657  | -4.918449 | 0.000024  |
| 47 | 6 | 0 | -6.923840  | -5.672408 | 0.000020  |
| 48 | 6 | 0 | -11.647526 | -3.022422 | 0.000074  |
| 49 | 8 | 0 | -10.340532 | 3.679405  | -0.000003 |
| 50 | 8 | 0 | -8.081247  | 4.928456  | -0.000022 |
| 51 | 6 | 0 | -6.870469  | 5.671166  | -0.000032 |
| 52 | 6 | 0 | -11.618889 | 3.065932  | -0.000035 |
| 53 | 6 | 0 | -4.358047  | -1.391635 | -0.000012 |
| 54 | 6 | 0 | -4.345065  | 1.365328  | -0.000021 |
| 55 | 6 | 0 | -3.209210  | -1.821174 | -0.000019 |
| 56 | 6 | 0 | -1.904152  | -2.165508 | -0.000019 |
| 57 | 6 | 0 | -0.677716  | -2.286076 | -0.000019 |
| 58 | 6 | 0 | -3.195343  | 1.792742  | -0.000028 |
| 59 | 6 | 0 | -1.888395  | 2.127404  | -0.000019 |
| 60 | 6 | 0 | -0.666660  | 2.290635  | -0.000011 |
| 61 | 1 | 0 | 10.227285  | 0.965088  | 0.000008  |
| 62 | 1 | 0 | 5.894088   | 3.360392  | 0.000013  |
| 63 | 1 | 0 | 5.862886   | -3.349828 | -0.000013 |
| 64 | 1 | 0 | 10.218194  | -0.994896 | 0.000003  |
| 65 | 1 | 0 | 7.229561   | 6.719764  | 0.000031  |
| 66 | 1 | 0 | 6.321809   | 5.466341  | -0.894572 |
| 67 | 1 | 0 | 6.321805   | 5.466332  | 0.894617  |
| 68 | 1 | 0 | 12.377268  | 3.833843  | 0.000085  |
| 69 | 1 | 0 | 11.791198  | 2.403262  | -0.895327 |
| 70 | 1 | 0 | 11.791141  | 2.403252  | 0.895446  |
| 71 | 1 | 0 | 7.167150   | -6.721408 | -0.000029 |
| 72 | 1 | 0 | 6.270946   | -5.459728 | -0.894625 |
| 73 | 1 | 0 | 6.270944   | -5.459738 | 0.894579  |
| 74 | 1 | 0 | 12.341262  | -3.883830 | -0.000067 |
| 75 | 1 | 0 | 11.768768  | -2.447786 | 0.895350  |
| 76 | 1 | 0 | 11.768717  | -2.447776 | -0.895437 |
| 77 | 1 | 0 | -10.227332 | -0.964967 | 0.000013  |

|    |   |   |            |           |           |
|----|---|---|------------|-----------|-----------|
| 78 | 1 | 0 | -5.894267  | -3.360506 | 0.000006  |
| 79 | 1 | 0 | -5.862703  | 3.349717  | -0.000024 |
| 80 | 1 | 0 | -10.218137 | 0.995014  | 0.000013  |
| 81 | 1 | 0 | -7.229913  | -6.719806 | 0.000027  |
| 82 | 1 | 0 | -6.322103  | -5.466428 | -0.894580 |
| 83 | 1 | 0 | -6.322093  | -5.466421 | 0.894612  |
| 84 | 1 | 0 | -12.377471 | -3.833607 | 0.000106  |
| 85 | 1 | 0 | -11.791258 | -2.403046 | 0.895462  |
| 86 | 1 | 0 | -11.791328 | -2.403056 | -0.895310 |
| 87 | 1 | 0 | -7.166793  | 6.721364  | -0.000037 |
| 88 | 1 | 0 | -6.270655  | 5.459639  | -0.894634 |
| 89 | 1 | 0 | -6.270646  | 5.459649  | 0.894568  |
| 90 | 1 | 0 | -12.341054 | 3.884051  | -0.000060 |
| 91 | 1 | 0 | -11.768581 | 2.447970  | -0.895429 |
| 92 | 1 | 0 | -11.768633 | 2.447983  | 0.895359  |

No imaginary frequency.

Total energy = -2602.11711011 hartree.

**Table S8.** Cartesian Coordinates of **2'** at the M06-2X/6-31G(d) level

| Center<br>Number | Atomic<br>Number | Atomic<br>Type | Coordinates (Angstroms) |           |           |
|------------------|------------------|----------------|-------------------------|-----------|-----------|
|                  |                  |                | X                       | Y         | Z         |
| 1                | 6                | 0              | 8.096578                | 0.724434  | -0.000004 |
| 2                | 6                | 0              | 6.871541                | 1.424041  | -0.000038 |
| 3                | 6                | 0              | 5.634899                | 0.695302  | -0.000047 |
| 4                | 6                | 0              | 5.634905                | -0.695324 | -0.000023 |
| 5                | 6                | 0              | 6.871559                | -1.424048 | 0.000010  |
| 6                | 6                | 0              | 8.096586                | -0.724426 | 0.000020  |
| 7                | 6                | 0              | 9.294516                | 1.484036  | 0.000003  |
| 8                | 6                | 0              | 9.276496                | 2.858643  | -0.000022 |
| 9                | 6                | 0              | 8.028680                | 3.557899  | -0.000057 |
| 10               | 6                | 0              | 6.859427                | 2.841660  | -0.000064 |
| 11               | 6                | 0              | 6.859468                | -2.841665 | 0.000033  |
| 12               | 6                | 0              | 8.028731                | -3.557889 | 0.000066  |
| 13               | 6                | 0              | 9.276538                | -2.858619 | 0.000077  |
| 14               | 6                | 0              | 9.294537                | -1.484011 | 0.000054  |
| 15               | 8                | 0              | 10.367885               | 3.654399  | -0.000018 |
| 16               | 8                | 0              | 8.127812                | 4.904307  | -0.000079 |
| 17               | 6                | 0              | 6.917477                | 5.631664  | -0.000111 |
| 18               | 6                | 0              | 11.629472               | 3.025340  | 0.000019  |
| 19               | 8                | 0              | 10.367940               | -3.654358 | 0.000109  |
| 20               | 8                | 0              | 8.127881                | -4.904297 | 0.000089  |
| 21               | 6                | 0              | 6.917559                | -5.631674 | 0.000078  |
| 22               | 6                | 0              | 11.629517               | -3.025276 | 0.000120  |
| 23               | 6                | 0              | 4.379351                | 1.364460  | -0.000096 |
| 24               | 6                | 0              | 4.379380                | -1.364522 | -0.000026 |
| 25               | 6                | 0              | 3.227650                | 1.759136  | -0.000145 |
| 26               | 6                | 0              | 1.896135                | 2.061441  | -0.000024 |
| 27               | 6                | 0              | 0.680872                | 2.176328  | -0.000038 |
| 28               | 6                | 0              | 3.227704                | -1.759267 | -0.000016 |
| 29               | 6                | 0              | 1.896193                | -2.061596 | -0.000029 |
| 30               | 6                | 0              | 0.680925                | -2.176416 | 0.000016  |
| 31               | 6                | 0              | -8.096582               | -0.724433 | -0.000001 |
| 32               | 6                | 0              | -6.871556               | -1.424059 | -0.000031 |
| 33               | 6                | 0              | -5.634902               | -0.695341 | -0.000037 |
| 34               | 6                | 0              | -5.634889               | 0.695292  | -0.000012 |
| 35               | 6                | 0              | -6.871534               | 1.424031  | 0.000017  |
| 36               | 6                | 0              | -8.096569               | 0.724427  | 0.000023  |
| 37               | 6                | 0              | -9.294531               | -1.484018 | 0.000004  |
| 38               | 6                | 0              | -9.276531               | -2.858626 | -0.000020 |
| 39               | 6                | 0              | -8.028725               | -3.557899 | -0.000050 |
| 40               | 6                | 0              | -6.859462               | -2.841676 | -0.000056 |
| 41               | 6                | 0              | -6.859421               | 2.841646  | 0.000040  |
| 42               | 6                | 0              | -8.028674               | 3.557888  | 0.000068  |
| 43               | 6                | 0              | -9.276491               | 2.858637  | 0.000076  |

|    |   |   |            |           |           |
|----|---|---|------------|-----------|-----------|
| 44 | 6 | 0 | -9.294510  | 1.484029  | 0.000054  |
| 45 | 8 | 0 | -10.367931 | -3.654366 | -0.000018 |
| 46 | 8 | 0 | -8.127876  | -4.904306 | -0.000072 |
| 47 | 6 | 0 | -6.917553  | -5.631681 | -0.000101 |
| 48 | 6 | 0 | -11.629509 | -3.025288 | 0.000016  |
| 49 | 8 | 0 | -10.367881 | 3.654392  | 0.000105  |
| 50 | 8 | 0 | -8.127803  | 4.904297  | 0.000091  |
| 51 | 6 | 0 | -6.917471  | 5.631658  | 0.000085  |
| 52 | 6 | 0 | -11.629467 | 3.025329  | 0.000112  |
| 53 | 6 | 0 | -4.379379  | -1.364556 | -0.000075 |
| 54 | 6 | 0 | -4.379368  | 1.364504  | -0.000016 |
| 55 | 6 | 0 | -3.227711  | -1.759321 | -0.000113 |
| 56 | 6 | 0 | -1.896148  | -2.061426 | -0.000089 |
| 57 | 6 | 0 | -0.680889  | -2.176355 | -0.000093 |
| 58 | 6 | 0 | -3.227721  | 1.759329  | -0.000009 |
| 59 | 6 | 0 | -1.896214  | 2.061671  | 0.000017  |
| 60 | 6 | 0 | -0.680944  | 2.176461  | 0.000039  |
| 61 | 1 | 0 | 10.249084  | 0.976517  | 0.000027  |
| 62 | 1 | 0 | 5.899482   | 3.344577  | -0.000090 |
| 63 | 1 | 0 | 5.899531   | -3.344597 | 0.000025  |
| 64 | 1 | 0 | 10.249095  | -0.976473 | 0.000064  |
| 65 | 1 | 0 | 7.198760   | 6.684190  | -0.000125 |
| 66 | 1 | 0 | 6.322897   | 5.408554  | -0.894008 |
| 67 | 1 | 0 | 6.322868   | 5.408584  | 0.893773  |
| 68 | 1 | 0 | 12.366231  | 3.828162  | 0.000020  |
| 69 | 1 | 0 | 11.763325  | 2.404841  | -0.894800 |
| 70 | 1 | 0 | 11.763288  | 2.404874  | 0.894867  |
| 71 | 1 | 0 | 7.198862   | -6.684194 | 0.000101  |
| 72 | 1 | 0 | 6.322975   | -5.408607 | -0.893826 |
| 73 | 1 | 0 | 6.322943   | -5.408578 | 0.893954  |
| 74 | 1 | 0 | 12.366291  | -3.828084 | 0.000146  |
| 75 | 1 | 0 | 11.763326  | -2.404777 | 0.894946  |
| 76 | 1 | 0 | 11.763357  | -2.404806 | -0.894721 |
| 77 | 1 | 0 | -10.249092 | -0.976485 | 0.000025  |
| 78 | 1 | 0 | -5.899523  | -3.344605 | -0.000078 |
| 79 | 1 | 0 | -5.899475  | 3.344562  | 0.000034  |
| 80 | 1 | 0 | -10.249074 | 0.976504  | 0.000060  |
| 81 | 1 | 0 | -7.198851  | -6.684203 | -0.000114 |
| 82 | 1 | 0 | -6.322967  | -5.408581 | -0.893995 |
| 83 | 1 | 0 | -6.322942  | -5.408611 | 0.893785  |
| 84 | 1 | 0 | -12.366279 | -3.828100 | 0.000016  |
| 85 | 1 | 0 | -11.763318 | -2.404820 | 0.894862  |
| 86 | 1 | 0 | -11.763351 | -2.404789 | -0.894805 |
| 87 | 1 | 0 | -7.198760  | 6.684182  | 0.000106  |
| 88 | 1 | 0 | -6.322887  | 5.408583  | -0.893817 |
| 89 | 1 | 0 | -6.322861  | 5.408554  | 0.893963  |
| 90 | 1 | 0 | -12.366229 | 3.828149  | 0.000134  |
| 91 | 1 | 0 | -11.763313 | 2.404861  | -0.894730 |
| 92 | 1 | 0 | -11.763289 | 2.404832  | 0.894937  |

-----  
No imaginary frequency.

Total energy = -2601.07949707 hartree.

**Table S9.** Cartesian Coordinates of **3'** at the B3LYP/6-31G(d) level

| Center<br>Number | Atomic<br>Number | Atomic<br>Type | Coordinates (Angstroms) |           |           |
|------------------|------------------|----------------|-------------------------|-----------|-----------|
|                  |                  |                | X                       | Y         | Z         |
| 1                | 6                | 0              | -8.049938               | 0.703559  | 0.000000  |
| 2                | 6                | 0              | -8.049938               | -0.703559 | -0.000000 |
| 3                | 6                | 0              | -9.293520               | -1.430705 | 0.000000  |
| 4                | 6                | 0              | -10.526938              | -0.725319 | 0.000000  |
| 5                | 6                | 0              | -10.526938              | 0.725319  | 0.000000  |
| 6                | 6                | 0              | -9.293520               | 1.430705  | 0.000000  |
| 7                | 6                | 0              | -11.724013              | 1.487247  | 0.000000  |
| 8                | 6                | 0              | -11.713611              | 2.868102  | 0.000000  |
| 9                | 6                | 0              | -10.465731              | 3.570067  | 0.000000  |



|    |   |   |            |           |           |
|----|---|---|------------|-----------|-----------|
| 10 | 6 | 0 | -9.292287  | 2.849473  | 0.000000  |
| 11 | 6 | 0 | -9.292287  | -2.849473 | -0.000000 |
| 12 | 6 | 0 | -10.465731 | -3.570067 | -0.000000 |
| 13 | 6 | 0 | -11.713611 | -2.868102 | -0.000000 |
| 14 | 6 | 0 | -11.724013 | -1.487247 | -0.000000 |
| 15 | 6 | 0 | -6.811761  | 1.382024  | 0.000000  |
| 16 | 6 | 0 | -5.685634  | 1.870927  | 0.000000  |
| 17 | 6 | 0 | -4.414814  | 2.314102  | 0.000000  |
| 18 | 6 | 0 | -3.220993  | 2.628140  | 0.000000  |
| 19 | 6 | 0 | -1.900350  | 2.850547  | 0.000000  |
| 20 | 6 | 0 | -0.668914  | 2.962234  | 0.000000  |
| 21 | 6 | 0 | 0.668914   | 2.962234  | 0.000000  |
| 22 | 6 | 0 | 1.900350   | 2.850547  | 0.000000  |
| 23 | 6 | 0 | 3.220993   | 2.628140  | 0.000000  |
| 24 | 6 | 0 | 4.414814   | 2.314102  | 0.000000  |
| 25 | 6 | 0 | 5.685634   | 1.870927  | 0.000000  |
| 26 | 6 | 0 | 6.811761   | 1.382024  | 0.000000  |
| 27 | 6 | 0 | 8.049938   | -0.703559 | 0.000000  |
| 28 | 6 | 0 | 8.049938   | 0.703559  | 0.000000  |
| 29 | 6 | 0 | 9.293520   | 1.430705  | 0.000000  |
| 30 | 6 | 0 | 10.526938  | 0.725319  | 0.000000  |
| 31 | 6 | 0 | 10.526938  | -0.725319 | 0.000000  |
| 32 | 6 | 0 | 9.293520   | -1.430705 | 0.000000  |
| 33 | 6 | 0 | 11.724013  | -1.487247 | 0.000000  |
| 34 | 6 | 0 | 11.713611  | -2.868102 | 0.000000  |
| 35 | 6 | 0 | 10.465731  | -3.570067 | 0.000000  |
| 36 | 6 | 0 | 9.292287   | -2.849473 | 0.000000  |
| 37 | 6 | 0 | 9.292287   | 2.849473  | 0.000000  |
| 38 | 6 | 0 | 10.465731  | 3.570067  | 0.000000  |
| 39 | 6 | 0 | 11.713611  | 2.868102  | 0.000000  |
| 40 | 6 | 0 | 11.724013  | 1.487247  | 0.000000  |
| 41 | 6 | 0 | -6.811761  | -1.382024 | -0.000000 |
| 42 | 6 | 0 | -5.685634  | -1.870927 | -0.000000 |
| 43 | 6 | 0 | -4.414814  | -2.314102 | -0.000000 |
| 44 | 6 | 0 | -3.220993  | -2.628140 | -0.000000 |
| 45 | 6 | 0 | -1.900350  | -2.850547 | -0.000000 |
| 46 | 6 | 0 | -0.668914  | -2.962234 | -0.000000 |
| 47 | 6 | 0 | 0.668914   | -2.962234 | 0.000000  |
| 48 | 6 | 0 | 1.900350   | -2.850547 | 0.000000  |
| 49 | 6 | 0 | 3.220993   | -2.628140 | 0.000000  |
| 50 | 6 | 0 | 4.414814   | -2.314102 | 0.000000  |
| 51 | 6 | 0 | 5.685634   | -1.870927 | 0.000000  |
| 52 | 6 | 0 | 6.811761   | -1.382024 | 0.000000  |
| 53 | 8 | 0 | 12.814558  | 3.661386  | 0.000000  |
| 54 | 6 | 0 | 14.090340  | 3.041620  | 0.000000  |
| 55 | 8 | 0 | 10.562893  | 4.922961  | 0.000000  |
| 56 | 6 | 0 | 9.356507   | 5.673651  | 0.000000  |
| 57 | 8 | 0 | 12.814558  | -3.661386 | -0.000000 |
| 58 | 6 | 0 | 14.090340  | -3.041620 | -0.000000 |
| 59 | 8 | 0 | 10.562893  | -4.922961 | -0.000000 |
| 60 | 6 | 0 | 9.356507   | -5.673651 | -0.000000 |
| 61 | 8 | 0 | -10.562893 | 4.922961  | -0.000000 |
| 62 | 6 | 0 | -9.356507  | 5.673651  | -0.000000 |
| 63 | 8 | 0 | -12.814558 | 3.661386  | -0.000000 |
| 64 | 6 | 0 | -14.090340 | 3.041620  | -0.000000 |
| 65 | 8 | 0 | -12.814558 | -3.661386 | 0.000000  |
| 66 | 6 | 0 | -14.090340 | -3.041620 | 0.000000  |
| 67 | 8 | 0 | -10.562893 | -4.922961 | 0.000000  |
| 68 | 6 | 0 | -9.356507  | -5.673651 | 0.000000  |
| 69 | 1 | 0 | -12.677773 | 0.978373  | 0.000000  |
| 70 | 1 | 0 | -8.336431  | 3.358291  | 0.000000  |
| 71 | 1 | 0 | -8.336431  | -3.358291 | -0.000000 |
| 72 | 1 | 0 | -12.677773 | -0.978373 | -0.000000 |
| 73 | 1 | 0 | 12.677773  | -0.978373 | 0.000000  |
| 74 | 1 | 0 | 8.336431   | -3.358291 | 0.000000  |
| 75 | 1 | 0 | 8.336431   | 3.358291  | 0.000000  |
| 76 | 1 | 0 | 12.677773  | 0.978373  | 0.000000  |
| 77 | 1 | 0 | 14.236735  | 2.423214  | 0.895520  |
| 78 | 1 | 0 | 14.236735  | 2.423214  | -0.895520 |

|     |   |   |            |           |           |
|-----|---|---|------------|-----------|-----------|
| 79  | 1 | 0 | 14.816149  | 3.856398  | 0.000000  |
| 80  | 1 | 0 | 9.659779   | 6.721763  | 0.000000  |
| 81  | 1 | 0 | 8.755758   | 5.465867  | -0.894752 |
| 82  | 1 | 0 | 8.755758   | 5.465867  | 0.894752  |
| 83  | 1 | 0 | 14.236735  | -2.423214 | 0.895520  |
| 84  | 1 | 0 | 14.816149  | -3.856398 | -0.000000 |
| 85  | 1 | 0 | 14.236735  | -2.423214 | -0.895520 |
| 86  | 1 | 0 | 8.755758   | -5.465867 | -0.894752 |
| 87  | 1 | 0 | 8.755758   | -5.465867 | 0.894752  |
| 88  | 1 | 0 | 9.659779   | -6.721763 | -0.000000 |
| 89  | 1 | 0 | -9.659779  | 6.721763  | -0.000000 |
| 90  | 1 | 0 | -8.755758  | 5.465867  | -0.894752 |
| 91  | 1 | 0 | -8.755758  | 5.465867  | 0.894752  |
| 92  | 1 | 0 | -14.816149 | 3.856398  | -0.000000 |
| 93  | 1 | 0 | -14.236735 | 2.423214  | -0.895520 |
| 94  | 1 | 0 | -14.236735 | 2.423214  | 0.895520  |
| 95  | 1 | 0 | -14.816149 | -3.856398 | 0.000000  |
| 96  | 1 | 0 | -14.236735 | -2.423214 | 0.895520  |
| 97  | 1 | 0 | -14.236735 | -2.423214 | -0.895520 |
| 98  | 1 | 0 | -9.659779  | -6.721763 | 0.000000  |
| 99  | 1 | 0 | -8.755758  | -5.465867 | -0.894752 |
| 100 | 1 | 0 | -8.755758  | -5.465867 | 0.894752  |

-----  
No imaginary frequency.

Total energy = -2906.76554668 hartree.

**Table S10.** Cartesian Coordinates of **3'** at the M06-2X/6-31G(d) level

| Center<br>Number | Atomic<br>Number | Atomic<br>Type | Coordinates (Angstroms) |           |           |
|------------------|------------------|----------------|-------------------------|-----------|-----------|
|                  |                  |                | X                       | Y         | Z         |
| 1                | 6                | 0              | -8.089224               | 0.695082  | 0.000000  |
| 2                | 6                | 0              | -8.089224               | -0.695082 | -0.000000 |
| 3                | 6                | 0              | -9.326116               | -1.424890 | 0.000000  |
| 4                | 6                | 0              | -10.550664              | -0.724384 | 0.000000  |
| 5                | 6                | 0              | -10.550664              | 0.724384  | 0.000000  |
| 6                | 6                | 0              | -9.326116               | 1.424890  | 0.000000  |
| 7                | 6                | 0              | -11.749139              | 1.483030  | 0.000000  |
| 8                | 6                | 0              | -11.732412              | 2.857702  | 0.000000  |
| 9                | 6                | 0              | -10.485062              | 3.558000  | 0.000000  |
| 10               | 6                | 0              | -9.315218               | 2.842683  | 0.000000  |
| 11               | 6                | 0              | -9.315218               | -2.842683 | -0.000000 |
| 12               | 6                | 0              | -10.485062              | -3.558000 | -0.000000 |
| 13               | 6                | 0              | -11.732412              | -2.857702 | -0.000000 |
| 14               | 6                | 0              | -11.749139              | -1.483030 | -0.000000 |
| 15               | 6                | 0              | -6.840064               | 1.372789  | 0.000000  |
| 16               | 6                | 0              | -5.717582               | 1.845064  | 0.000000  |
| 17               | 6                | 0              | -4.423683               | 2.274700  | 0.000000  |
| 18               | 6                | 0              | -3.239211               | 2.572953  | 0.000000  |
| 19               | 6                | 0              | -1.897059               | 2.787935  | 0.000000  |
| 20               | 6                | 0              | -0.679324               | 2.893567  | 0.000000  |
| 21               | 6                | 0              | 0.679324                | 2.893567  | 0.000000  |
| 22               | 6                | 0              | 1.897059                | 2.787935  | 0.000000  |
| 23               | 6                | 0              | 3.239211                | 2.572953  | 0.000000  |
| 24               | 6                | 0              | 4.423683                | 2.274700  | 0.000000  |
| 25               | 6                | 0              | 5.717582                | 1.845064  | 0.000000  |
| 26               | 6                | 0              | 6.840064                | 1.372789  | 0.000000  |
| 27               | 6                | 0              | 8.089224                | -0.695082 | 0.000000  |
| 28               | 6                | 0              | 8.089224                | 0.695082  | 0.000000  |
| 29               | 6                | 0              | 9.326116                | 1.424890  | 0.000000  |
| 30               | 6                | 0              | 10.550664               | 0.724384  | 0.000000  |
| 31               | 6                | 0              | 10.550664               | -0.724384 | 0.000000  |
| 32               | 6                | 0              | 9.326116                | -1.424890 | 0.000000  |
| 33               | 6                | 0              | 11.749139               | -1.483030 | 0.000000  |
| 34               | 6                | 0              | 11.732412               | -2.857702 | 0.000000  |
| 35               | 6                | 0              | 10.485062               | -3.558000 | 0.000000  |
| 36               | 6                | 0              | 9.315218                | -2.842683 | 0.000000  |

|     |   |   |            |           |           |
|-----|---|---|------------|-----------|-----------|
| 37  | 6 | 0 | 9.315218   | 2.842683  | 0.000000  |
| 38  | 6 | 0 | 10.485062  | 3.558000  | 0.000000  |
| 39  | 6 | 0 | 11.732412  | 2.857702  | 0.000000  |
| 40  | 6 | 0 | 11.749139  | 1.483030  | 0.000000  |
| 41  | 6 | 0 | -6.840064  | -1.372789 | -0.000000 |
| 42  | 6 | 0 | -5.717582  | -1.845064 | -0.000000 |
| 43  | 6 | 0 | -4.423683  | -2.274700 | -0.000000 |
| 44  | 6 | 0 | -3.239211  | -2.572953 | -0.000000 |
| 45  | 6 | 0 | -1.897059  | -2.787935 | -0.000000 |
| 46  | 6 | 0 | -0.679324  | -2.893567 | -0.000000 |
| 47  | 6 | 0 | 0.679324   | -2.893567 | 0.000000  |
| 48  | 6 | 0 | 1.897059   | -2.787935 | 0.000000  |
| 49  | 6 | 0 | 3.239211   | -2.572953 | 0.000000  |
| 50  | 6 | 0 | 4.423683   | -2.274700 | 0.000000  |
| 51  | 6 | 0 | 5.717582   | -1.845064 | 0.000000  |
| 52  | 6 | 0 | 6.840064   | -1.372789 | 0.000000  |
| 53  | 8 | 0 | 12.823449  | 3.652264  | 0.000000  |
| 54  | 6 | 0 | 14.085252  | 3.022932  | 0.000000  |
| 55  | 8 | 0 | 10.584837  | 4.903556  | 0.000000  |
| 56  | 6 | 0 | 9.375336   | 5.632921  | 0.000000  |
| 57  | 8 | 0 | 12.823449  | -3.652264 | -0.000000 |
| 58  | 6 | 0 | 14.085252  | -3.022932 | -0.000000 |
| 59  | 8 | 0 | 10.584837  | -4.903556 | -0.000000 |
| 60  | 6 | 0 | 9.375336   | -5.632921 | -0.000000 |
| 61  | 8 | 0 | -10.584837 | 4.903556  | -0.000000 |
| 62  | 6 | 0 | -9.375336  | 5.632921  | -0.000000 |
| 63  | 8 | 0 | -12.823449 | 3.652264  | -0.000000 |
| 64  | 6 | 0 | -14.085252 | 3.022932  | -0.000000 |
| 65  | 8 | 0 | -12.823449 | -3.652264 | 0.000000  |
| 66  | 6 | 0 | -14.085252 | -3.022932 | 0.000000  |
| 67  | 8 | 0 | -10.584837 | -4.903556 | 0.000000  |
| 68  | 6 | 0 | -9.375336  | -5.632921 | 0.000000  |
| 69  | 1 | 0 | -12.703325 | 0.974960  | 0.000000  |
| 70  | 1 | 0 | -8.356568  | 3.347729  | 0.000000  |
| 71  | 1 | 0 | -8.356568  | -3.347729 | -0.000000 |
| 72  | 1 | 0 | -12.703325 | -0.974960 | -0.000000 |
| 73  | 1 | 0 | 12.703325  | -0.974960 | 0.000000  |
| 74  | 1 | 0 | 8.356568   | -3.347729 | 0.000000  |
| 75  | 1 | 0 | 8.356568   | 3.347729  | 0.000000  |
| 76  | 1 | 0 | 12.703325  | 0.974960  | 0.000000  |
| 77  | 1 | 0 | 14.218745  | 2.402643  | 0.894944  |
| 78  | 1 | 0 | 14.218745  | 2.402643  | -0.894944 |
| 79  | 1 | 0 | 14.821887  | 3.825791  | 0.000000  |
| 80  | 1 | 0 | 9.658399   | 6.684900  | 0.000000  |
| 81  | 1 | 0 | 8.780694   | 5.410709  | -0.894024 |
| 82  | 1 | 0 | 8.780694   | 5.410709  | 0.894024  |
| 83  | 1 | 0 | 14.218745  | -2.402643 | 0.894944  |
| 84  | 1 | 0 | 14.821887  | -3.825791 | -0.000000 |
| 85  | 1 | 0 | 14.218745  | -2.402643 | -0.894944 |
| 86  | 1 | 0 | 8.780694   | -5.410709 | -0.894024 |
| 87  | 1 | 0 | 8.780694   | -5.410709 | 0.894024  |
| 88  | 1 | 0 | 9.658399   | -6.684900 | -0.000000 |
| 89  | 1 | 0 | -9.658399  | 6.684900  | -0.000000 |
| 90  | 1 | 0 | -8.780694  | 5.410709  | -0.894024 |
| 91  | 1 | 0 | -8.780694  | 5.410709  | 0.894024  |
| 92  | 1 | 0 | -14.821887 | 3.825791  | -0.000000 |
| 93  | 1 | 0 | -14.218745 | 2.402643  | -0.894944 |
| 94  | 1 | 0 | -14.218745 | 2.402643  | 0.894944  |
| 95  | 1 | 0 | -14.821887 | -3.825791 | 0.000000  |
| 96  | 1 | 0 | -14.218745 | -2.402643 | 0.894944  |
| 97  | 1 | 0 | -14.218745 | -2.402643 | -0.894944 |
| 98  | 1 | 0 | -9.658399  | -6.684900 | 0.000000  |
| 99  | 1 | 0 | -8.780694  | -5.410709 | -0.894024 |
| 100 | 1 | 0 | -8.780694  | -5.410709 | 0.894024  |

-----  
No imaginary frequency.

Total energy = -2905.59461713 hartree.

**Table S11.** Cartesian Coordinates of **4'** at the B3LYP/6-31G(d) level

| Center<br>Number | Atomic<br>Number | Atomic<br>Type | Coordinates (Angstroms) |           |           |
|------------------|------------------|----------------|-------------------------|-----------|-----------|
|                  |                  |                | X                       | Y         | Z         |
| 1                | 6                | 0              | -10.500634              | 0.703672  | 0.000000  |
| 2                | 6                | 0              | -10.500634              | -0.703672 | -0.000000 |
| 3                | 6                | 0              | -11.744429              | -1.431406 | 0.000000  |
| 4                | 6                | 0              | -12.977540              | -0.725394 | 0.000000  |
| 5                | 6                | 0              | -12.977540              | 0.725394  | 0.000000  |
| 6                | 6                | 0              | -11.744429              | 1.431406  | 0.000000  |
| 7                | 6                | 0              | -14.174902              | 1.486569  | 0.000000  |
| 8                | 6                | 0              | -14.165326              | 2.867498  | 0.000000  |
| 9                | 6                | 0              | -12.917682              | 3.570170  | 0.000000  |
| 10               | 6                | 0              | -11.743898              | 2.850091  | 0.000000  |
| 11               | 6                | 0              | -11.743898              | -2.850091 | -0.000000 |
| 12               | 6                | 0              | -12.917682              | -3.570170 | -0.000000 |
| 13               | 6                | 0              | -14.165326              | -2.867498 | -0.000000 |
| 14               | 6                | 0              | -14.174902              | -1.486569 | -0.000000 |
| 15               | 6                | 0              | -9.265475               | 1.385143  | 0.000000  |
| 16               | 6                | 0              | -9.265475               | -1.385143 | -0.000000 |
| 17               | 6                | 0              | -8.152972               | 1.905194  | 0.000000  |
| 18               | 6                | 0              | -6.905744               | 2.407589  | 0.000000  |
| 19               | 6                | 0              | -5.733311               | 2.795989  | 0.000000  |
| 20               | 6                | 0              | -4.439898               | 3.135460  | 0.000000  |
| 21               | 6                | 0              | -3.226966               | 3.381916  | 0.000000  |
| 22               | 6                | 0              | -1.902891               | 3.551906  | 0.000000  |
| 23               | 6                | 0              | -0.667178               | 3.636363  | 0.000000  |
| 24               | 6                | 0              | 0.667178                | 3.636363  | 0.000000  |
| 25               | 6                | 0              | 1.902891                | 3.551906  | 0.000000  |
| 26               | 6                | 0              | 3.226966                | 3.381916  | 0.000000  |
| 27               | 6                | 0              | 4.439898                | 3.135460  | 0.000000  |
| 28               | 6                | 0              | 5.733311                | 2.795989  | 0.000000  |
| 29               | 6                | 0              | 6.905744                | 2.407589  | 0.000000  |
| 30               | 6                | 0              | 8.152972                | 1.905194  | 0.000000  |
| 31               | 6                | 0              | 9.265475                | 1.385143  | 0.000000  |
| 32               | 6                | 0              | 10.500634               | 0.703672  | 0.000000  |
| 33               | 6                | 0              | -8.152972               | -1.905194 | -0.000000 |
| 34               | 6                | 0              | -6.905744               | -2.407589 | -0.000000 |
| 35               | 6                | 0              | -5.733311               | -2.795989 | -0.000000 |
| 36               | 6                | 0              | -4.439898               | -3.135460 | -0.000000 |
| 37               | 6                | 0              | -3.226966               | -3.381916 | -0.000000 |
| 38               | 6                | 0              | -1.902891               | -3.551906 | -0.000000 |
| 39               | 6                | 0              | -0.667178               | -3.636363 | -0.000000 |
| 40               | 6                | 0              | 0.667178                | -3.636363 | 0.000000  |
| 41               | 6                | 0              | 1.902891                | -3.551906 | 0.000000  |
| 42               | 6                | 0              | 3.226966                | -3.381916 | 0.000000  |
| 43               | 6                | 0              | 4.439898                | -3.135460 | 0.000000  |
| 44               | 6                | 0              | 5.733311                | -2.795989 | 0.000000  |
| 45               | 6                | 0              | 6.905744                | -2.407589 | 0.000000  |
| 46               | 6                | 0              | 8.152972                | -1.905194 | 0.000000  |
| 47               | 6                | 0              | 9.265475                | -1.385143 | 0.000000  |
| 48               | 6                | 0              | 11.744429               | 1.431406  | 0.000000  |
| 49               | 6                | 0              | 12.977540               | 0.725394  | 0.000000  |
| 50               | 6                | 0              | 12.977540               | -0.725394 | 0.000000  |
| 51               | 6                | 0              | 11.744429               | -1.431406 | 0.000000  |
| 52               | 6                | 0              | 10.500634               | -0.703672 | 0.000000  |
| 53               | 6                | 0              | 11.743898               | 2.850091  | 0.000000  |
| 54               | 6                | 0              | 12.917682               | 3.570170  | 0.000000  |
| 55               | 6                | 0              | 14.165326               | 2.867498  | 0.000000  |
| 56               | 6                | 0              | 14.174902               | 1.486569  | 0.000000  |
| 57               | 6                | 0              | 14.174902               | -1.486569 | 0.000000  |
| 58               | 6                | 0              | 14.165326               | -2.867498 | 0.000000  |
| 59               | 6                | 0              | 12.917682               | -3.570170 | 0.000000  |
| 60               | 6                | 0              | 11.743898               | -2.850091 | 0.000000  |
| 61               | 8                | 0              | -13.015853              | 4.922590  | 0.000000  |
| 62               | 6                | 0              | -11.810228              | 5.674942  | 0.000000  |

|     |   |   |            |           |           |
|-----|---|---|------------|-----------|-----------|
| 63  | 8 | 0 | -15.266290 | 3.659930  | 0.000000  |
| 64  | 6 | 0 | -16.542366 | 3.040087  | 0.000000  |
| 65  | 8 | 0 | -15.266290 | -3.659930 | -0.000000 |
| 66  | 6 | 0 | -16.542366 | -3.040087 | -0.000000 |
| 67  | 8 | 0 | -13.015853 | -4.922590 | -0.000000 |
| 68  | 6 | 0 | -11.810228 | -5.674942 | -0.000000 |
| 69  | 8 | 0 | 13.015853  | 4.922590  | 0.000000  |
| 70  | 6 | 0 | 11.810228  | 5.674942  | 0.000000  |
| 71  | 8 | 0 | 15.266290  | 3.659930  | 0.000000  |
| 72  | 6 | 0 | 16.542366  | 3.040087  | 0.000000  |
| 73  | 8 | 0 | 15.266290  | -3.659930 | 0.000000  |
| 74  | 6 | 0 | 16.542366  | -3.040087 | 0.000000  |
| 75  | 8 | 0 | 13.015853  | -4.922590 | 0.000000  |
| 76  | 6 | 0 | 11.810228  | -5.674942 | 0.000000  |
| 77  | 1 | 0 | -15.128430 | 0.977376  | 0.000000  |
| 78  | 1 | 0 | -10.788776 | 3.360054  | 0.000000  |
| 79  | 1 | 0 | -10.788776 | -3.360054 | -0.000000 |
| 80  | 1 | 0 | -15.128430 | -0.977376 | -0.000000 |
| 81  | 1 | 0 | 10.788776  | 3.360054  | 0.000000  |
| 82  | 1 | 0 | 15.128430  | 0.977376  | 0.000000  |
| 83  | 1 | 0 | 15.128430  | -0.977376 | 0.000000  |
| 84  | 1 | 0 | 10.788776  | -3.360054 | 0.000000  |
| 85  | 1 | 0 | -11.209449 | 5.467872  | 0.894847  |
| 86  | 1 | 0 | -11.209449 | 5.467872  | -0.894847 |
| 87  | 1 | 0 | -12.114958 | 6.722574  | 0.000000  |
| 88  | 1 | 0 | -17.267925 | 3.855012  | 0.000000  |
| 89  | 1 | 0 | -16.688546 | 2.421872  | 0.895610  |
| 90  | 1 | 0 | -16.688546 | 2.421872  | -0.895610 |
| 91  | 1 | 0 | -17.267925 | -3.855012 | -0.000000 |
| 92  | 1 | 0 | -16.688546 | -2.421872 | -0.895610 |
| 93  | 1 | 0 | -16.688546 | -2.421872 | 0.895610  |
| 94  | 1 | 0 | -12.114958 | -6.722574 | -0.000000 |
| 95  | 1 | 0 | -11.209449 | -5.467872 | 0.894847  |
| 96  | 1 | 0 | -11.209449 | -5.467872 | -0.894847 |
| 97  | 1 | 0 | 12.114958  | 6.722574  | 0.000000  |
| 98  | 1 | 0 | 11.209449  | 5.467872  | 0.894847  |
| 99  | 1 | 0 | 11.209449  | 5.467872  | -0.894847 |
| 100 | 1 | 0 | 17.267925  | 3.855012  | 0.000000  |
| 101 | 1 | 0 | 16.688546  | 2.421872  | -0.895610 |
| 102 | 1 | 0 | 16.688546  | 2.421872  | 0.895610  |
| 103 | 1 | 0 | 17.267925  | -3.855012 | 0.000000  |
| 104 | 1 | 0 | 16.688546  | -2.421872 | 0.895610  |
| 105 | 1 | 0 | 16.688546  | -2.421872 | -0.895610 |
| 106 | 1 | 0 | 11.209449  | -5.467872 | -0.894847 |
| 107 | 1 | 0 | 11.209449  | -5.467872 | 0.894847  |
| 108 | 1 | 0 | 12.114958  | -6.722574 | 0.000000  |

-----  
No imaginary frequency.

Total energy = -3211.41128931 hartree.

**Table S12.** Cartesian Coordinates of **4'** at the M06-2X/6-31G(d) level

| Center<br>Number | Atomic<br>Number | Atomic<br>Type | Coordinates (Angstroms) |           |           |
|------------------|------------------|----------------|-------------------------|-----------|-----------|
|                  |                  |                | X                       | Y         | Z         |
| 1                | 6                | 0              | -10.551948              | 0.694809  | 0.000000  |
| 2                | 6                | 0              | -10.551948              | -0.694809 | -0.000000 |
| 3                | 6                | 0              | -11.788878              | -1.425430 | 0.000000  |
| 4                | 6                | 0              | -13.013263              | -0.724449 | 0.000000  |
| 5                | 6                | 0              | -13.013263              | 0.724449  | 0.000000  |
| 6                | 6                | 0              | -11.788878              | 1.425430  | 0.000000  |
| 7                | 6                | 0              | -14.211999              | 1.482370  | 0.000000  |
| 8                | 6                | 0              | -14.195973              | 2.857074  | 0.000000  |
| 9                | 6                | 0              | -12.948791              | 3.557879  | 0.000000  |
| 10               | 6                | 0              | -11.778635              | 2.843075  | 0.000000  |
| 11               | 6                | 0              | -11.778635              | -2.843075 | -0.000000 |
| 12               | 6                | 0              | -12.948791              | -3.557879 | -0.000000 |

|    |   |   |            |           |           |
|----|---|---|------------|-----------|-----------|
| 13 | 6 | 0 | -14.195973 | -2.857074 | -0.000000 |
| 14 | 6 | 0 | -14.211999 | -1.482370 | -0.000000 |
| 15 | 6 | 0 | -9.305707  | 1.376990  | 0.000000  |
| 16 | 6 | 0 | -9.305707  | -1.376990 | -0.000000 |
| 17 | 6 | 0 | -8.196795  | 1.880311  | 0.000000  |
| 18 | 6 | 0 | -6.925130  | 2.370998  | 0.000000  |
| 19 | 6 | 0 | -5.761087  | 2.741067  | 0.000000  |
| 20 | 6 | 0 | -4.444646  | 3.074754  | 0.000000  |
| 21 | 6 | 0 | -3.245467  | 3.312689  | 0.000000  |
| 22 | 6 | 0 | -1.898733  | 3.481876  | 0.000000  |
| 23 | 6 | 0 | -0.678611  | 3.563782  | 0.000000  |
| 24 | 6 | 0 | 0.678611   | 3.563782  | 0.000000  |
| 25 | 6 | 0 | 1.898733   | 3.481876  | 0.000000  |
| 26 | 6 | 0 | 3.245467   | 3.312689  | 0.000000  |
| 27 | 6 | 0 | 4.444646   | 3.074754  | 0.000000  |
| 28 | 6 | 0 | 5.761087   | 2.741067  | 0.000000  |
| 29 | 6 | 0 | 6.925130   | 2.370998  | 0.000000  |
| 30 | 6 | 0 | 8.196795   | 1.880311  | 0.000000  |
| 31 | 6 | 0 | 9.305707   | 1.376990  | 0.000000  |
| 32 | 6 | 0 | 10.551948  | 0.694809  | 0.000000  |
| 33 | 6 | 0 | -8.196795  | -1.880311 | -0.000000 |
| 34 | 6 | 0 | -6.925130  | -2.370998 | -0.000000 |
| 35 | 6 | 0 | -5.761087  | -2.741067 | -0.000000 |
| 36 | 6 | 0 | -4.444646  | -3.074754 | -0.000000 |
| 37 | 6 | 0 | -3.245467  | -3.312689 | -0.000000 |
| 38 | 6 | 0 | -1.898733  | -3.481876 | -0.000000 |
| 39 | 6 | 0 | -0.678611  | -3.563782 | -0.000000 |
| 40 | 6 | 0 | 0.678611   | -3.563782 | 0.000000  |
| 41 | 6 | 0 | 1.898733   | -3.481876 | 0.000000  |
| 42 | 6 | 0 | 3.245467   | -3.312689 | 0.000000  |
| 43 | 6 | 0 | 4.444646   | -3.074754 | 0.000000  |
| 44 | 6 | 0 | 5.761087   | -2.741067 | 0.000000  |
| 45 | 6 | 0 | 6.925130   | -2.370998 | 0.000000  |
| 46 | 6 | 0 | 8.196795   | -1.880311 | 0.000000  |
| 47 | 6 | 0 | 9.305707   | -1.376990 | 0.000000  |
| 48 | 6 | 0 | 11.788878  | 1.425430  | 0.000000  |
| 49 | 6 | 0 | 13.013263  | 0.724449  | 0.000000  |
| 50 | 6 | 0 | 13.013263  | -0.724449 | 0.000000  |
| 51 | 6 | 0 | 11.788878  | -1.425430 | 0.000000  |
| 52 | 6 | 0 | 10.551948  | -0.694809 | 0.000000  |
| 53 | 6 | 0 | 11.778635  | 2.843075  | 0.000000  |
| 54 | 6 | 0 | 12.948791  | 3.557879  | 0.000000  |
| 55 | 6 | 0 | 14.195973  | 2.857074  | 0.000000  |
| 56 | 6 | 0 | 14.211999  | 1.482370  | 0.000000  |
| 57 | 6 | 0 | 14.211999  | -1.482370 | 0.000000  |
| 58 | 6 | 0 | 14.195973  | -2.857074 | 0.000000  |
| 59 | 6 | 0 | 12.948791  | -3.557879 | 0.000000  |
| 60 | 6 | 0 | 11.778635  | -2.843075 | 0.000000  |
| 61 | 8 | 0 | -13.049629 | 4.903224  | 0.000000  |
| 62 | 6 | 0 | -11.840682 | 5.633732  | 0.000000  |
| 63 | 8 | 0 | -15.287382 | 3.650933  | 0.000000  |
| 64 | 6 | 0 | -16.549292 | 3.021426  | 0.000000  |
| 65 | 8 | 0 | -15.287382 | -3.650933 | -0.000000 |
| 66 | 6 | 0 | -16.549292 | -3.021426 | -0.000000 |
| 67 | 8 | 0 | -13.049629 | -4.903224 | -0.000000 |
| 68 | 6 | 0 | -11.840682 | -5.633732 | -0.000000 |
| 69 | 8 | 0 | 13.049629  | 4.903224  | 0.000000  |
| 70 | 6 | 0 | 11.840682  | 5.633732  | 0.000000  |
| 71 | 8 | 0 | 15.287382  | 3.650933  | 0.000000  |
| 72 | 6 | 0 | 16.549292  | 3.021426  | 0.000000  |
| 73 | 8 | 0 | 15.287382  | -3.650933 | 0.000000  |
| 74 | 6 | 0 | 16.549292  | -3.021426 | 0.000000  |
| 75 | 8 | 0 | 13.049629  | -4.903224 | 0.000000  |
| 76 | 6 | 0 | 11.840682  | -5.633732 | 0.000000  |
| 77 | 1 | 0 | -15.165998 | 0.974046  | 0.000000  |
| 78 | 1 | 0 | -10.820705 | 3.349262  | 0.000000  |
| 79 | 1 | 0 | -10.820705 | -3.349262 | -0.000000 |
| 80 | 1 | 0 | -15.165998 | -0.974046 | -0.000000 |
| 81 | 1 | 0 | 10.820705  | 3.349262  | 0.000000  |

|     |   |   |            |           |           |
|-----|---|---|------------|-----------|-----------|
| 82  | 1 | 0 | 15.165998  | 0.974046  | 0.000000  |
| 83  | 1 | 0 | 15.165998  | -0.974046 | 0.000000  |
| 84  | 1 | 0 | 10.820705  | -3.349262 | 0.000000  |
| 85  | 1 | 0 | -11.245981 | 5.412015  | 0.894093  |
| 86  | 1 | 0 | -11.245981 | 5.412015  | -0.894093 |
| 87  | 1 | 0 | -12.124746 | 6.685408  | 0.000000  |
| 88  | 1 | 0 | -17.285853 | 3.824308  | 0.000000  |
| 89  | 1 | 0 | -16.682618 | 2.401245  | 0.895007  |
| 90  | 1 | 0 | -16.682618 | 2.401245  | -0.895007 |
| 91  | 1 | 0 | -17.285853 | -3.824308 | -0.000000 |
| 92  | 1 | 0 | -16.682618 | -2.401245 | -0.895007 |
| 93  | 1 | 0 | -16.682618 | -2.401245 | 0.895007  |
| 94  | 1 | 0 | -12.124746 | -6.685408 | -0.000000 |
| 95  | 1 | 0 | -11.245981 | -5.412015 | 0.894093  |
| 96  | 1 | 0 | -11.245981 | -5.412015 | -0.894093 |
| 97  | 1 | 0 | 12.124746  | 6.685408  | 0.000000  |
| 98  | 1 | 0 | 11.245981  | 5.412015  | 0.894093  |
| 99  | 1 | 0 | 11.245981  | 5.412015  | -0.894093 |
| 100 | 1 | 0 | 17.285853  | 3.824308  | 0.000000  |
| 101 | 1 | 0 | 16.682618  | 2.401245  | -0.895007 |
| 102 | 1 | 0 | 16.682618  | 2.401245  | 0.895007  |
| 103 | 1 | 0 | 17.285853  | -3.824308 | 0.000000  |
| 104 | 1 | 0 | 16.682618  | -2.401245 | 0.895007  |
| 105 | 1 | 0 | 16.682618  | -2.401245 | -0.895007 |
| 106 | 1 | 0 | 11.245981  | -5.412015 | -0.894093 |
| 107 | 1 | 0 | 11.245981  | -5.412015 | 0.894093  |
| 108 | 1 | 0 | 12.124746  | -6.685408 | 0.000000  |

-----  
No imaginary frequency.

Total energy = -3210.10749326 hartree.

**Table S13.** Cartesian Coordinates of  $1'_2$  at the B3LYP-D3/6-31G(d) level

| Center<br>Number | Atomic<br>Number | Atomic<br>Type | Coordinates (Angstroms) |           |           |
|------------------|------------------|----------------|-------------------------|-----------|-----------|
|                  |                  |                | X                       | Y         | Z         |
| 1                | 6                | 0              | 7.572555                | 0.724679  | -1.042187 |
| 2                | 6                | 0              | 6.341911                | 1.425231  | -1.164633 |
| 3                | 6                | 0              | 5.112444                | 0.701333  | -1.321550 |
| 4                | 6                | 0              | 5.112480                | -0.701393 | -1.321530 |
| 5                | 6                | 0              | 6.341990                | -1.425233 | -1.164670 |
| 6                | 6                | 0              | 7.572601                | -0.724621 | -1.042254 |
| 7                | 6                | 0              | 8.756752                | 1.494361  | -0.893246 |
| 8                | 6                | 0              | 8.729132                | 2.874294  | -0.834631 |
| 9                | 6                | 0              | 7.480114                | 3.568674  | -0.922415 |
| 10               | 6                | 0              | 6.325189                | 2.841492  | -1.102630 |
| 11               | 6                | 0              | 6.325352                | -2.841497 | -1.102753 |
| 12               | 6                | 0              | 7.480334                | -3.568631 | -0.922704 |
| 13               | 6                | 0              | 8.729322                | -2.874187 | -0.834998 |
| 14               | 6                | 0              | 8.756859                | -1.494247 | -0.893501 |
| 15               | 6                | 0              | 3.862962                | 1.365757  | -1.448562 |
| 16               | 6                | 0              | 3.863023                | -1.365871 | -1.448426 |
| 17               | 6                | 0              | 2.679731                | 1.654673  | -1.549336 |
| 18               | 6                | 0              | 2.679799                | -1.654850 | -1.549072 |
| 19               | 6                | 0              | 1.321103                | 1.658892  | -1.640188 |
| 20               | 6                | 0              | 1.321183                | -1.659405 | -1.640112 |
| 21               | 6                | 0              | 0.136387                | -1.364233 | -1.704055 |
| 22               | 6                | 0              | -1.119789               | -0.702422 | -1.780624 |
| 23               | 6                | 0              | -1.119820               | 0.701690  | -1.780692 |
| 24               | 6                | 0              | -2.357052               | 1.423839  | -1.840296 |
| 25               | 6                | 0              | -3.585229               | 0.722928  | -1.977227 |
| 26               | 6                | 0              | -3.585183               | -0.723849 | -1.977133 |
| 27               | 6                | 0              | -2.356969               | -1.424664 | -1.840110 |
| 28               | 6                | 0              | 0.136349                | 1.363521  | -1.704079 |
| 29               | 6                | 0              | -4.777980               | -1.484717 | -2.058493 |
| 30               | 6                | 0              | -4.775031               | -2.860155 | -1.954637 |
| 31               | 6                | 0              | -3.540295               | -3.551431 | -1.750730 |

|     |   |   |           |           |           |
|-----|---|---|-----------|-----------|-----------|
| 32  | 6 | 0 | -2.363637 | -2.838780 | -1.727178 |
| 33  | 6 | 0 | -2.363820 | 2.837971  | -1.727579 |
| 34  | 6 | 0 | -3.540524 | 3.550542  | -1.751320 |
| 35  | 6 | 0 | -4.775210 | 2.859159  | -1.955073 |
| 36  | 6 | 0 | -4.778079 | 1.483699  | -2.058651 |
| 37  | 8 | 0 | 7.552392  | -4.915146 | -0.785947 |
| 38  | 6 | 0 | 6.323965  | -5.640635 | -0.743518 |
| 39  | 8 | 0 | 9.817450  | -3.673494 | -0.664006 |
| 40  | 6 | 0 | 11.090435 | -3.057452 | -0.568963 |
| 41  | 8 | 0 | 9.817199  | 3.673644  | -0.663448 |
| 42  | 6 | 0 | 11.090210 | 3.057665  | -0.568337 |
| 43  | 8 | 0 | 7.552078  | 4.915176  | -0.785494 |
| 44  | 6 | 0 | 6.323584  | 5.640572  | -0.743389 |
| 45  | 8 | 0 | -3.651169 | -4.900675 | -1.583251 |
| 46  | 6 | 0 | -2.465698 | -5.621582 | -1.281527 |
| 47  | 8 | 0 | -5.878545 | -3.652713 | -2.008326 |
| 48  | 6 | 0 | -7.128723 | -3.040468 | -2.299664 |
| 49  | 8 | 0 | -5.878800 | 3.651619  | -2.008790 |
| 50  | 6 | 0 | -7.128814 | 3.039330  | -2.300714 |
| 51  | 8 | 0 | -3.651490 | 4.899825  | -1.584141 |
| 52  | 6 | 0 | -2.466322 | 5.620697  | -1.281110 |
| 53  | 1 | 0 | 9.709521  | 0.990030  | -0.809921 |
| 54  | 1 | 0 | 5.365768  | 3.339967  | -1.156672 |
| 55  | 1 | 0 | 5.365959  | -3.340030 | -1.156750 |
| 56  | 1 | 0 | 9.709608  | -0.989867 | -0.810247 |
| 57  | 1 | 0 | -5.725971 | -0.978211 | -2.166763 |
| 58  | 1 | 0 | -1.413326 | -3.338588 | -1.586826 |
| 59  | 1 | 0 | -1.413552 | 3.337878  | -1.587287 |
| 60  | 1 | 0 | -5.726058 | 0.977116  | -2.166658 |
| 61  | 1 | 0 | 6.608724  | -6.684162 | -0.596013 |
| 62  | 1 | 0 | 5.775958  | -5.546224 | -1.690911 |
| 63  | 1 | 0 | 5.693969  | -5.304587 | 0.087469  |
| 64  | 1 | 0 | 11.807708 | -3.871239 | -0.447877 |
| 65  | 1 | 0 | 11.333518 | -2.489576 | -1.477754 |
| 66  | 1 | 0 | 11.151260 | -2.386722 | 0.299994  |
| 67  | 1 | 0 | 11.807426 | 3.871481  | -0.447117 |
| 68  | 1 | 0 | 11.333408 | 2.489876  | -1.477152 |
| 69  | 1 | 0 | 11.150989 | 2.386866  | 0.300570  |
| 70  | 1 | 0 | 5.775929  | 5.546267  | -1.690999 |
| 71  | 1 | 0 | 6.608220  | 6.684090  | -0.595601 |
| 72  | 1 | 0 | 5.693321  | 5.304319  | 0.087313  |
| 73  | 1 | 0 | -1.993485 | -5.246409 | -0.363328 |
| 74  | 1 | 0 | -2.775382 | -6.658580 | -1.138332 |
| 75  | 1 | 0 | -1.741471 | -5.568585 | -2.105432 |
| 76  | 1 | 0 | -7.866666 | -3.842710 | -2.250752 |
| 77  | 1 | 0 | -7.386854 | -2.276198 | -1.558957 |
| 78  | 1 | 0 | -7.120914 | -2.594778 | -3.303677 |
| 79  | 1 | 0 | -7.866755 | 3.841619  | -2.252534 |
| 80  | 1 | 0 | -7.120396 | 2.593326  | -3.304583 |
| 81  | 1 | 0 | -7.387438 | 2.275309  | -1.559919 |
| 82  | 1 | 0 | -1.994937 | 5.245221  | -0.362612 |
| 83  | 1 | 0 | -1.741340 | 5.568028  | -2.104372 |
| 84  | 1 | 0 | -2.776184 | 6.657639  | -1.137882 |
| 85  | 6 | 0 | 3.585088  | 0.723572  | 1.977767  |
| 86  | 6 | 0 | 2.356870  | 1.424416  | 1.840932  |
| 87  | 6 | 0 | 1.119682  | 0.702194  | 1.781517  |
| 88  | 6 | 0 | 1.119689  | -0.701905 | 1.781589  |
| 89  | 6 | 0 | 2.356899  | -1.424086 | 1.840989  |
| 90  | 6 | 0 | 3.585104  | -0.723212 | 1.977778  |
| 91  | 6 | 0 | 4.777900  | 1.484437  | 2.058984  |
| 92  | 6 | 0 | 4.774939  | 2.859886  | 1.955213  |
| 93  | 6 | 0 | 3.540195  | 3.551176  | 1.751382  |
| 94  | 6 | 0 | 2.363535  | 2.838527  | 1.728007  |
| 95  | 6 | 0 | 2.363584  | -2.838200 | 1.728072  |
| 96  | 6 | 0 | 3.540260  | -3.550822 | 1.751428  |
| 97  | 6 | 0 | 4.774987  | -2.859499 | 1.955237  |
| 98  | 6 | 0 | 4.777933  | -1.484049 | 2.058970  |
| 99  | 6 | 0 | -0.136487 | 1.363984  | 1.704769  |
| 100 | 6 | 0 | -0.136495 | -1.363684 | 1.704963  |



|     |   |   |            |           |           |
|-----|---|---|------------|-----------|-----------|
| 101 | 6 | 0 | -1.321239  | 1.659344  | 1.640930  |
| 102 | 6 | 0 | -1.321285  | -1.658906 | 1.641114  |
| 103 | 6 | 0 | -2.679850  | 1.655028  | 1.549930  |
| 104 | 6 | 0 | -2.679915  | -1.654584 | 1.550293  |
| 105 | 6 | 0 | -3.863107  | -1.365543 | 1.449452  |
| 106 | 6 | 0 | -5.112520  | -0.701069 | 1.322129  |
| 107 | 6 | 0 | -5.112506  | 0.701650  | 1.321944  |
| 108 | 6 | 0 | -6.341919  | 1.425497  | 1.164474  |
| 109 | 6 | 0 | -7.572492  | 0.724916  | 1.041486  |
| 110 | 6 | 0 | -7.572508  | -0.724393 | 1.041694  |
| 111 | 6 | 0 | -6.341946  | -1.424966 | 1.164888  |
| 112 | 6 | 0 | -3.863071  | 1.366113  | 1.449081  |
| 113 | 6 | 0 | -8.756639  | -1.494064 | 0.892183  |
| 114 | 6 | 0 | -8.728998  | -2.874003 | 0.833672  |
| 115 | 6 | 0 | -7.480062  | -3.568402 | 0.922320  |
| 116 | 6 | 0 | -6.325230  | -2.841238 | 1.103155  |
| 117 | 6 | 0 | -6.325149  | 2.841741  | 1.102347  |
| 118 | 6 | 0 | -7.479954  | 3.568899  | 0.921351  |
| 119 | 6 | 0 | -8.728916  | 2.874513  | 0.832912  |
| 120 | 6 | 0 | -8.756600  | 1.494584  | 0.891795  |
| 121 | 8 | 0 | 3.651153   | -4.900042 | 1.583812  |
| 122 | 6 | 0 | 2.465646   | -5.621007 | 1.282390  |
| 123 | 8 | 0 | 5.878521   | -3.652019 | 2.009030  |
| 124 | 6 | 0 | 7.128711   | -3.039619 | 2.299998  |
| 125 | 8 | 0 | 5.878471   | 3.652417  | 2.008990  |
| 126 | 6 | 0 | 7.128643   | 3.040039  | 2.300076  |
| 127 | 8 | 0 | 3.651034   | 4.900406  | 1.583795  |
| 128 | 6 | 0 | 2.465547   | 5.621284  | 1.282064  |
| 129 | 8 | 0 | -7.552003  | -4.914930 | 0.785563  |
| 130 | 6 | 0 | -6.323680  | -5.640705 | 0.746160  |
| 131 | 8 | 0 | -9.816967  | -3.673346 | 0.661778  |
| 132 | 6 | 0 | -11.089896 | -3.057342 | 0.565717  |
| 133 | 8 | 0 | -9.816874  | 3.673847  | 0.660907  |
| 134 | 6 | 0 | -11.089819 | 3.057858  | 0.564980  |
| 135 | 8 | 0 | -7.551836  | 4.915380  | 0.784181  |
| 136 | 6 | 0 | -6.323489  | 5.641156  | 0.745226  |
| 137 | 1 | 0 | 5.725910   | 0.977929  | 2.167092  |
| 138 | 1 | 0 | 1.413208   | 3.338347  | 1.587816  |
| 139 | 1 | 0 | 1.413268   | -3.338034 | 1.587852  |
| 140 | 1 | 0 | 5.725939   | -0.977523 | 2.167031  |
| 141 | 1 | 0 | -9.709353  | -0.989725 | 0.808287  |
| 142 | 1 | 0 | -5.365860  | -3.339742 | 1.157844  |
| 143 | 1 | 0 | -5.365749  | 3.340216  | 1.156744  |
| 144 | 1 | 0 | -9.709335  | 0.990256  | 0.808068  |
| 145 | 1 | 0 | 2.775370   | -6.657958 | 1.138933  |
| 146 | 1 | 0 | 1.993088   | -5.245756 | 0.364400  |
| 147 | 1 | 0 | 1.741693   | -5.568184 | 2.106548  |
| 148 | 1 | 0 | 7.866632   | -3.841919 | 2.251705  |
| 149 | 1 | 0 | 7.386854   | -2.275835 | 1.558791  |
| 150 | 1 | 0 | 7.120907   | -2.593279 | 3.303725  |
| 151 | 1 | 0 | 7.866537   | 3.842373  | 2.251951  |
| 152 | 1 | 0 | 7.386914   | 2.276340  | 1.558819  |
| 153 | 1 | 0 | 7.120722   | 2.593598  | 3.303756  |
| 154 | 1 | 0 | 1.993036   | 5.245736  | 0.364174  |
| 155 | 1 | 0 | 2.775288   | 6.658183  | 1.138276  |
| 156 | 1 | 0 | 1.741553   | 5.568733  | 2.106205  |
| 157 | 1 | 0 | -5.777851  | -5.545985 | 1.694789  |
| 158 | 1 | 0 | -6.608371  | -6.684224 | 0.598483  |
| 159 | 1 | 0 | -5.691489  | -5.305387 | -0.083468 |
| 160 | 1 | 0 | -11.807036 | -3.871147 | 0.443968  |
| 161 | 1 | 0 | -11.333762 | -2.489546 | 1.474348  |
| 162 | 1 | 0 | -11.150014 | -2.386547 | -0.303238 |
| 163 | 1 | 0 | -11.806939 | 3.871657  | 0.443075  |
| 164 | 1 | 0 | -11.149959 | 2.386892  | -0.303842 |
| 165 | 1 | 0 | -11.333695 | 2.490247  | 1.473724  |
| 166 | 1 | 0 | -5.777879  | 5.546248  | 1.693958  |
| 167 | 1 | 0 | -5.691131  | 5.306008  | -0.084332 |
| 168 | 1 | 0 | -6.608163  | 6.684710  | 0.597735  |

No imaginary frequency.

Total energy = -4595.18769962 hartree.

**Table S14.** Cartesian Coordinates of  $2'_2$  at the B3LYP-D3/6-31G(d) level

| Center<br>Number | Atomic<br>Number | Atomic<br>Type | Coordinates (Angstroms) |           |           |
|------------------|------------------|----------------|-------------------------|-----------|-----------|
|                  |                  |                | X                       | Y         | Z         |
| 1                | 6                | 0              | 10.027277               | 0.725626  | -1.146579 |
| 2                | 6                | 0              | 8.796830                | 1.428410  | -1.245012 |
| 3                | 6                | 0              | 7.562258                | 0.701796  | -1.379866 |
| 4                | 6                | 0              | 7.562300                | -0.701414 | -1.380101 |
| 5                | 6                | 0              | 8.796884                | -1.428057 | -1.245460 |
| 6                | 6                | 0              | 10.027303               | -0.725268 | -1.146760 |
| 7                | 6                | 0              | 11.215163               | 1.492412  | -1.019343 |
| 8                | 6                | 0              | 11.191572               | 2.872741  | -0.958643 |
| 9                | 6                | 0              | 9.942722                | 3.569474  | -1.022440 |
| 10               | 6                | 0              | 8.783160                | 2.843780  | -1.181754 |
| 11               | 6                | 0              | 8.783255                | -2.843450 | -1.182656 |
| 12               | 6                | 0              | 9.942826                | -3.569143 | -1.023447 |
| 13               | 6                | 0              | 11.191652               | -2.872389 | -0.959308 |
| 14               | 6                | 0              | 11.215208               | -1.492046 | -1.019618 |
| 15               | 8                | 0              | 12.283303               | 3.668910  | -0.806994 |
| 16               | 8                | 0              | 10.019619               | 4.914504  | -0.886810 |
| 17               | 6                | 0              | 8.794088                | 5.645382  | -0.831372 |
| 18               | 6                | 0              | 13.558134               | 3.051739  | -0.739034 |
| 19               | 8                | 0              | 12.283385               | -3.668574 | -0.807756 |
| 20               | 8                | 0              | 10.019755               | -4.914202 | -0.888202 |
| 21               | 6                | 0              | 8.794285                | -5.645246 | -0.833762 |
| 22               | 6                | 0              | 13.558186               | -3.051385 | -0.739410 |
| 23               | 6                | 0              | 6.324677                | 1.374137  | -1.482493 |
| 24               | 6                | 0              | 6.324788                | -1.373827 | -1.482902 |
| 25               | 6                | 0              | 5.171866                | 1.782073  | -1.554483 |
| 26               | 6                | 0              | 3.864205                | 2.105008  | -1.613706 |
| 27               | 6                | 0              | 2.637208                | 2.210022  | -1.653053 |
| 28               | 6                | 0              | 5.172089                | -1.782056 | -1.554923 |
| 29               | 6                | 0              | 3.864450                | -2.105089 | -1.614060 |
| 30               | 6                | 0              | 2.637431                | -2.209901 | -1.653117 |
| 31               | 6                | 0              | -6.114699               | -0.724216 | -1.954697 |
| 32               | 6                | 0              | -4.886395               | -1.426344 | -1.835393 |
| 33               | 6                | 0              | -3.645375               | -0.701834 | -1.802465 |
| 34               | 6                | 0              | -3.645650               | 0.703292  | -1.802602 |
| 35               | 6                | 0              | -4.886982               | 1.427265  | -1.835817 |
| 36               | 6                | 0              | -6.114990               | 0.724564  | -1.954939 |
| 37               | 6                | 0              | -7.309025               | -1.484160 | -2.014519 |
| 38               | 6                | 0              | -7.305983               | -2.859476 | -1.900141 |
| 39               | 6                | 0              | -6.069592               | -3.550453 | -1.706381 |
| 40               | 6                | 0              | -4.891753               | -2.838391 | -1.712330 |
| 41               | 6                | 0              | -4.893007               | 2.839352  | -1.713278 |
| 42               | 6                | 0              | -6.071171               | 3.550903  | -1.707778 |
| 43               | 6                | 0              | -7.307267               | 2.859303  | -1.901198 |
| 44               | 6                | 0              | -7.309644               | 1.483952  | -2.015124 |
| 45               | 8                | 0              | -8.410567               | -3.650178 | -1.929155 |
| 46               | 8                | 0              | -6.177008               | -4.894827 | -1.514653 |
| 47               | 6                | 0              | -4.988696               | -5.606415 | -1.190462 |
| 48               | 6                | 0              | -9.665571               | -3.039919 | -2.204413 |
| 49               | 8                | 0              | -8.412287               | 3.649410  | -1.930674 |
| 50               | 8                | 0              | -6.179127               | 4.895354  | -1.516813 |
| 51               | 6                | 0              | -4.991094               | 5.607663  | -1.193208 |
| 52               | 6                | 0              | -9.666942               | 3.038212  | -2.205387 |
| 53               | 6                | 0              | -2.400731               | -1.369950 | -1.767189 |
| 54               | 6                | 0              | -2.401221               | 1.371835  | -1.767338 |
| 55               | 6                | 0              | -1.240782               | -1.765167 | -1.749878 |
| 56               | 6                | 0              | 0.070695                | -2.075095 | -1.725190 |
| 57               | 6                | 0              | 1.295055                | -2.207903 | -1.694242 |
| 58               | 6                | 0              | -1.241204               | 1.766862  | -1.749890 |
| 59               | 6                | 0              | 0.070388                | 2.076362  | -1.725353 |

|     |   |   |            |           |           |
|-----|---|---|------------|-----------|-----------|
| 60  | 6 | 0 | 1.294829   | 2.208403  | -1.694263 |
| 61  | 1 | 0 | 12.168552  | 0.986767  | -0.954809 |
| 62  | 1 | 0 | 7.825010   | 3.345832  | -1.217904 |
| 63  | 1 | 0 | 7.825136   | -3.345544 | -1.219022 |
| 64  | 1 | 0 | 12.168565  | -0.986385 | -0.954728 |
| 65  | 1 | 0 | 9.085139   | 6.687908  | -0.690423 |
| 66  | 1 | 0 | 8.234842   | 5.550151  | -1.771919 |
| 67  | 1 | 0 | 8.173206   | 5.314140  | 0.008203  |
| 68  | 1 | 0 | 14.277768  | 3.865127  | -0.631071 |
| 69  | 1 | 0 | 13.781857  | 2.485874  | -1.653861 |
| 70  | 1 | 0 | 13.635883  | 2.379689  | 0.127390  |
| 71  | 1 | 0 | 9.085405   | -6.687815 | -0.693273 |
| 72  | 1 | 0 | 8.235506   | -5.549535 | -1.774534 |
| 73  | 1 | 0 | 8.172880   | -5.314640 | 0.005688  |
| 74  | 1 | 0 | 14.277834  | -3.864785 | -0.631628 |
| 75  | 1 | 0 | 13.635797  | -2.379631 | 0.127256  |
| 76  | 1 | 0 | 13.782017  | -2.485197 | -1.654011 |
| 77  | 1 | 0 | -8.258152  | -0.977683 | -2.112374 |
| 78  | 1 | 0 | -3.941260  | -3.339352 | -1.580107 |
| 79  | 1 | 0 | -3.942748  | 3.340817  | -1.581265 |
| 80  | 1 | 0 | -8.258500  | 0.977005  | -2.113141 |
| 81  | 1 | 0 | -5.299211  | -6.637231 | -1.010816 |
| 82  | 1 | 0 | -4.268157  | -5.582587 | -2.018396 |
| 83  | 1 | 0 | -4.514543  | -5.198333 | -0.288009 |
| 84  | 1 | 0 | -10.402420 | -3.841738 | -2.136920 |
| 85  | 1 | 0 | -9.910934  | -2.269916 | -1.465137 |
| 86  | 1 | 0 | -9.674520  | -2.602047 | -3.211712 |
| 87  | 1 | 0 | -5.302034  | 6.638478  | -1.014304 |
| 88  | 1 | 0 | -4.270583  | 5.583521  | -2.021154 |
| 89  | 1 | 0 | -4.516735  | 5.200445  | -0.290473 |
| 90  | 1 | 0 | -10.404311 | 3.839564  | -2.137963 |
| 91  | 1 | 0 | -9.675869  | 2.599997  | -3.212540 |
| 92  | 1 | 0 | -9.911602  | 2.268315  | -1.465770 |
| 93  | 6 | 0 | 6.114969   | 0.724104  | 1.954097  |
| 94  | 6 | 0 | 4.886853   | 1.426554  | 1.834696  |
| 95  | 6 | 0 | 3.645667   | 0.702350  | 1.801158  |
| 96  | 6 | 0 | 3.645634   | -0.702779 | 1.800957  |
| 97  | 6 | 0 | 4.886796   | -1.427044 | 1.834204  |
| 98  | 6 | 0 | 6.114943   | -0.724681 | 1.953850  |
| 99  | 6 | 0 | 7.309432   | 1.483759  | 2.014696  |
| 100 | 6 | 0 | 7.306797   | 2.859149  | 1.901028  |
| 101 | 6 | 0 | 6.070598   | 3.550504  | 1.707379  |
| 102 | 6 | 0 | 4.892605   | 2.838656  | 1.712380  |
| 103 | 6 | 0 | 4.892512   | -2.839102 | 1.711269  |
| 104 | 6 | 0 | 6.070502   | -3.550950 | 1.705864  |
| 105 | 6 | 0 | 7.306710   | -2.859729 | 1.899935  |
| 106 | 6 | 0 | 7.309382   | -1.484391 | 2.014200  |
| 107 | 8 | 0 | 8.411606   | 3.649514  | 1.931015  |
| 108 | 8 | 0 | 6.178274   | 4.895046  | 1.516839  |
| 109 | 6 | 0 | 4.990073   | 5.607331  | 1.193809  |
| 110 | 6 | 0 | 9.666341   | 3.038606  | 2.206031  |
| 111 | 8 | 0 | 8.411479   | -3.650157 | 1.929673  |
| 112 | 8 | 0 | 6.178197   | -4.895370 | 1.514500  |
| 113 | 6 | 0 | 4.990056   | -5.607415 | 1.190697  |
| 114 | 6 | 0 | 9.666204   | -3.039430 | 2.205145  |
| 115 | 6 | 0 | 2.401158   | 1.370719  | 1.765796  |
| 116 | 6 | 0 | 2.401082   | -1.371089 | 1.765553  |
| 117 | 6 | 0 | 1.241177   | 1.765847  | 1.748356  |
| 118 | 6 | 0 | -0.070312  | 2.075723  | 1.723536  |
| 119 | 6 | 0 | -1.294706  | 2.208102  | 1.692203  |
| 120 | 6 | 0 | 1.241069   | -1.766134 | 1.748210  |
| 121 | 6 | 0 | -0.070457  | -2.075911 | 1.723571  |
| 122 | 6 | 0 | -1.294862  | -2.208301 | 1.692514  |
| 123 | 6 | 0 | -10.027423 | -0.725560 | 1.147357  |
| 124 | 6 | 0 | -8.797066  | -1.428558 | 1.245504  |
| 125 | 6 | 0 | -7.562309  | -0.702097 | 1.379602  |
| 126 | 6 | 0 | -7.562111  | 0.701123  | 1.379494  |
| 127 | 6 | 0 | -8.796639  | 1.427955  | 1.245287  |
| 128 | 6 | 0 | -10.027213 | 0.725337  | 1.147265  |

|     |   |   |            |           |           |
|-----|---|---|------------|-----------|-----------|
| 129 | 6 | 0 | -11.215522 | -1.492124 | 1.020862  |
| 130 | 6 | 0 | -11.192284 | -2.872487 | 0.960875  |
| 131 | 6 | 0 | -9.943573  | -3.569472 | 1.024553  |
| 132 | 6 | 0 | -8.783740  | -2.843971 | 1.182832  |
| 133 | 6 | 0 | -8.782851  | 2.843350  | 1.182493  |
| 134 | 6 | 0 | -9.942420  | 3.569211  | 1.024028  |
| 135 | 6 | 0 | -11.191353 | 2.872621  | 0.960370  |
| 136 | 6 | 0 | -11.215064 | 1.492276  | 1.020678  |
| 137 | 8 | 0 | -12.284267 | -3.668472 | 0.810101  |
| 138 | 8 | 0 | -10.020913 | -4.914578 | 0.889866  |
| 139 | 6 | 0 | -8.795569  | -5.645680 | 0.832499  |
| 140 | 6 | 0 | -13.558982 | -3.051041 | 0.742367  |
| 141 | 8 | 0 | -12.283065 | 3.668933  | 0.809386  |
| 142 | 8 | 0 | -10.019282 | 4.914341  | 0.889335  |
| 143 | 6 | 0 | -8.793725  | 5.645108  | 0.832976  |
| 144 | 6 | 0 | -13.557988 | 3.051914  | 0.741743  |
| 145 | 6 | 0 | -6.324770  | -1.374562 | 1.481953  |
| 146 | 6 | 0 | -6.324464  | 1.373378  | 1.481749  |
| 147 | 6 | 0 | -5.171926  | -1.782461 | 1.553629  |
| 148 | 6 | 0 | -3.864264  | -2.105475 | 1.612488  |
| 149 | 6 | 0 | -2.637244  | -2.210377 | 1.651452  |
| 150 | 6 | 0 | -5.171711  | 1.781523  | 1.553380  |
| 151 | 6 | 0 | -3.864080  | 2.104636  | 1.612207  |
| 152 | 6 | 0 | -2.637081  | 2.209775  | 1.651024  |
| 153 | 1 | 0 | 8.258382   | 0.976988  | 2.112715  |
| 154 | 1 | 0 | 3.942261   | 3.339922  | 1.580255  |
| 155 | 1 | 0 | 3.942163   | -3.340292 | 1.578893  |
| 156 | 1 | 0 | 8.258337   | -0.977696 | 2.112568  |
| 157 | 1 | 0 | 5.300841   | 6.638249  | 1.015200  |
| 158 | 1 | 0 | 4.515512   | 5.200452  | 0.291029  |
| 159 | 1 | 0 | 4.269792   | 5.582756  | 2.021945  |
| 160 | 1 | 0 | 10.403529  | 3.840139  | 2.138832  |
| 161 | 1 | 0 | 9.911366   | 2.268786  | 1.466457  |
| 162 | 1 | 0 | 9.675111   | 2.600341  | 3.213163  |
| 163 | 1 | 0 | 5.300847   | -6.638217 | 1.011457  |
| 164 | 1 | 0 | 4.515717   | -5.199884 | 0.288094  |
| 165 | 1 | 0 | 4.269578   | -5.583413 | 2.018677  |
| 166 | 1 | 0 | 10.403372  | -3.840953 | 2.137629  |
| 167 | 1 | 0 | 9.674873   | -2.601684 | 3.212507  |
| 168 | 1 | 0 | 9.911332   | -2.269227 | 1.466012  |
| 169 | 1 | 0 | -12.168807 | -0.986290 | 0.956288  |
| 170 | 1 | 0 | -7.825692  | -3.346253 | 1.218678  |
| 171 | 1 | 0 | -7.824643  | 3.345320  | 1.218341  |
| 172 | 1 | 0 | -12.168534 | 0.986757  | 0.956359  |
| 173 | 1 | 0 | -9.087092  | -6.688273 | 0.693087  |
| 174 | 1 | 0 | -8.176523  | -5.315096 | -0.008674 |
| 175 | 1 | 0 | -8.234281  | -5.549766 | 1.771761  |
| 176 | 1 | 0 | -14.278855 | -3.864323 | 0.635201  |
| 177 | 1 | 0 | -13.782154 | -2.484596 | 1.656969  |
| 178 | 1 | 0 | -13.636980 | -2.379476 | -0.124411 |
| 179 | 1 | 0 | -9.084840  | 6.687766  | 0.693083  |
| 180 | 1 | 0 | -8.173889  | 5.314343  | -0.007541 |
| 181 | 1 | 0 | -8.233387  | 5.549255  | 1.772808  |
| 182 | 1 | 0 | -14.277576 | 3.865414  | 0.634315  |
| 183 | 1 | 0 | -13.636153 | 2.380141  | -0.124859 |
| 184 | 1 | 0 | -13.781407 | 2.485794  | 1.656484  |

No imaginary frequency.

Total energy = -5204.52520490 hartree.

**Table S15.** Cartesian Coordinates of  $3'_2$  at the B3LYP-D3/6-31G(d) level

| Center Number | Atomic Number | Atomic Type | Coordinates (Angstroms) |           |          |
|---------------|---------------|-------------|-------------------------|-----------|----------|
|               |               |             | X                       | Y         | Z        |
| 1             | 6             | 0           | -10.035636              | 0.701740  | 1.419548 |
| 2             | 6             | 0           | -10.035599              | -0.701737 | 1.419597 |

|    |   |   |            |           |          |
|----|---|---|------------|-----------|----------|
| 3  | 6 | 0 | -11.271290 | -1.429728 | 1.293241 |
| 4  | 6 | 0 | -12.501558 | -0.725756 | 1.203503 |
| 5  | 6 | 0 | -12.501594 | 0.725619  | 1.203472 |
| 6  | 6 | 0 | -11.271359 | 1.429650  | 1.293162 |
| 7  | 6 | 0 | -13.690793 | 1.491188  | 1.084108 |
| 8  | 6 | 0 | -13.668831 | 2.871681  | 1.022694 |
| 9  | 6 | 0 | -12.420075 | 3.569636  | 1.077780 |
| 10 | 6 | 0 | -11.258832 | 2.844758  | 1.229432 |
| 11 | 6 | 0 | -11.258696 | -2.844836 | 1.229549 |
| 12 | 6 | 0 | -12.419914 | -3.569773 | 1.077959 |
| 13 | 6 | 0 | -13.668704 | -2.871874 | 1.022860 |
| 14 | 6 | 0 | -13.690725 | -1.491380 | 1.084171 |
| 15 | 6 | 0 | -8.801325  | 1.375823  | 1.512218 |
| 16 | 6 | 0 | -7.667341  | 1.837772  | 1.572489 |
| 17 | 6 | 0 | -6.388635  | 2.252435  | 1.616060 |
| 18 | 6 | 0 | -5.180834  | 2.504350  | 1.640960 |
| 19 | 6 | 0 | -3.856363  | 2.694264  | 1.673247 |
| 20 | 6 | 0 | -2.622307  | 2.758188  | 1.702496 |
| 21 | 6 | 0 | -1.285999  | 2.748313  | 1.728882 |
| 22 | 6 | 0 | -0.053523  | 2.655469  | 1.745007 |
| 23 | 6 | 0 | 1.270391   | 2.461772  | 1.751533 |
| 24 | 6 | 0 | 2.478507   | 2.211485  | 1.750201 |
| 25 | 6 | 0 | 3.763851   | 1.815830  | 1.748725 |
| 26 | 6 | 0 | 4.907867   | 1.373257  | 1.750709 |
| 27 | 6 | 0 | 6.148155   | -0.702975 | 1.778374 |
| 28 | 6 | 0 | 6.148259   | 0.702664  | 1.778548 |
| 29 | 6 | 0 | 7.390199   | 1.427752  | 1.808971 |
| 30 | 6 | 0 | 8.618034   | 0.724395  | 1.923645 |
| 31 | 6 | 0 | 8.617930   | -0.725137 | 1.923408 |
| 32 | 6 | 0 | 7.389982   | -1.428270 | 1.808564 |
| 33 | 6 | 0 | 9.812740   | -1.484486 | 1.978380 |
| 34 | 6 | 0 | 9.810097   | -2.859983 | 1.862446 |
| 35 | 6 | 0 | 8.573239   | -3.551696 | 1.673304 |
| 36 | 6 | 0 | 7.395127   | -2.839988 | 1.686310 |
| 37 | 6 | 0 | 7.395572   | 2.839503  | 1.687167 |
| 38 | 6 | 0 | 8.573793   | 3.551047  | 1.674460 |
| 39 | 6 | 0 | 9.810544   | 2.859082  | 1.863317 |
| 40 | 6 | 0 | 9.812951   | 1.483552  | 1.978907 |
| 41 | 6 | 0 | -8.801275  | -1.375790 | 1.512282 |
| 42 | 6 | 0 | -7.667348  | -1.837878 | 1.572570 |
| 43 | 6 | 0 | -6.388670  | -2.252647 | 1.616168 |
| 44 | 6 | 0 | -5.180909  | -2.504759 | 1.641093 |
| 45 | 6 | 0 | -3.856448  | -2.694812 | 1.673204 |
| 46 | 6 | 0 | -2.622395  | -2.758829 | 1.702416 |
| 47 | 6 | 0 | -1.286084  | -2.749052 | 1.728693 |
| 48 | 6 | 0 | -0.053617  | -2.656085 | 1.744810 |
| 49 | 6 | 0 | 1.270268   | -2.462210 | 1.751293 |
| 50 | 6 | 0 | 2.478349   | -2.211752 | 1.749978 |
| 51 | 6 | 0 | 3.763657   | -1.815977 | 1.748474 |
| 52 | 6 | 0 | 4.907669   | -1.373394 | 1.750452 |
| 53 | 8 | 0 | 10.915471  | 3.648466  | 1.886015 |
| 54 | 6 | 0 | 12.172087  | 3.038037  | 2.154440 |
| 55 | 8 | 0 | 8.680391   | 4.894068  | 1.478940 |
| 56 | 6 | 0 | 7.490650   | 5.605361  | 1.155342 |
| 57 | 8 | 0 | 10.914862  | -3.649563 | 1.884841 |
| 58 | 6 | 0 | 12.171537  | -3.039555 | 2.153993 |
| 59 | 8 | 0 | 8.679663   | -4.894647 | 1.477212 |
| 60 | 6 | 0 | 7.489858   | -5.605595 | 1.153055 |
| 61 | 8 | 0 | -12.499331 | 4.913859  | 0.943073 |
| 62 | 6 | 0 | -11.275499 | 5.647801  | 0.882683 |
| 63 | 8 | 0 | -14.761461 | 3.666488  | 0.878358 |
| 64 | 6 | 0 | -16.037325 | 3.049424  | 0.820944 |
| 65 | 8 | 0 | -14.761298 | -3.666741 | 0.878607 |
| 66 | 6 | 0 | -16.037187 | -3.049737 | 0.821138 |
| 67 | 8 | 0 | -12.499124 | -4.914002 | 0.943290 |
| 68 | 6 | 0 | -11.275264 | -5.647869 | 0.882415 |
| 69 | 1 | 0 | -14.644284 | 0.985067  | 1.026375 |
| 70 | 1 | 0 | -10.301471 | 3.348521  | 1.259072 |
| 71 | 1 | 0 | -10.301312 | -3.348553 | 1.259173 |

|     |   |   |            |           |           |
|-----|---|---|------------|-----------|-----------|
| 72  | 1 | 0 | -14.644234 | -0.985303 | 1.026353  |
| 73  | 1 | 0 | 10.761976  | -0.977752 | 2.073578  |
| 74  | 1 | 0 | 6.444868   | -3.342070 | 1.557922  |
| 75  | 1 | 0 | 6.445390   | 3.341783  | 1.558972  |
| 76  | 1 | 0 | 10.762070  | 0.976646  | 2.074318  |
| 77  | 1 | 0 | 12.186846  | 2.601141  | 3.161993  |
| 78  | 1 | 0 | 12.412643  | 2.267413  | 1.414159  |
| 79  | 1 | 0 | 12.908558  | 3.839705  | 2.081933  |
| 80  | 1 | 0 | 7.801606   | 6.634729  | 0.969052  |
| 81  | 1 | 0 | 7.012977   | 5.192451  | 0.257043  |
| 82  | 1 | 0 | 6.773890   | 5.586596  | 1.986474  |
| 83  | 1 | 0 | 12.185942  | -2.602935 | 3.161673  |
| 84  | 1 | 0 | 12.907816  | -3.841402 | 2.081589  |
| 85  | 1 | 0 | 12.412604  | -2.268771 | 1.414058  |
| 86  | 1 | 0 | 7.012349   | -5.192098 | 0.254940  |
| 87  | 1 | 0 | 6.773008   | -5.587206 | 1.984117  |
| 88  | 1 | 0 | 7.800693   | -6.634899 | 0.966207  |
| 89  | 1 | 0 | -11.569792 | 6.689781  | 0.745197  |
| 90  | 1 | 0 | -10.658421 | 5.319516  | 0.039202  |
| 91  | 1 | 0 | -10.711528 | 5.551980  | 1.820254  |
| 92  | 1 | 0 | -16.757317 | 3.863058  | 0.718195  |
| 93  | 1 | 0 | -16.121854 | 2.377078  | -0.044510 |
| 94  | 1 | 0 | -16.253548 | 2.484477  | 1.738022  |
| 95  | 1 | 0 | -16.757146 | -3.863412 | 0.718475  |
| 96  | 1 | 0 | -16.253429 | -2.484707 | 1.738161  |
| 97  | 1 | 0 | -16.121748 | -2.377482 | -0.044384 |
| 98  | 1 | 0 | -11.569535 | -6.689850 | 0.744889  |
| 99  | 1 | 0 | -10.658534 | -5.319399 | 0.038755  |
| 100 | 1 | 0 | -10.710975 | -5.552136 | 1.819804  |
| 101 | 6 | 0 | -6.148325  | 0.703147  | -1.777856 |
| 102 | 6 | 0 | -6.148201  | -0.702497 | -1.777796 |
| 103 | 6 | 0 | -7.390010  | -1.427803 | -1.808299 |
| 104 | 6 | 0 | -8.617932  | -0.724664 | -1.923409 |
| 105 | 6 | 0 | -8.618061  | 0.724868  | -1.923437 |
| 106 | 6 | 0 | -7.390259  | 1.428230  | -1.808414 |
| 107 | 6 | 0 | -9.812992  | 1.484006  | -1.978810 |
| 108 | 6 | 0 | -9.810599  | 2.859519  | -1.863095 |
| 109 | 6 | 0 | -8.573893  | 3.551482  | -1.673920 |
| 110 | 6 | 0 | -7.395655  | 2.839978  | -1.686422 |
| 111 | 6 | 0 | -7.395162  | -2.839539 | -1.686192 |
| 112 | 6 | 0 | -8.573277  | -3.551243 | -1.673638 |
| 113 | 6 | 0 | -9.810090  | -2.859523 | -1.862996 |
| 114 | 6 | 0 | -9.812726  | -1.484021 | -1.978815 |
| 115 | 6 | 0 | -4.907940  | 1.373765  | -1.749828 |
| 116 | 6 | 0 | -3.763917  | 1.816321  | -1.747753 |
| 117 | 6 | 0 | -2.478575  | 2.211976  | -1.749182 |
| 118 | 6 | 0 | -1.270470  | 2.462324  | -1.750479 |
| 119 | 6 | 0 | 0.053427   | 2.656108  | -1.743796 |
| 120 | 6 | 0 | 1.285899   | 2.748986  | -1.727592 |
| 121 | 6 | 0 | 2.622208   | 2.758776  | -1.701169 |
| 122 | 6 | 0 | 3.856254   | 2.694718  | -1.671929 |
| 123 | 6 | 0 | 5.180715   | 2.504674  | -1.639831 |
| 124 | 6 | 0 | 6.388485   | 2.252601  | -1.615096 |
| 125 | 6 | 0 | 7.667176   | 1.837863  | -1.571745 |
| 126 | 6 | 0 | 8.801154   | 1.375870  | -1.511711 |
| 127 | 6 | 0 | 10.035641  | -0.701610 | -1.419502 |
| 128 | 6 | 0 | 10.035533  | 0.701868  | -1.419366 |
| 129 | 6 | 0 | 11.271230  | 1.429914  | -1.293398 |
| 130 | 6 | 0 | 12.501579  | 0.725999  | -1.204347 |
| 131 | 6 | 0 | 12.501674  | -0.725377 | -1.204330 |
| 132 | 6 | 0 | 11.271446  | -1.429471 | -1.293587 |
| 133 | 6 | 0 | 13.690960  | -1.490892 | -1.085436 |
| 134 | 6 | 0 | 13.669095  | -2.871384 | -1.024147 |
| 135 | 6 | 0 | 12.420349  | -3.569411 | -1.078743 |
| 136 | 6 | 0 | 11.259001  | -2.844583 | -1.229847 |
| 137 | 6 | 0 | 11.258598  | 2.845013  | -1.229550 |
| 138 | 6 | 0 | 12.419865  | 3.570008  | -1.078584 |
| 139 | 6 | 0 | 13.668725  | 2.872173  | -1.024308 |
| 140 | 6 | 0 | 13.690777  | 1.491684  | -1.085699 |

|     |   |   |            |           |           |
|-----|---|---|------------|-----------|-----------|
| 141 | 6 | 0 | -4.907713  | -1.372903 | -1.749686 |
| 142 | 6 | 0 | -3.763686  | -1.815442 | -1.747569 |
| 143 | 6 | 0 | -2.478363  | -2.211185 | -1.748948 |
| 144 | 6 | 0 | -1.270283  | -2.461642 | -1.750206 |
| 145 | 6 | 0 | 0.053601   | -2.655526 | -1.743741 |
| 146 | 6 | 0 | 1.286063   | -2.748552 | -1.727696 |
| 147 | 6 | 0 | 2.622373   | -2.758480 | -1.701387 |
| 148 | 6 | 0 | 3.856427   | -2.694506 | -1.672266 |
| 149 | 6 | 0 | 5.180901   | -2.504521 | -1.640211 |
| 150 | 6 | 0 | 6.388687   | -2.252511 | -1.615496 |
| 151 | 6 | 0 | 7.667377   | -1.837762 | -1.572093 |
| 152 | 6 | 0 | 8.801344   | -1.375750 | -1.511980 |
| 153 | 8 | 0 | 14.761372  | 3.667086  | -0.880724 |
| 154 | 6 | 0 | 16.037339  | 3.050153  | -0.824208 |
| 155 | 8 | 0 | 12.499055  | 4.914241  | -0.943944 |
| 156 | 6 | 0 | 11.275082  | 5.647769  | -0.880636 |
| 157 | 8 | 0 | 14.761821  | -3.666151 | -0.880315 |
| 158 | 6 | 0 | 16.037676  | -3.049030 | -0.823364 |
| 159 | 8 | 0 | 12.499746  | -4.913614 | -0.943967 |
| 160 | 6 | 0 | 11.275917  | -5.647513 | -0.882144 |
| 161 | 8 | 0 | -8.680671  | 4.894483  | -1.478324 |
| 162 | 6 | 0 | -7.491080  | 5.605845  | -1.154282 |
| 163 | 8 | 0 | -10.915482 | 3.648926  | -1.885682 |
| 164 | 6 | 0 | -12.171920 | 3.038728  | -2.155411 |
| 165 | 8 | 0 | -10.914833 | -3.649131 | -1.885628 |
| 166 | 6 | 0 | -12.171377 | -3.039133 | -2.155328 |
| 167 | 8 | 0 | -8.679830  | -4.894222 | -1.477784 |
| 168 | 6 | 0 | -7.490134  | -5.605276 | -1.153438 |
| 169 | 1 | 0 | -10.762119 | 0.977110  | -2.074182 |
| 170 | 1 | 0 | -6.445500  | 3.342235  | -1.557933 |
| 171 | 1 | 0 | -6.444931  | -3.341615 | -1.557570 |
| 172 | 1 | 0 | -10.761930 | -0.977300 | -2.074355 |
| 173 | 1 | 0 | 14.644434  | -0.984722 | -1.027861 |
| 174 | 1 | 0 | 10.301635  | -3.348363 | -1.259016 |
| 175 | 1 | 0 | 10.301170  | 3.348680  | -1.258675 |
| 176 | 1 | 0 | 14.644354  | 0.985653  | -1.028625 |
| 177 | 1 | 0 | 16.122545  | 2.377813  | 0.041184  |
| 178 | 1 | 0 | 16.252975  | 2.485234  | -1.741441 |
| 179 | 1 | 0 | 16.757319  | 3.863861  | -0.721961 |
| 180 | 1 | 0 | 11.569313  | 6.689741  | -0.742954 |
| 181 | 1 | 0 | 10.709265  | 5.552489  | -1.817146 |
| 182 | 1 | 0 | 10.659946  | 5.318530  | -0.036125 |
| 183 | 1 | 0 | 16.122555  | -2.376823 | 0.042163  |
| 184 | 1 | 0 | 16.757758  | -3.862642 | -0.721062 |
| 185 | 1 | 0 | 16.253465  | -2.483923 | -1.740446 |
| 186 | 1 | 0 | 10.710790  | -5.551656 | -1.819002 |
| 187 | 1 | 0 | 10.660026  | -5.319108 | -0.037851 |
| 188 | 1 | 0 | 11.570343  | -6.689504 | -0.745035 |
| 189 | 1 | 0 | -7.802135  | 6.635236  | -0.968289 |
| 190 | 1 | 0 | -6.773941  | 5.586983  | -1.985084 |
| 191 | 1 | 0 | -7.013810  | 5.193056  | -0.255715 |
| 192 | 1 | 0 | -12.908374 | 3.840445  | -2.083300 |
| 193 | 1 | 0 | -12.185831 | 2.602116  | -3.163100 |
| 194 | 1 | 0 | -12.413211 | 2.267891  | -1.415591 |
| 195 | 1 | 0 | -12.907675 | -3.841013 | -2.083423 |
| 196 | 1 | 0 | -12.412851 | -2.268475 | -1.415380 |
| 197 | 1 | 0 | -12.185322 | -2.602347 | -3.162942 |
| 198 | 1 | 0 | -7.800997  | -6.634707 | -0.967341 |
| 199 | 1 | 0 | -6.772867  | -5.586406 | -1.984129 |
| 200 | 1 | 0 | -7.013097  | -5.192219 | -0.254869 |

-----  
No imaginary frequency.

Total energy = -5813.83683312 hartree.

**Table S16.** Cartesian Coordinates of  $4'_2$  at the B3LYP-D3/6-31G(d) level

-----  
Center      Atomic      Atomic      Coordinates (Angstroms)

| Number | Number | Type | X          | Y         | Z        |
|--------|--------|------|------------|-----------|----------|
| 1      | 6      | 0    | -12.498534 | -0.702152 | 1.448369 |
| 2      | 6      | 0    | -12.498534 | 0.701453  | 1.448583 |
| 3      | 6      | 0    | -13.734618 | 1.430038  | 1.325272 |
| 4      | 6      | 0    | -14.964815 | 0.725424  | 1.239634 |
| 5      | 6      | 0    | -14.964808 | -0.726044 | 1.239337 |
| 6      | 6      | 0    | -13.734612 | -1.430677 | 1.324776 |
| 7      | 6      | 0    | -16.154561 | -1.490958 | 1.122804 |
| 8      | 6      | 0    | -16.133379 | -2.871439 | 1.059580 |
| 9      | 6      | 0    | -14.884544 | -3.570001 | 1.109693 |
| 10     | 6      | 0    | -13.722638 | -2.845648 | 1.258986 |
| 11     | 6      | 0    | -13.722674 | 2.845034  | 1.260029 |
| 12     | 6      | 0    | -14.884607 | 3.569414  | 1.111107 |
| 13     | 6      | 0    | -16.133445 | 2.870859  | 1.060841 |
| 14     | 6      | 0    | -16.154600 | 1.490354  | 1.123513 |
| 15     | 6      | 0    | -11.266525 | -1.378684 | 1.536128 |
| 16     | 6      | 0    | -11.266545 | 1.378003  | 1.536452 |
| 17     | 6      | 0    | -10.146763 | -1.875920 | 1.588782 |
| 18     | 6      | 0    | -8.888696  | -2.346435 | 1.620779 |
| 19     | 6      | 0    | -7.702911  | -2.690776 | 1.633749 |
| 20     | 6      | 0    | -6.398770  | -2.983441 | 1.654968 |
| 21     | 6      | 0    | -5.178117  | -3.183860 | 1.679718 |
| 22     | 6      | 0    | -3.850821  | -3.317848 | 1.706489 |
| 23     | 6      | 0    | -2.614254  | -3.375453 | 1.730041 |
| 24     | 6      | 0    | -1.280794  | -3.364072 | 1.748339 |
| 25     | 6      | 0    | -0.045336  | -3.282762 | 1.756928 |
| 26     | 6      | 0    | 1.280315   | -3.132438 | 1.758427 |
| 27     | 6      | 0    | 2.499515   | -2.921815 | 1.750357 |
| 28     | 6      | 0    | 3.803751   | -2.630802 | 1.737540 |
| 29     | 6      | 0    | 4.992913   | -2.299292 | 1.722965 |
| 30     | 6      | 0    | 6.259626   | -1.851553 | 1.715870 |
| 31     | 6      | 0    | 7.390843   | -1.375982 | 1.718142 |
| 32     | 6      | 0    | 8.628426   | -0.702969 | 1.749819 |
| 33     | 6      | 0    | -10.146823 | 1.875333  | 1.589091 |
| 34     | 6      | 0    | -8.888764  | 2.345882  | 1.621008 |
| 35     | 6      | 0    | -7.703001  | 2.690307  | 1.633861 |
| 36     | 6      | 0    | -6.398895  | 2.983133  | 1.655168 |
| 37     | 6      | 0    | -5.178263  | 3.183676  | 1.679952 |
| 38     | 6      | 0    | -3.850972  | 3.317725  | 1.706768 |
| 39     | 6      | 0    | -2.614408  | 3.375383  | 1.730263 |
| 40     | 6      | 0    | -1.280944  | 3.363964  | 1.748351 |
| 41     | 6      | 0    | -0.045487  | 3.282610  | 1.756754 |
| 42     | 6      | 0    | 1.280156   | 3.132217  | 1.758080 |
| 43     | 6      | 0    | 2.499346   | 2.921538  | 1.749919 |
| 44     | 6      | 0    | 3.803589   | 2.630567  | 1.737137 |
| 45     | 6      | 0    | 4.992746   | 2.299038  | 1.722550 |
| 46     | 6      | 0    | 6.259459   | 1.851311  | 1.715415 |
| 47     | 6      | 0    | 7.390694   | 1.375779  | 1.717721 |
| 48     | 6      | 0    | 9.870524   | -1.428608 | 1.784716 |
| 49     | 6      | 0    | 11.098154  | -0.724798 | 1.898682 |
| 50     | 6      | 0    | 11.098080  | 0.725010  | 1.898447 |
| 51     | 6      | 0    | 9.870398   | 1.428683  | 1.784331 |
| 52     | 6      | 0    | 8.628369   | 0.702945  | 1.749606 |
| 53     | 6      | 0    | 9.875929   | -2.840586 | 1.666971 |
| 54     | 6      | 0    | 11.054117  | -3.552168 | 1.654011 |
| 55     | 6      | 0    | 12.291086  | -2.859443 | 1.839509 |
| 56     | 6      | 0    | 12.293197  | -1.483638 | 1.953774 |
| 57     | 6      | 0    | 12.293056  | 1.483976  | 1.953284 |
| 58     | 6      | 0    | 12.290806  | 2.859740  | 1.838687 |
| 59     | 6      | 0    | 11.053787  | 3.552310  | 1.652870 |
| 60     | 6      | 0    | 9.875664   | 2.840631  | 1.666110 |
| 61     | 8      | 0    | -14.964888 | -4.913471 | 0.973380 |
| 62     | 6      | 0    | -13.741916 | -5.648936 | 0.909502 |
| 63     | 8      | 0    | -17.226158 | -3.665423 | 0.917850 |
| 64     | 6      | 0    | -18.502714 | -3.048575 | 0.865663 |
| 65     | 8      | 0    | -17.226243 | 3.664893  | 0.919562 |
| 66     | 6      | 0    | -18.502804 | 3.048063  | 0.867329 |
| 67     | 8      | 0    | -14.964991 | 4.912930  | 0.975329 |



|     |   |   |            |           |           |
|-----|---|---|------------|-----------|-----------|
| 68  | 6 | 0 | -13.742044 | 5.648463  | 0.911607  |
| 69  | 8 | 0 | 11.160356  | -4.895035 | 1.460958  |
| 70  | 6 | 0 | 9.969932   | -5.607829 | 1.140990  |
| 71  | 8 | 0 | 13.395868  | -3.648201 | 1.860240  |
| 72  | 6 | 0 | 14.653433  | -3.037774 | 2.125209  |
| 73  | 8 | 0 | 13.395522  | 3.648598  | 1.859311  |
| 74  | 6 | 0 | 14.653129  | 3.038294  | 2.124390  |
| 75  | 8 | 0 | 11.159942  | 4.895058  | 1.458972  |
| 76  | 6 | 0 | 9.969311   | 5.607680  | 1.139439  |
| 77  | 1 | 0 | -17.108084 | -0.984602 | 1.068676  |
| 78  | 1 | 0 | -12.765780 | -3.350391 | 1.285092  |
| 79  | 1 | 0 | -12.765834 | 3.349805  | 1.286279  |
| 80  | 1 | 0 | -17.108120 | 0.984004  | 1.069292  |
| 81  | 1 | 0 | 8.926116   | -3.343845 | 1.540961  |
| 82  | 1 | 0 | 13.242317  | -0.976551 | 2.048039  |
| 83  | 1 | 0 | 13.242234  | 0.976987  | 2.047510  |
| 84  | 1 | 0 | 8.925798   | 3.343715  | 1.539798  |
| 85  | 1 | 0 | -13.175395 | -5.553811 | 1.845538  |
| 86  | 1 | 0 | -13.127146 | -5.321219 | 0.064134  |
| 87  | 1 | 0 | -14.037913 | -6.690462 | 0.772740  |
| 88  | 1 | 0 | -19.222573 | -3.862417 | 0.764296  |
| 89  | 1 | 0 | -18.715676 | -2.485156 | 1.784353  |
| 90  | 1 | 0 | -18.590177 | -2.375271 | 0.001334  |
| 91  | 1 | 0 | -19.222683 | 3.861944  | 0.766423  |
| 92  | 1 | 0 | -18.590414 | 2.375123  | 0.002732  |
| 93  | 1 | 0 | -18.715614 | 2.484258  | 1.785817  |
| 94  | 1 | 0 | -14.038098 | 6.690036  | 0.775335  |
| 95  | 1 | 0 | -13.175398 | 5.552935  | 1.847522  |
| 96  | 1 | 0 | -13.127383 | 5.321135  | 0.066006  |
| 97  | 1 | 0 | 10.281297  | -6.637270 | 0.956232  |
| 98  | 1 | 0 | 9.255183   | -5.587787 | 1.973717  |
| 99  | 1 | 0 | 9.490485   | -5.196804 | 0.242852  |
| 100 | 1 | 0 | 15.389379  | -3.839787 | 2.051834  |
| 101 | 1 | 0 | 14.892201  | -2.267968 | 1.383473  |
| 102 | 1 | 0 | 14.670576  | -2.599980 | 3.132249  |
| 103 | 1 | 0 | 15.388963  | 3.840444  | 2.051384  |
| 104 | 1 | 0 | 14.670115  | 2.600240  | 3.131319  |
| 105 | 1 | 0 | 14.892158  | 2.268733  | 1.382484  |
| 106 | 1 | 0 | 9.489375   | 5.196339  | 0.241704  |
| 107 | 1 | 0 | 9.255034   | 5.587858  | 1.972577  |
| 108 | 1 | 0 | 10.280505  | 6.637074  | 0.954134  |
| 109 | 6 | 0 | -8.628666  | -0.702661 | -1.749072 |
| 110 | 6 | 0 | -8.628660  | 0.703256  | -1.748899 |
| 111 | 6 | 0 | -9.870721  | 1.428967  | -1.783779 |
| 112 | 6 | 0 | -11.098337 | 0.725233  | -1.898326 |
| 113 | 6 | 0 | -11.098334 | -0.724595 | -1.898593 |
| 114 | 6 | 0 | -9.870720  | -1.428359 | -1.784233 |
| 115 | 6 | 0 | -12.293324 | -1.483464 | -1.954097 |
| 116 | 6 | 0 | -12.291232 | -2.859258 | -1.839743 |
| 117 | 6 | 0 | -11.054318 | -3.551919 | -1.653616 |
| 118 | 6 | 0 | -9.876130  | -2.840329 | -1.666289 |
| 119 | 6 | 0 | -9.876139  | 2.840885  | -1.665332 |
| 120 | 6 | 0 | -11.054337 | 3.552461  | -1.652337 |
| 121 | 6 | 0 | -12.291252 | 2.859865  | -1.838621 |
| 122 | 6 | 0 | -12.293337 | 1.484109  | -1.953470 |
| 123 | 6 | 0 | -7.391026  | -1.375564 | -1.717109 |
| 124 | 6 | 0 | -7.391035  | 1.376157  | -1.716887 |
| 125 | 6 | 0 | -6.259767  | -1.851051 | -1.714706 |
| 126 | 6 | 0 | -4.992998  | -2.298642 | -1.721759 |
| 127 | 6 | 0 | -3.803797  | -2.630042 | -1.736295 |
| 128 | 6 | 0 | -2.499516  | -2.920860 | -1.749117 |
| 129 | 6 | 0 | -1.280299  | -3.131426 | -1.757190 |
| 130 | 6 | 0 | 0.045353   | -3.281758 | -1.755716 |
| 131 | 6 | 0 | 1.280815   | -3.363115 | -1.747115 |
| 132 | 6 | 0 | 2.614279   | -3.374644 | -1.728823 |
| 133 | 6 | 0 | 3.850854   | -3.317127 | -1.705256 |
| 134 | 6 | 0 | 5.178179   | -3.183334 | -1.678515 |
| 135 | 6 | 0 | 6.398856   | -2.983030 | -1.653862 |
| 136 | 6 | 0 | 7.703050   | -2.690537 | -1.632829 |

|     |   |   |            |           |           |
|-----|---|---|------------|-----------|-----------|
| 137 | 6 | 0 | 8.888872   | -2.346311 | -1.620074 |
| 138 | 6 | 0 | 10.146961  | -1.875820 | -1.588186 |
| 139 | 6 | 0 | 11.266744  | -1.378607 | -1.535687 |
| 140 | 6 | 0 | 12.498732  | -0.701965 | -1.448357 |
| 141 | 6 | 0 | -6.259819  | 1.851734  | -1.714502 |
| 142 | 6 | 0 | -4.993063  | 2.299354  | -1.721625 |
| 143 | 6 | 0 | -3.803854  | 2.630705  | -1.736256 |
| 144 | 6 | 0 | -2.499575  | 2.921528  | -1.748963 |
| 145 | 6 | 0 | -1.280353  | 3.132040  | -1.756994 |
| 146 | 6 | 0 | 0.045308   | 3.282282  | -1.755529 |
| 147 | 6 | 0 | 1.280774   | 3.363524  | -1.747023 |
| 148 | 6 | 0 | 2.614240   | 3.374914  | -1.728900 |
| 149 | 6 | 0 | 3.850807   | 3.317238  | -1.705519 |
| 150 | 6 | 0 | 5.178108   | 3.183217  | -1.678903 |
| 151 | 6 | 0 | 6.398750   | 2.982704  | -1.654332 |
| 152 | 6 | 0 | 7.702885   | 2.689978  | -1.633227 |
| 153 | 6 | 0 | 8.888672   | 2.345635  | -1.620428 |
| 154 | 6 | 0 | 10.146779  | 1.875209  | -1.588559 |
| 155 | 6 | 0 | 11.266603  | 1.378096  | -1.536053 |
| 156 | 6 | 0 | 13.734900  | -1.430466 | -1.325299 |
| 157 | 6 | 0 | 14.965099  | -0.725767 | -1.240365 |
| 158 | 6 | 0 | 14.965049  | 0.725698  | -1.240689 |
| 159 | 6 | 0 | 13.734788  | 1.430269  | -1.325772 |
| 160 | 6 | 0 | 12.498680  | 0.701644  | -1.448555 |
| 161 | 6 | 0 | 13.723083  | -2.845453 | -1.259665 |
| 162 | 6 | 0 | 14.885153  | -3.569703 | -1.111070 |
| 163 | 6 | 0 | 16.133952  | -2.871058 | -1.061372 |
| 164 | 6 | 0 | 16.154976  | -1.490573 | -1.124390 |
| 165 | 6 | 0 | 16.154863  | 1.490671  | -1.125210 |
| 166 | 6 | 0 | 16.133706  | 2.871174  | -1.062589 |
| 167 | 6 | 0 | 14.884835  | 3.569696  | -1.112212 |
| 168 | 6 | 0 | 13.722834  | 2.845274  | -1.260495 |
| 169 | 8 | 0 | -11.160680 | -4.894701 | -1.460001 |
| 170 | 6 | 0 | -9.970221  | -5.607534 | -1.140316 |
| 171 | 8 | 0 | -13.396010 | -3.648018 | -1.860991 |
| 172 | 6 | 0 | -14.653339 | -3.037623 | -2.127039 |
| 173 | 8 | 0 | -13.396038 | 3.648621  | -1.859486 |
| 174 | 6 | 0 | -14.653365 | 3.038330  | -2.125778 |
| 175 | 8 | 0 | -11.160691 | 4.895172  | -1.458219 |
| 176 | 6 | 0 | -9.970203  | 5.607908  | -1.138410 |
| 177 | 8 | 0 | 14.965718  | -4.913181 | -0.974911 |
| 178 | 6 | 0 | 13.742879  | -5.648819 | -0.911252 |
| 179 | 8 | 0 | 17.226852  | -3.664983 | -0.920250 |
| 180 | 6 | 0 | 18.503380  | -3.048031 | -0.868584 |
| 181 | 8 | 0 | 17.226575  | 3.665237  | -0.921949 |
| 182 | 6 | 0 | 18.503176  | 3.048426  | -0.870440 |
| 183 | 8 | 0 | 14.965271  | 4.913214  | -0.976442 |
| 184 | 6 | 0 | 13.742263  | 5.648555  | -0.910948 |
| 185 | 1 | 0 | -13.242419 | -0.976413 | -2.048769 |
| 186 | 1 | 0 | -8.926352  | -3.343527 | -1.539768 |
| 187 | 1 | 0 | -8.926368  | 3.344062  | -1.538684 |
| 188 | 1 | 0 | -13.242434 | 0.977079  | -2.048232 |
| 189 | 1 | 0 | 12.766266  | -3.350285 | -1.285444 |
| 190 | 1 | 0 | 17.108472  | -0.984138 | -1.070581 |
| 191 | 1 | 0 | 17.108435  | 0.984363  | -1.071537 |
| 192 | 1 | 0 | 12.765953  | 3.349995  | -1.286284 |
| 193 | 1 | 0 | -9.490575  | -5.196578 | -0.242245 |
| 194 | 1 | 0 | -9.255631  | -5.587452 | -1.973177 |
| 195 | 1 | 0 | -10.281560 | -6.636977 | -0.955526 |
| 196 | 1 | 0 | -15.389290 | -3.839725 | -2.054671 |
| 197 | 1 | 0 | -14.892937 | -2.268113 | -1.385262 |
| 198 | 1 | 0 | -14.669503 | -2.599483 | -3.133952 |
| 199 | 1 | 0 | -15.389325 | 3.840392  | -2.053053 |
| 200 | 1 | 0 | -14.669536 | 2.600624  | -3.132879 |
| 201 | 1 | 0 | -14.892950 | 2.268493  | -1.384335 |
| 202 | 1 | 0 | -10.281521 | 6.637312  | -0.953379 |
| 203 | 1 | 0 | -9.490541  | 5.196725  | -0.240452 |
| 204 | 1 | 0 | -9.255643  | 5.588008  | -1.971299 |
| 205 | 1 | 0 | 14.038959  | -6.690354 | -0.774742 |

|     |   |   |           |           |           |
|-----|---|---|-----------|-----------|-----------|
| 206 | 1 | 0 | 13.128108 | -5.321384 | -0.065783 |
| 207 | 1 | 0 | 13.176323 | -5.553469 | -1.847234 |
| 208 | 1 | 0 | 19.223362 | -3.861826 | -0.767719 |
| 209 | 1 | 0 | 18.715839 | -2.484431 | -1.787280 |
| 210 | 1 | 0 | 18.591217 | -2.374877 | -0.004178 |
| 211 | 1 | 0 | 19.223098 | 3.862319  | -0.769934 |
| 212 | 1 | 0 | 18.591290 | 2.375481  | -0.005899 |
| 213 | 1 | 0 | 18.715475 | 2.484634  | -1.789056 |
| 214 | 1 | 0 | 13.174421 | 5.553275  | -1.846147 |
| 215 | 1 | 0 | 13.128840 | 5.320678  | -0.064666 |
| 216 | 1 | 0 | 14.038331 | 6.690115  | -0.774645 |

No imaginary frequency.

Total energy = -6423.14128584 hartree.

**Table S17.** Cartesian Coordinates of Tetramethoxyphenanthrene at the B3LYP/6-31G(d) level

| Center<br>Number | Atomic<br>Number | Atomic<br>Type | Coordinates (Angstroms) |           |           |
|------------------|------------------|----------------|-------------------------|-----------|-----------|
|                  |                  |                | X                       | Y         | Z         |
| 1                | 6                | 0              | -0.681901               | -2.716476 | -0.000060 |
| 2                | 6                | 0              | 0.681900                | -2.716476 | -0.000012 |
| 3                | 6                | 0              | 1.419248                | -1.491305 | 0.000033  |
| 4                | 6                | 0              | 0.725413                | -0.250184 | 0.000027  |
| 5                | 6                | 0              | -0.725414               | -0.250184 | -0.000032 |
| 6                | 6                | 0              | -1.419249               | -1.491305 | -0.000072 |
| 7                | 6                | 0              | -1.497541               | 0.942331  | -0.000055 |
| 8                | 6                | 0              | -2.877621               | 0.918483  | -0.000107 |
| 9                | 6                | 0              | -3.569251               | -0.333809 | -0.000142 |
| 10               | 6                | 0              | -2.838951               | -1.502212 | -0.000127 |
| 11               | 6                | 0              | 2.838950                | -1.502213 | 0.000085  |
| 12               | 6                | 0              | 3.569250                | -0.333810 | 0.000130  |
| 13               | 6                | 0              | 2.877621                | 0.918483  | 0.000127  |
| 14               | 6                | 0              | 1.497541                | 0.942331  | 0.000079  |
| 15               | 8                | 0              | -4.928206               | -0.245797 | -0.000195 |
| 16               | 6                | 0              | -5.665467               | -1.455954 | -0.000178 |
| 17               | 8                | 0              | -3.684014               | 2.016802  | -0.000133 |
| 18               | 6                | 0              | -3.070448               | 3.293006  | -0.000056 |
| 19               | 8                | 0              | 3.684016                | 2.016801  | 0.000182  |
| 20               | 6                | 0              | 3.070453                | 3.293006  | 0.000089  |
| 21               | 8                | 0              | 4.928205                | -0.245798 | 0.000178  |
| 22               | 6                | 0              | 5.665465                | -1.455956 | 0.000211  |
| 23               | 1                | 0              | -0.995371               | 1.900480  | -0.000037 |
| 24               | 1                | 0              | -3.341974               | -2.463117 | -0.000158 |
| 25               | 1                | 0              | 3.341973                | -2.463118 | 0.000086  |
| 26               | 1                | 0              | 0.995371                | 1.900479  | 0.000090  |
| 27               | 1                | 0              | -5.453767               | -2.057282 | 0.894311  |
| 28               | 1                | 0              | -6.717540               | -1.164907 | -0.000180 |
| 29               | 1                | 0              | -5.453772               | -2.057306 | -0.894653 |
| 30               | 1                | 0              | -3.887411               | 4.017031  | -0.000057 |
| 31               | 1                | 0              | -2.451197               | 3.443984  | 0.894764  |
| 32               | 1                | 0              | -2.451131               | 3.444061  | -0.894819 |
| 33               | 1                | 0              | 3.887418                | 4.017029  | 0.000079  |
| 34               | 1                | 0              | 2.451200                | 3.443974  | -0.894733 |
| 35               | 1                | 0              | 2.451137                | 3.444076  | 0.894850  |
| 36               | 1                | 0              | 5.453719                | -2.057300 | 0.894678  |
| 37               | 1                | 0              | 5.453815                | -2.057291 | -0.894286 |
| 38               | 1                | 0              | 6.717538                | -1.164910 | 0.000268  |
| 39               | 1                | 0              | 1.232965                | -3.654237 | -0.000005 |
| 40               | 1                | 0              | -1.232967               | -3.654237 | -0.000092 |

No imaginary frequency.

Total energy = -997.62021079 hartree.

## 4. $^1\text{H}$ and $^{13}\text{C}$ NMR Spectral Data

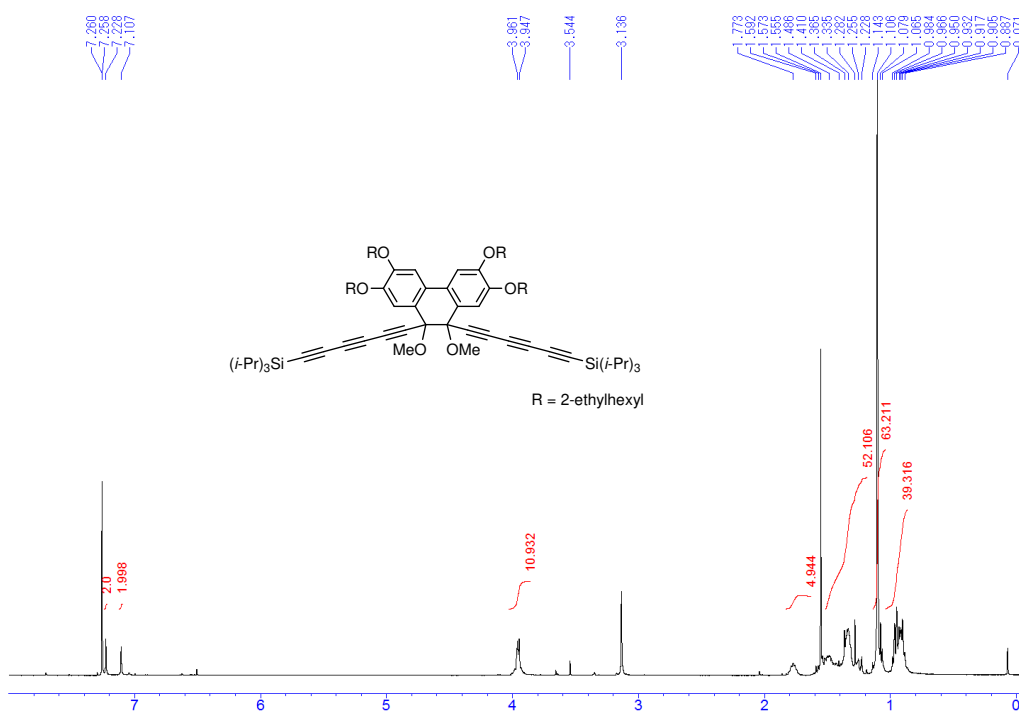

$^1\text{H}$  NMR spectrum of **7** in  $\text{CDCl}_3$  solution.

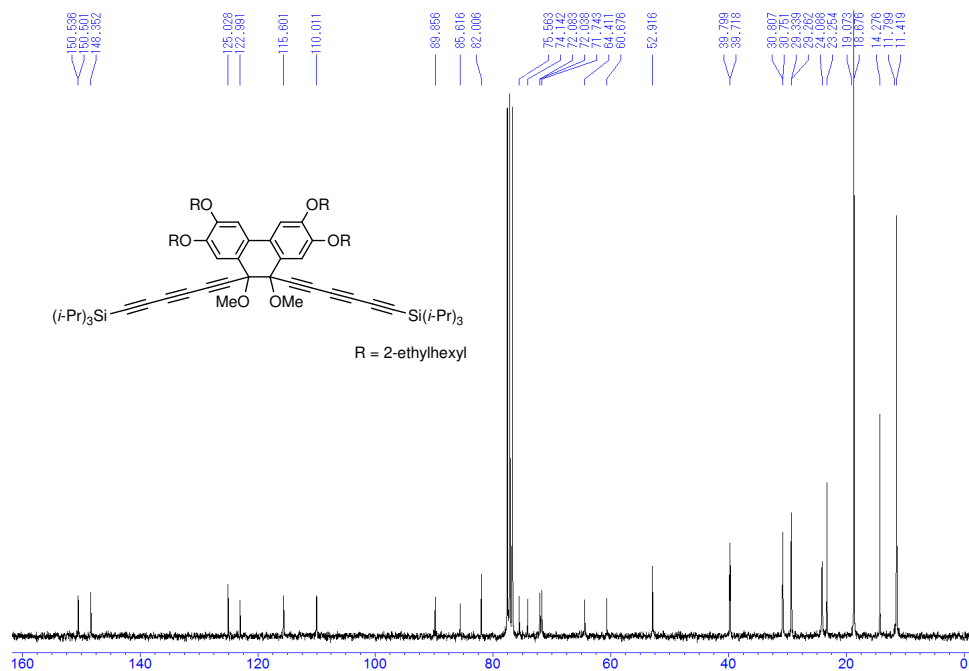

$^{13}\text{C}$  NMR spectrum of **7** in  $\text{CDCl}_3$  solution.

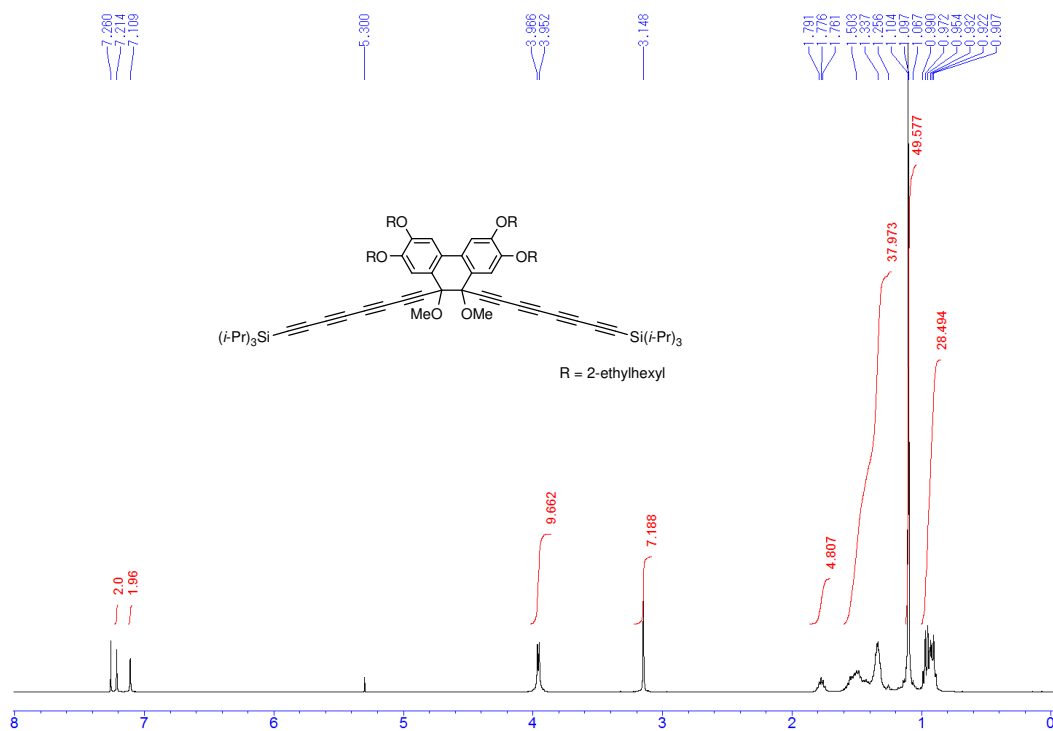

$^1\text{H}$  NMR spectrum of **9** in  $\text{CDCl}_3$  solution.

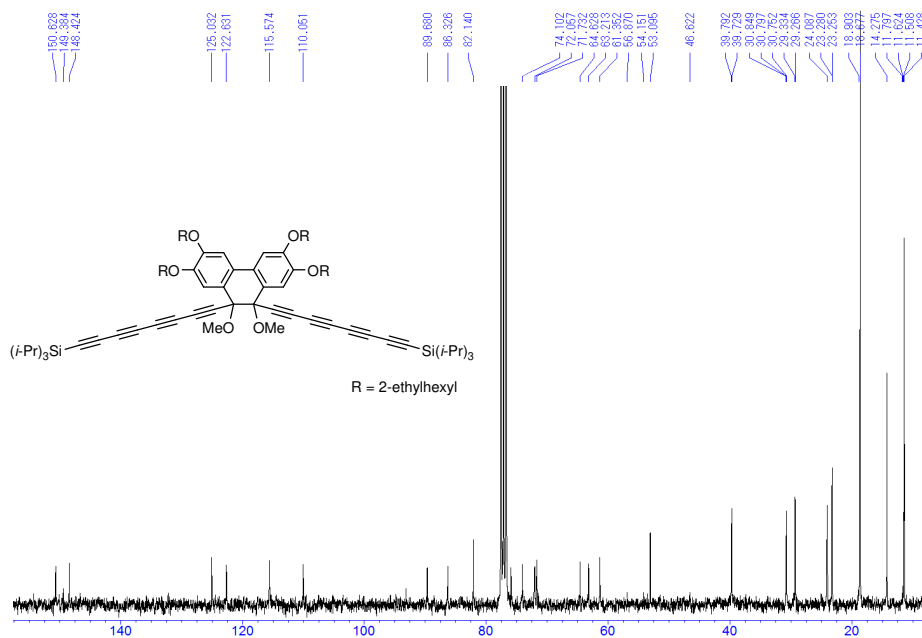

$^{13}\text{C}$  NMR spectrum of **9** in  $\text{CDCl}_3$  solution.

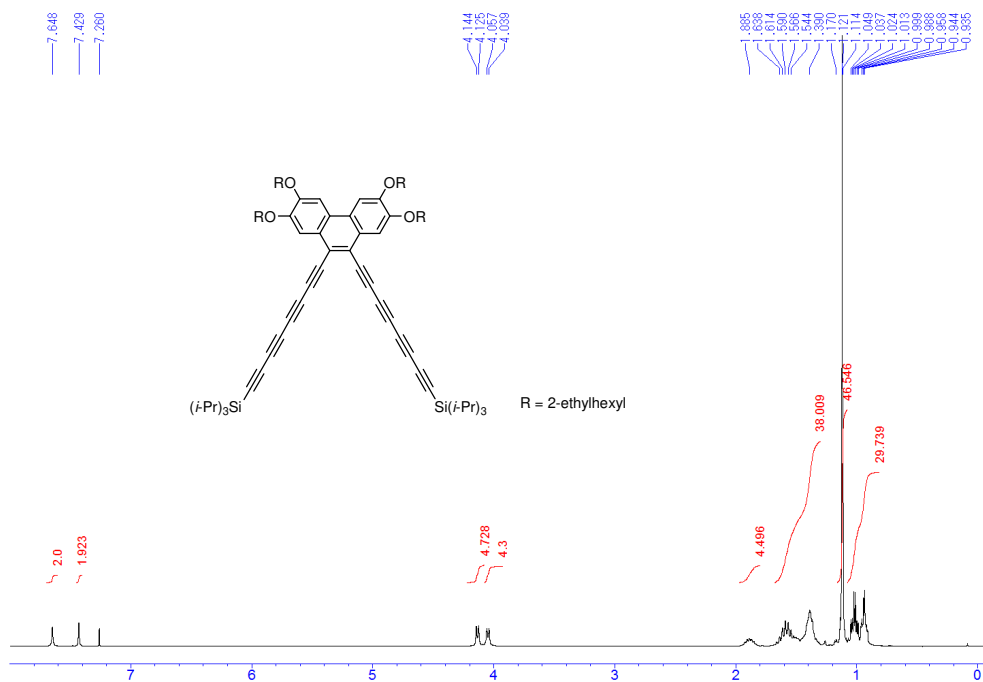

$^1\text{H}$  NMR spectrum of **10** in  $\text{CDCl}_3$  solution.

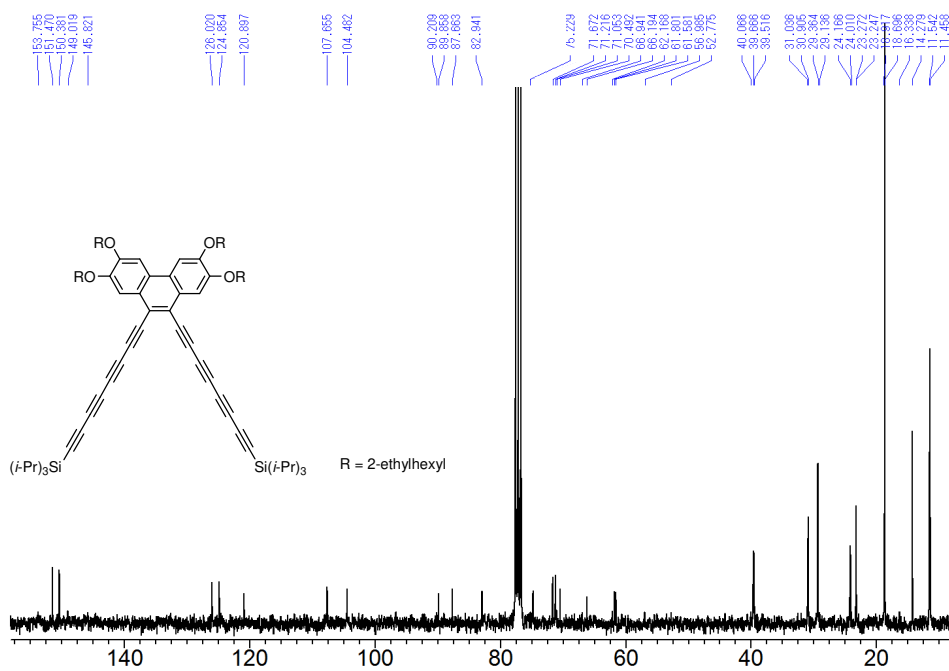

$^{13}\text{C}$  NMR spectrum of **10** in  $\text{CDCl}_3$  solution.

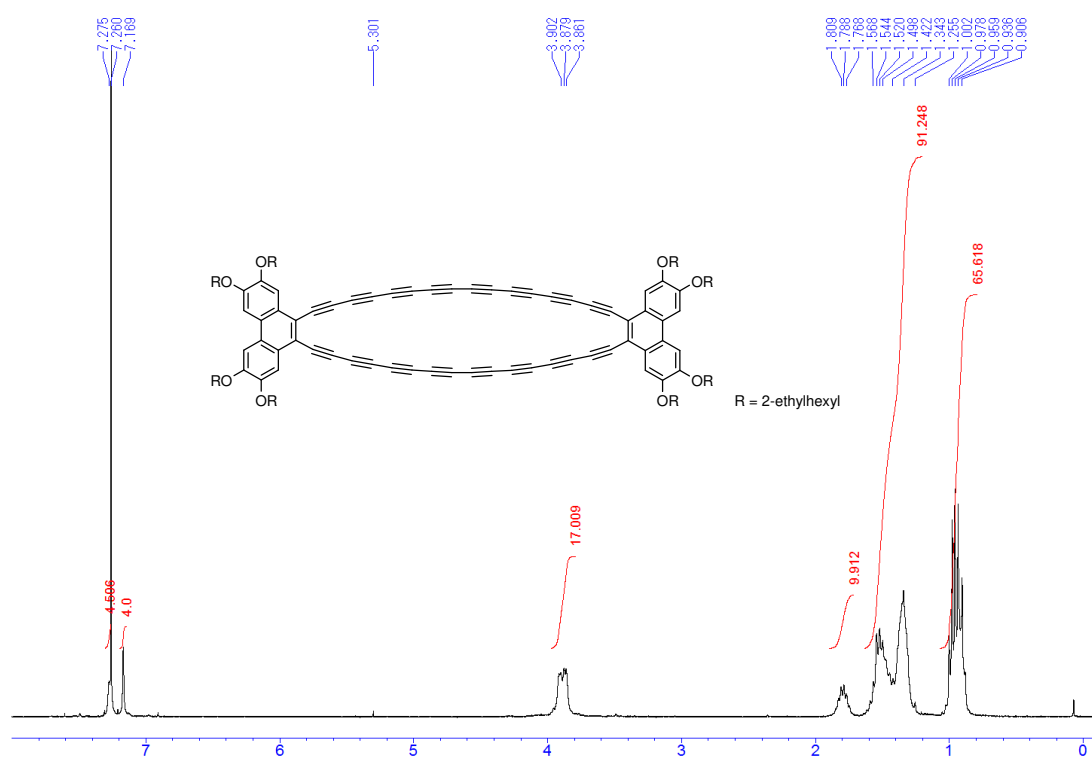

$^1\text{H}$  NMR spectrum of **4** in  $\text{CDCl}_3$  solution.

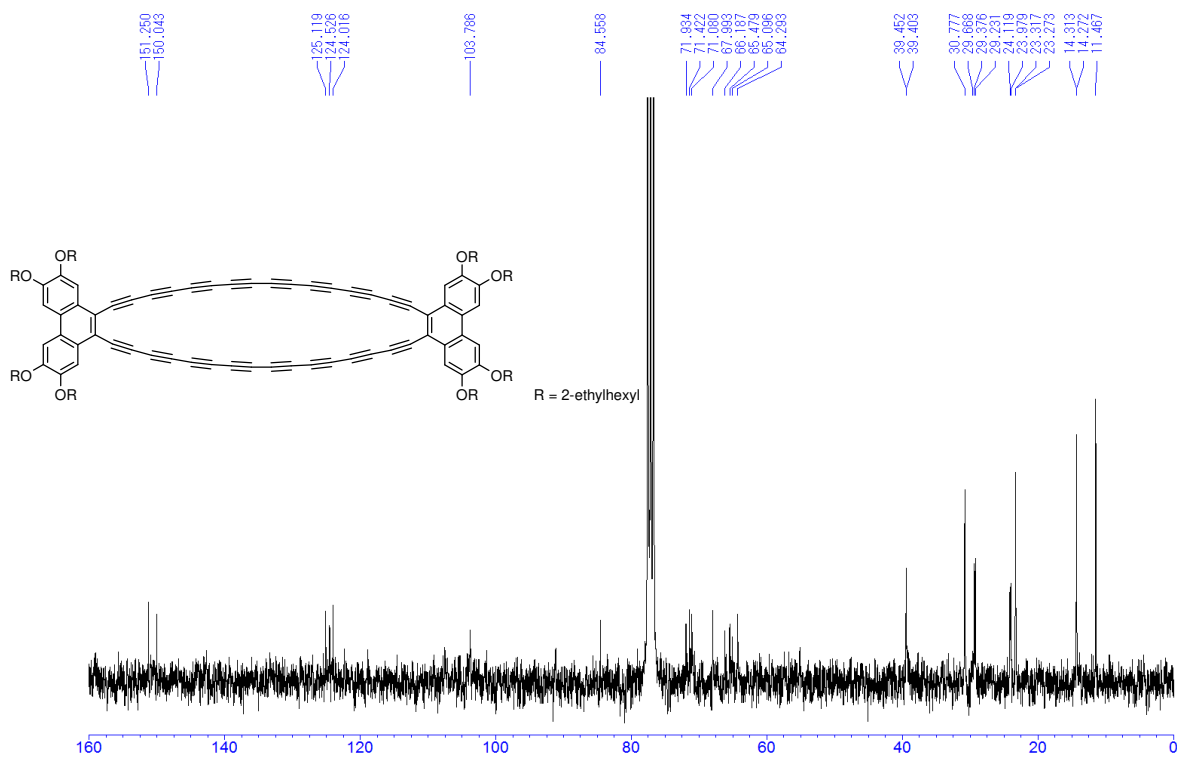

$^{13}\text{C}$  NMR spectrum of **4** in  $\text{CDCl}_3$  solution. Despite many attempts, the spectrum with a high S/N ratio was not obtained probably due to the self-association behavior.

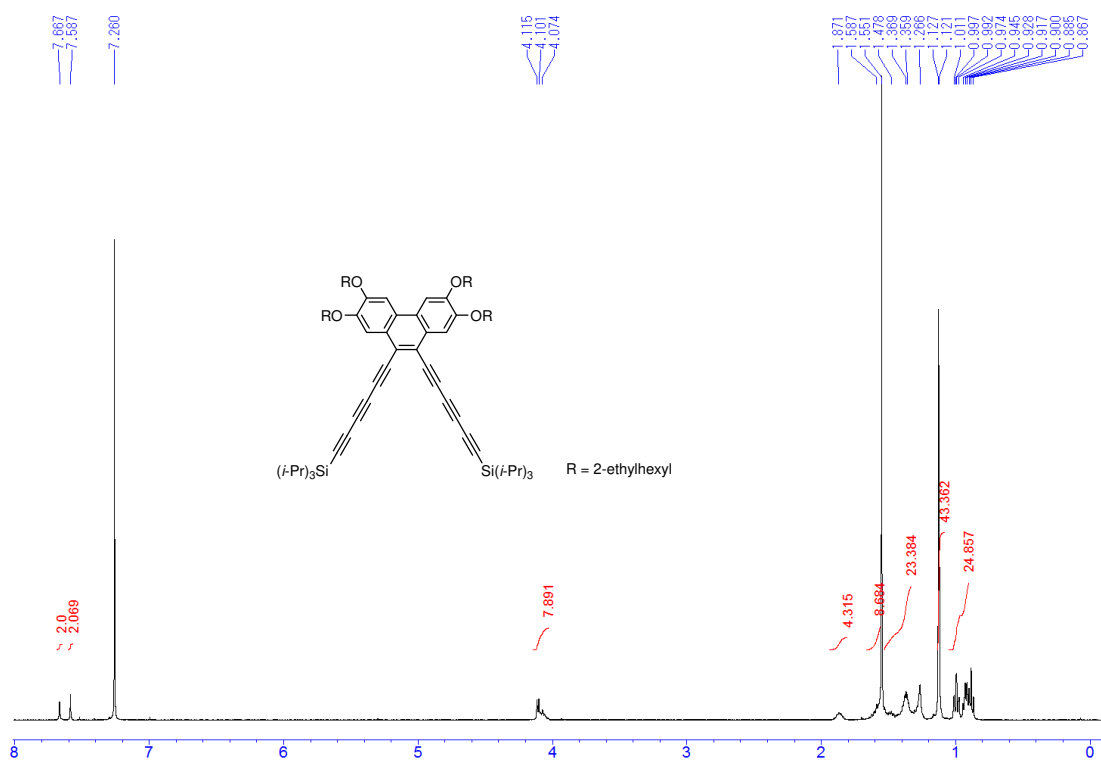

$^1\text{H}$  NMR spectrum of **12** in  $\text{CDCl}_3$  solution.

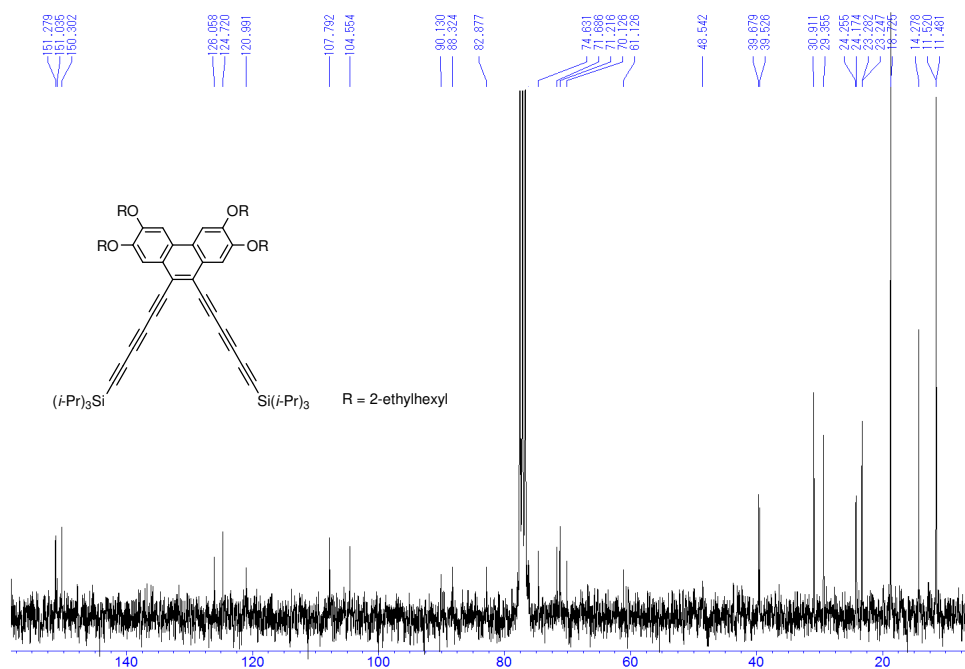

$^{13}\text{C}$  NMR spectrum of **12** in  $\text{CDCl}_3$  solution.



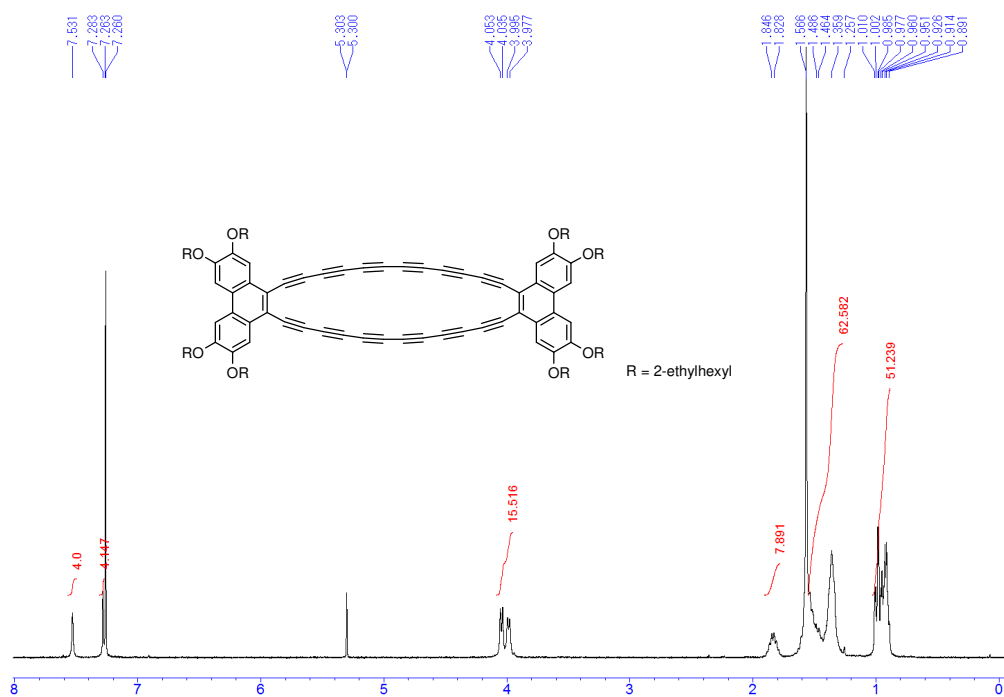

<sup>1</sup>H NMR spectrum of **3** in CDCl<sub>3</sub> solution.

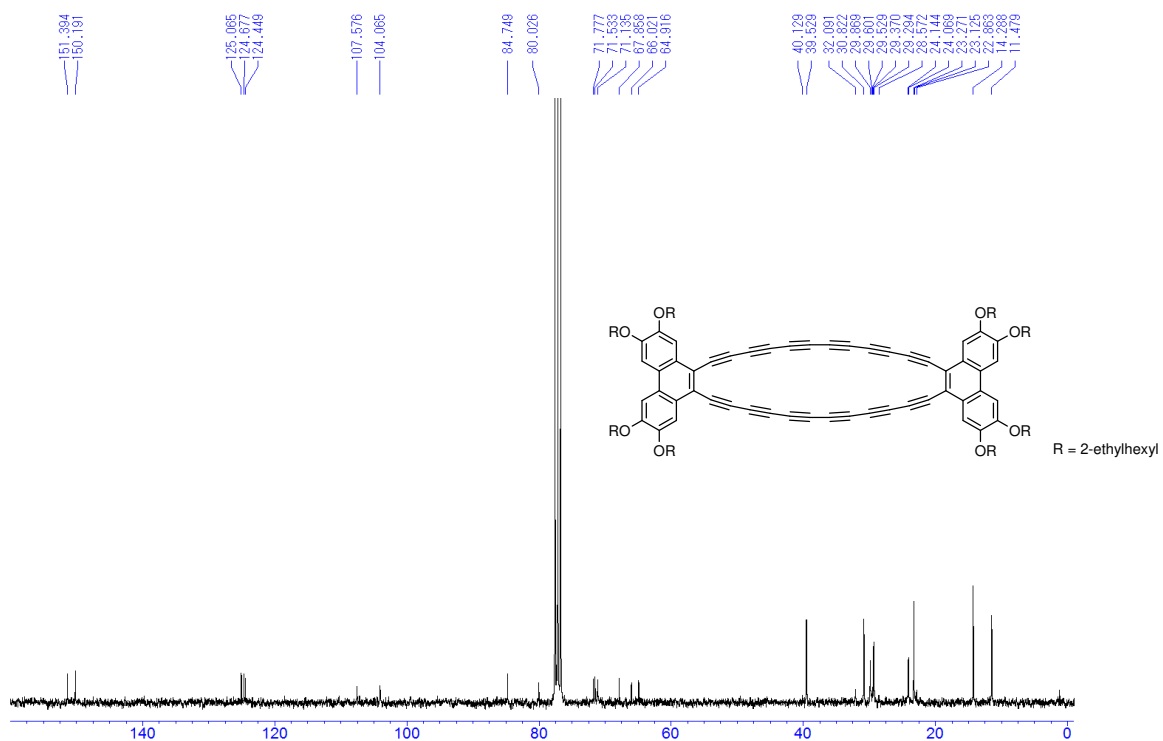

<sup>13</sup>C NMR spectrum of **3** in CDCl<sub>3</sub> solution.

## 5. References

- [1] N. Takahashi, S.-i. Kato, M. Yamaji, M. Ueno, R. Iwabuchi, Y. Shimizu, M. Nitani, Y. Ie, Y. Aso, T. Yamanobe, H. Uehara, Y. Nakamura, *J. Org. Chem.* **2017**, *82*, 8882.
- [2] R. B. Martin, *Chem. Rev.* **1996**, *96*, 3043.
- [3] Kaleidagraph 4.5, W. Jones, Synergy Software, Pennsylvania, USA.
- [4] M. M. J. Smulders, M. M. L. Nieuwenhuizen, T. F. A. de Greef, P. van der Schoot, A. P. H. J. Schenning, E. W. Meijer, *Chem. -Eur. J.* **2010**, *16*, 362.
- [5] Gaussian 16, Revision C.01, M. J. Frisch, G. W. Trucks, H. B. Schlegel, G. E. Scuseria, M. A. Robb, J. R. Cheeseman, G. Scalmani, V. Barone, G. A. Petersson, H. Nakatsuji, X. Li, M. Caricato, A. V. Marenich, J. Bloino, B. G. Janesko, R. Gomperts, B. Mennucci, H. P. Hratchian, J. V. Ortiz, A. F. Izmaylov, J. L. Sonnenberg, D. Williams-Young, F. Ding, F. Lipparini, F. Egidi, J. Goings, B. Peng, A. Petrone, T. Henderson, D. Ranasinghe, V. G. Zakrzewski, J. Gao, N. Rega, G. Zheng, W. Liang, M. Hada, M. Ehara, K. Toyota, R. Fukuda, J. Hasegawa, M. Ishida, T. Nakajima, Y. Honda, O. Kitao, H. Nakai, T. Vreven, K. Throssell, J. A. Montgomery, Jr., J. E. Peralta, F. Ogliaro, M. J. Bearpark, J. J. Heyd, E. N. Brothers, K. N. Kudin, V. N. Staroverov, T. A. Keith, R. Kobayashi, J. Normand, K. Raghavachari, A. P. Rendell, J. C. Burant, S. S. Iyengar, J. Tomasi, M. Cossi, J. M. Millam, M. Klene, C. Adamo, R. Cammi, J. W. Ochterski, R. L. Martin, K. Morokuma, O. Farkas, J. B. Foresman, and D. J. Fox, Gaussian, Inc., Wallingford CT, 2016.
- [6] K. Kitaura, K. Morokuma, *Int. J. Quantum Chem.* **1976**, *10*, 325.
- [7] D. G. Fedorov, K. Kitaura, *J. Comput. Chem.* **2007**, *28*, 222.
- [8] M. S. Gordon, D. G. Fedorov, S. R. Pruitt, L. V. Slipchenko, *Chem. Rev.* **2012**, *112*, 632.
- [9] S. Grimme, J. Antony, S. Ehrlich, H. Krieg, *J. Chem. Phys.* **2010**, *132*, 154104.
- [10] S. Grimme, S. Ehrlich, L. Goerigk, *J. Comput. Chem.* **2011**, *32*, 1456.
- [11] H. Kruse, S. Grimme, *J. Chem. Phys.* **2012**, *136*, 154101.
- [12] U. R. Fogueri, S. Kozuch, A. Karton, J. M. L. Martin, *J. Phys. Chem. A* **2013**, *117*, 2269.
- [13] S. R. Pruitt, S. S. Leang, P. Xu, D. G. Fedorov, M. S. Gordon, *Comput. Theor. Chem.* **2013**, *1021*, 70.
- [14] M. W. Schmidt, K. K. Baldridge, J. A. Boatz, S. T. Elbert, M. S. Gordon, J. H. Jensen, S. Koseki, N. Matsunaga, K. A. Nguyen, S. Su, T. L. Windus, M. Dupuis, J. A. Montgomery, Jr., *J. Comput. Chem.* **1993**, *14*, 1347.
- [15] BIOVIA Materials Studio 2020 (ver. 20.1.0.2728), Dassault Systèmes S.E., Vélizy-Villacoublay, FR.
- [16] W. A. Chalifoux, R. R. Tykwinski, *Nat. Chem.* **2010**, *2*, 967.
- [17] W. A. Chalifoux, R. McDonald, M. J. Ferguson, R. R. Tykwinski, *Angew. Chem. Int. Ed.* **2009**, *48*, 7915.
- [18] Y. Tobe, N. Utsumi, K. Kawabata, A. Nagano, K. Adachi, S. Araki, M. Sonoda, K. Hirose, K. Naemura, *J. Am. Chem. Soc.* **2002**, *124*, 5350.
- [19] S. Lahiri, J. L. Thompson, J. S. Moore, *J. Am. Chem. Soc.* **2000**, *122*, 11315.
- [20] H. Enozawa, M. Hasegawa, D. Takamatsu, K.-i. Fukui, M. Iyoda, *Org. Lett.* **2006**, *8*, 1917.
- [21] S.-i. Kato, N. Takahashi, H. Tanaka, A. Kobayashi, T. Yoshihara, S. Tobita, T. Yamanobe, H. Uehara, Y. Nakamura, *Chem. -Eur. J.* **2013**, *19*, 12138.
- [22] S.-i. Kato, N. Takahashi, Y. Nakamura, *J. Org. Chem.* **2013**, *78*, 7658.

- [23] M. M. Haley, M. L. Bell, S. C. Brand, D. B. Kimball, J. J. Pak, W. B. Wan, *Tetrahedron Lett.* **1997**, *38*, 7483.
- [24] M. A. Heuft, S. K. Collins, G. P. Yap, A. G. Fallis, *Org. Lett.* **2001**, *3*, 2883.
- [25] M. Kivala, F. Mitzel, C. Boudon, J. P. Gisselbrecht, P. Seiler, M. Gross, F. Diederich, *Chem. -Asian J.* **2006**, *1*, 479.
- [26] H. L. Anderson, C. J. Walter, A. Vidal-Ferran, R. A. Hay, P. A. Lowden, J. K. M. Sanders, *J. Chem. Soc., Perkin Trans. 1* **1995**, 2775.

## 6. Author contributions

S.-i. Kato and Y. Nakamura conceived and designed the projects; R. Kumagai synthesized the compounds and contributed on most of the experimental work; R. Kumagai, N. Takahashi, and K. Hayashi performed the investigation on self-association; S.-i. Kato, T. Abe, C. Higuchi, Y. Shiota, T. Hirose, and K. Yoshizawa performed the theoretical calculations; Md. Z. Hossain performed the Raman spectroscopic measurements; S.-i. Kato, Y. Shiota, K. Yamamoto, T. Hirose, and Y. Nakamura wrote the manuscript; S.-i. Kato played a critical role in the discussion of the experimental design, project direction, experiments and results, and preparation of the manuscript; All authors discussed the results and commented on the manuscript.
